# Supplementary material for: P+ addition and transfer involving a tetraphosphenium ion
Source: Royal Society of Chemistry journal article supplement (doi:10.1039/d4sc06823h), 2024-11-25
Supplement: d4sc06823h1.pdf [file d4sc06823h1.pdf]

Electronic Supporting Information

**P<sup>+</sup> Addition and Transfer involving a Tetraphosphenium Ion**

Roman Franz, Máté Bartek, Clemens Bruhn, Zsolt Kelemen\* and Rudolf Pietschnig\*

## Table of Contents

|                                                     |     |
|-----------------------------------------------------|-----|
| Table of Contents .....                             | S2  |
| Experimental Procedures.....                        | S3  |
| Synthetic protocols and characterization.....       | S3  |
| X-ray crystallography.....                          | S5  |
| Molecular structure of 2 in the solid state .....   | S6  |
| Computational details.....                          | S7  |
| P <sup>+</sup> transfer and related reactions ..... | S15 |
| NMR spectra of isolated new compounds.....          | S18 |
| References .....                                    | S33 |
| XYZ coordinates .....                               | S34 |

## Experimental Procedures

All reactions were carried out by means of standard Schlenk or glovebox techniques under inert gas atmosphere (argon). Solvents were dried over Na/K alloy before use and were freshly distilled under inert gas. Deuterated solvents for NMR-spectroscopy were dried and stored over molecular sieves.  $[\text{Fe}(\text{C}_5\text{H}_4\text{P}(\text{Cl}_2)_2)_2]$ ,  $[\text{Fe}(\text{C}_5\text{H}_4\text{P}(t\text{Bu})\text{H})_2]^2$  (**7**),  $[\text{Fe}(\text{C}_5\text{H}_4\text{P}t\text{Bu})_2\text{PH}]^3$  (**9**) and  $\text{TipLi}^4$  were prepared according to literature procedures while other reagents were used as received without further purification.  $^1\text{H}$ -,  $^{11}\text{B}$ -,  $^{13}\text{C}$ -,  $^{19}\text{F}$ -,  $^{27}\text{Al}$ -, and  $^{31}\text{P}$ -NMR-data was recorded on Jeol JNM-ECZL500, Varian VNMRS-500 MHz or MR-400 MHz spectrometers at 25°C. Chemical shifts were referenced to residual protic impurities in the solvent ( $^1\text{H}$ ) or the deuterated solvent ( $^{13}\text{C}$ ) and reported relative to external  $\text{SiMe}_4$  ( $^1\text{H}$ ,  $^{13}\text{C}$ ). NMR Spectra of heteronuclei were referenced using the  $\Xi$ -scale following IUPAC recommendations with  $\text{BF}_3 \cdot \text{Et}_2\text{O}$  ( $^{11}\text{B}$ ),  $\text{CFCl}_3$  ( $^{19}\text{F}$ ),  $\text{Al}(\text{NO}_3)_3$  ( $^{27}\text{Al}$ ) or  $\text{H}_3\text{PO}_4$  (85%) ( $^{31}\text{P}$ ) as secondary references.<sup>5</sup> ESI-HR or APCI-DIP-HR mass determinations were performed on a Finnigan LCQ Deca (*ThermoQuest*). Elemental analyses were performed with a HEKAtech Euro EA CHNS elemental analyzer. Samples were prepared in a Sn cup and analyzed with added  $\text{V}_2\text{O}_5$ .

Crystallographic measurements were carried out on a *Stoe* IPDS2 or a *Stoe* StadiVari diffractometer with a STOE image plate detector and a  $\text{Mo-K}\alpha$  ( $\lambda = 0.71073 \text{ \AA}$ ) monochromator or a *Stoe* StadiVari diffractometer with a Pilatus 200K image plate detector and  $\text{Cu-K}\alpha$  ( $\lambda = 1.54186 \text{ \AA}$ ) radiation. Direct methods were used to solve the measurements and refined by "least-square" cycles (SHELXL-2017).<sup>6</sup> All non-hydrogen atoms were anisotropically refined without restriction. The evaluation of the data sets, as well as the graphical preparation of the structures was carried out using Olex2<sup>7</sup> and Mercury.<sup>8</sup> Details of the structure determinations and refinement are summarized in Table S1. The CCDC depositions 2328571-2328573 contain the supplementary crystallographic data for this paper, which can be obtained free of charge via emailing data\_request@ccdc.cam.ac.uk, or by contacting The Cambridge Crystallographic Data Centre at 12 Union Road, Cambridge CB2 1EZ, UK; fax: +44 1223 336033.

## Synthetic protocols and characterization

### Synthesis of 2

To a solution of 1.939 g (5 mmol) **1** in 10 mL THF 20 mL of a freshly prepared  $\text{TipLi}$  solution (0.75 M in THF) was added dropwise at 0 °C. The mixture was warmed to room temperature and stirred overnight. A suspension of 200 mg lithium aluminum hydride in 10 mL THF was added at room temperature and the solution was stirred for another 30 min, before the excess of lithium aluminum hydride was quenched with water. The organic phase was extracted with diethyl ether. The diethyl ether extract was dried with  $\text{MgSO}_4$  and evaporated to dryness yielding raw product. The raw product was subjected to flash column separation on silica using a mixture of pentane and methylene chloride as eluent which afforded 64% yield (2.092 g, 3.2 mmol) as yellow crystals.

The following NMR chemical shifts, marked with an asterisk, indicate two distinct signals due to *rac/meso* diastereomers.

$^1\text{H}$ -NMR (400 MHz,  $\text{C}_6\text{D}_6$ ):  $\delta$  7.13 (s, 4H, aryl-H), 5.67\* and 5.64\* (d,  $^1J_{\text{PH}}=226 \text{ Hz}$ , 2H, PH), 4.39 (m, 1H, Cp), 4.33 (m, 1H, Cp), 4.28 (m, 1H, Cp), 4.22 (m, 1H, Cp), 4.15 – 4.13 (m, 1H, Cp), 4.13 – 4.09 (m, 2H, Cp), 4.13 – 4.09 (m, 4H, *o*-CH(CH<sub>3</sub>)<sub>2</sub>), 4.08 – 4.07 (m, 1H, Cp), 2.76 (sept,  $^3J_{\text{HH}}=6.9 \text{ Hz}$ , 2H, *p*-CH(CH<sub>3</sub>)<sub>2</sub>), 1.36\* and 1.36\* (d,  $^3J_{\text{HH}}=6.8 \text{ Hz}$ , 12H, CH<sub>3</sub>), 1.23 (d,  $^3J_{\text{HH}} = 6.8 \text{ Hz}$ , 12H, CH<sub>3</sub>), 1.21\* and 1.20 (d,  $^3J_{\text{HH}}=6.9 \text{ Hz}$ , 12H, CH<sub>3</sub>).  $^{13}\text{C}$ -NMR (101 MHz,  $\text{C}_6\text{D}_6$ ):  $\delta$  152.9 – 152.6 (m, aryl-C), 149.9 (d,  $^nJ_{\text{CP}}=7.1 \text{ Hz}$ , aryl-C), 130.5 – 130.1 (m, aryl-C<sub>q</sub>), 121.8 (d,  $^3J_{\text{CP}}=2.3 \text{ Hz}$ , m aryl-C), 76.8 (psd, Cp), 76.2 (psd, Cp), 75.57 (psd, Cp), 75.5 (psd, Cp), 75.1 – 74.8 (m, Cp-C<sub>q</sub>), 72.1 (s, Cp), 72.0 (s, Cp), 71.6 – 71.5 (m, Cp), 71.5 – 71.4 (m, Cp), 34.8 (s, *p*-CH(CH<sub>3</sub>)), 33.3 – 33.1 (m, *o*-CH(CH<sub>3</sub>)), 25.1 (s, *p*-CH(CH<sub>3</sub>)), 24.5\* and 24.4\* (s, *o*-CH(CH<sub>3</sub>)), 24.2\* and 24.2\* (s, *o*-CH(CH<sub>3</sub>)).  $^{31}\text{P}\{^1\text{H}\}$ -NMR (202 MHz,  $\text{C}_6\text{D}_6$ ):  $\delta$  -97.8\* and -97.9\* (s). MS (APCI-DIP-HR) [ $m/z$ ]: 655.328012 ([ $\text{M}+\text{H}$ ]<sup>+</sup> 10%), calculated for  $[\text{C}_{40}\text{H}_{57}\text{FeP}_2]^+ = 655.327943$ . Elemental analysis [%]: calculated: C 73.39; H 8.62, found: C 72.97, H 8.83.

### Synthesis of 3

A solution of 650 mg (1 mmol) bisphosphane **2** in 20 mL diethylether was cooled to 0 °C. To the stirred solution 1 mL (4.5 mmol) triethylamine and 0.1 mL (157 mg; 1.1 mmol) trichlorophosphane were added dropwise and the mixture was warmed to room temperature. The solvent was removed under reduced pressure and the remaining residue was extracted with 2x20 mL *n*-pentane. The solid was removed and discarded. The product was crystallized from a concentrated *n*-pentane solution at -20 °C, which afforded 65% yield (469 mg, 0.65 mmol) as orange crystalline material.

$^1\text{H}$ -NMR (400 MHz,  $\text{C}_6\text{D}_6$ ):  $\delta$  7.07 (s, 4H, aryl-H), 4.80 (m, 2H, Cp), 4.64 (m, 2H, Cp), 4.48 (br, 4H, *o*-CH(CH<sub>3</sub>)<sub>2</sub>), 4.45 (m, 2H, Cp), 4.43 (m, 2H, Cp), 2.87 (m, 2H, *p*-CH(CH<sub>3</sub>)<sub>2</sub>), 1.32 (d,  $^3J_{\text{HH}}=6.7 \text{ Hz}$ , 24H, *o*-CH(CH<sub>3</sub>)<sub>2</sub>), 1.25 (d,  $^3J_{\text{HH}}=6.9 \text{ Hz}$ , 12H, *p*-CH(CH<sub>3</sub>)<sub>2</sub>).  $^{13}\text{C}$ -NMR (101 MHz,  $\text{C}_6\text{D}_6$ ):  $\delta$  156.2 (s, *p*-aryl-C), 151.5 (s, *o*-aryl-C), 127.7 (m, aryl-C<sub>q</sub>), 122.8 (s, *m*-aryl-C), 80.1 (m, Cp), 73.6 (m, Cp), 73.3 (m, Cp), 72.6 (m, Cp), 70.3 (m, Cp-C<sub>q</sub>), 34.6 (s, *p*-CH(CH<sub>3</sub>)<sub>2</sub>), 33.3 (m, *o*-CH(CH<sub>3</sub>)<sub>2</sub>), 24.8 (s, *p*-CH(CH<sub>3</sub>)<sub>2</sub>), 23.9 (m, *o*-CH(CH<sub>3</sub>)<sub>2</sub>).  $^{31}\text{P}$ -NMR (202 MHz,  $\text{C}_6\text{D}_6$ ):  $\delta$  91.2 (t,  $^1J_{\text{PP}}=177 \text{ Hz}$ , PCl), -28.1 (d,  $^1J_{\text{PP}}=177 \text{ Hz}$ , PTip).

Elemental analysis [%]: calculated: C 66.81, H 7.57, found: C 66.71, H 7.81.

### Synthesis of 4[AlCl<sub>4</sub>]<sub>2</sub>

72 mg (0.1 mmol) **3** and 20 mg (0.15 mmol) aluminum(III) chloride were suspended in 1 mL 1,2-difluorobenzene and heated to 60 °C for 4 h in an Young-NMR tube. The product was formed as an orange solid which was separated and washed with 1 mL 1,2-difluorobenzene and 1 mL *n*-pentane. Evaporation of residual solvent results in analytically pure product as a yellow solid 20% yield (18 mg, 0.02 mmol). The product can be recrystallized from a concentrated 1,2-difluorobenzene or methylene chloride solution at room temperature.

<sup>1</sup>H-NMR (400 MHz, DCM-d<sub>2</sub>): δ 7.33 (m, 4H, aryl-H), 5.63 (m, 4H, Cp), 5.06 (m, 4H, Cp), 3.68 (m, 4H, *o*-CH(CH<sub>3</sub>)<sub>2</sub>), 2.98 (m, 2H, *p*-CH(CH<sub>3</sub>)<sub>2</sub>), 1.62 (br, 12H, *o*-CH(CH<sub>3</sub>)<sub>2</sub>), 1.46 (br, 12H, *o*-CH(CH<sub>3</sub>)<sub>2</sub>), 1.24 (psd, *J*=6.9 Hz, 12H, *p*-CH(CH<sub>3</sub>)<sub>2</sub>). <sup>13</sup>C-NMR (101 MHz, DCM-d<sub>2</sub>): δ 161.1 (m, *p*-C<sub>Ph</sub>), 153.9 (pst, *J*<sub>CP</sub>=7 Hz, *o*-C<sub>Ph</sub>), 126.3 (pst, *J*=6 Hz, *m*-C<sub>Ph</sub>), 125.1 (m, aryl-C<sub>q</sub>), 80.0 (m, Cp), 78.9 (m, Cp), 63.5 (m, Cp-C<sub>q</sub>), 39.1 (s, *o*-CH(CH<sub>3</sub>)<sub>2</sub>), 35.2 (m, *p*-CH(CH<sub>3</sub>)<sub>2</sub>), 25.5 (br, *o*-CH(CH<sub>3</sub>)<sub>2</sub>), 25.0 (br, *o*-CH(CH<sub>3</sub>)<sub>2</sub>), 23.3 (s, *p*-CH(CH<sub>3</sub>)<sub>2</sub>). <sup>27</sup>Al-NMR (130 MHz, DCM-d<sub>2</sub>): δ 104.1 (FWHM=275 Hz). <sup>31</sup>P-NMR (202 MHz, DCM-d<sub>2</sub>): δ -22.9 (t, <sup>1</sup>*J*<sub>PP</sub>=306 Hz, *P*Tip), -213.1 (t, <sup>1</sup>*J*<sub>PP</sub>=306 Hz, *P*P<sub>3</sub>). Elemental analysis [%]: calculated: C 45.66, H 5.17, found: C 45.88, H 5.29.

### Synthesis of 5[Al<sub>2</sub>Cl<sub>7</sub>]

10 mg (0.01 mmol) 4[AlCl<sub>4</sub>]<sub>2</sub> were dissolved in 0.6 mL methylene chloride or chloroform. Quantitative formation of the product was observed within 48 h. Evaporation of the solvent leads to pure product as a yellow amorphous solid.

<sup>1</sup>H-NMR (400 MHz, DCM-d<sub>2</sub>): δ 7.23 (m, 4H, aryl-H), 5.54 (m, 2H, Cp), 4.90 (m, 2H, Cp), 4.84 (m, 2H, Cp), 4.63 (m, 2H, Cp), 3.57 (m, 4H, *o*-CH(CH<sub>3</sub>)<sub>2</sub>), 2.96 (m, 2H, *p*-CH(CH<sub>3</sub>)<sub>2</sub>), 1.46 (psd, *J*=6.5 Hz, 12H, *o*-CH(CH<sub>3</sub>)<sub>2</sub>), 1.41 (psd, *J*=6.5 Hz, 12H, *o*-CH(CH<sub>3</sub>)<sub>2</sub>), 1.26 (psd, *J*=6.9 Hz, 12H, *p*-CH(CH<sub>3</sub>)<sub>2</sub>). <sup>27</sup>Al-NMR (130 MHz, DCM-d<sub>2</sub>): δ 103.9 (FWHM=150 Hz). <sup>31</sup>P-NMR (202 MHz, DCM-d<sub>2</sub>): δ 19.5 (dd, <sup>1</sup>*J*<sub>PP</sub>=372 Hz, <sup>1</sup>*J*<sub>PP</sub>=337 Hz, *P*Tip), -39.8 (td, <sup>1</sup>*J*<sub>PP</sub>=337 Hz, <sup>2</sup>*J*<sub>PP</sub>=108 Hz, *P*(*P*Cl)P), -130.7 (td, <sup>1</sup>*J*<sub>PP</sub>=372 Hz, <sup>2</sup>*J*<sub>PP</sub>=108 Hz, *P*P<sub>2</sub>). Elemental analysis [%]: calculated: C 45.66, H 5.17, found: C 45.62, H 5.18.

### Synthesis of 6[AlCl<sub>4</sub>]

To a suspension of 7 mg (0.05 mmol) aluminum(III) chloride 0.5 mL methylene chloride a mixture of 36 mg (0.05 mmol) **3** and 14 mg (0.05 mmol) triphenylphosphine in 0.5 mL methylene chloride was added at room temperature. Evaporation of the solvent results in analytically pure product as an amorphous orange solid in quantitative yield (57 mg, 0.05 mmol).

<sup>1</sup>H-NMR (400 MHz, DCM-d<sub>2</sub>): δ 7.68 – 7.55 (m, 4H, aryl-H), 7.44 – 7.22 (m, 15H, -PPh<sub>3</sub>), 4.69 (m, 2H, Cp), 4.49 (m, 4H, Cp), 4.45 (m, 2H, Cp), 4.06 – 3.95 (m, 2H, *o*-CH(CH<sub>3</sub>)<sub>2</sub>), 3.33 (dt, <sup>3</sup>*J*<sub>HH</sub>=12.4 Hz, 2H, *o*-CH(CH<sub>3</sub>)<sub>2</sub>), 2.94 (m, 2H, *p*-CH(CH<sub>3</sub>)<sub>2</sub>), 1.34 – 1.28 (m, 24H, *o*-CH(CH<sub>3</sub>)<sub>2</sub>), 0.87 (d, <sup>3</sup>*J*<sub>HH</sub>=6.9 Hz, 6H, *p*-CH(CH<sub>3</sub>)<sub>2</sub>), 0.75 (d, <sup>3</sup>*J*<sub>HH</sub>=6.7 Hz, 6H, *p*-CH(CH<sub>3</sub>)<sub>2</sub>). <sup>13</sup>C-NMR (101 MHz, DCM-d<sub>2</sub>): δ 155.9 (m, *o*-C<sub>Ph</sub>), 155.2 (m, *o*-C<sub>Ph</sub>), 153.3 (s, *p*-C<sub>Ph</sub>), 134.9 (m (br), C<sub>Ph</sub>), 134.4 (m (br), C<sub>Ph</sub>), 134.1 (m, C<sub>Ph</sub>), 130.1 (m, C<sub>Ph</sub>), 130.0 (m, C<sub>Ph</sub>), 129.1 (m (br), C<sub>Ph</sub>), 129.0 (m (br), C<sub>Ph</sub>), 125.6 (m, C<sub>Ph</sub>), 124.6 (s, C<sub>Ph</sub>), 122.8 (pst, C<sub>Ph</sub>), 79.2 (m, Cp), 77.4 (pst, Cp), 74.0 (pst, Cp), 73.3 (pst, Cp), 69.8 (m, Cp-C<sub>q</sub>), 34.7 (s, *p*-CH(CH<sub>3</sub>)<sub>2</sub>), 34.4 (m, *o*-CH(CH<sub>3</sub>)<sub>2</sub>), 32.7 (m, *o*-CH(CH<sub>3</sub>)<sub>2</sub>), 27.1 (s, *p*-CH(CH<sub>3</sub>)<sub>2</sub>), 26.5 (s, *p*-CH(CH<sub>3</sub>)<sub>2</sub>), 25.6 (psd, *o*-CH(CH<sub>3</sub>)<sub>2</sub>), 24.0 (s, *o*-CH(CH<sub>3</sub>)<sub>2</sub>), 23.9 (s, *o*-CH(CH<sub>3</sub>)<sub>2</sub>), 22.4 (s, *o*-CH(CH<sub>3</sub>)<sub>2</sub>). <sup>27</sup>Al-NMR (130 MHz, DCM-d<sub>2</sub>): δ 103.8 (FWHM=51 Hz). <sup>31</sup>P-NMR (202 MHz, THF-d<sub>8</sub>): δ 22.3 (dt, <sup>1</sup>*J*<sub>PP</sub>=379 Hz, <sup>2</sup>*J*<sub>PP</sub>=72 Hz, *P*PPh<sub>3</sub>), -5.2 (dt, <sup>1</sup>*J*<sub>PP</sub>=379 Hz, <sup>2</sup>*J*<sub>PP</sub>=174 Hz, *P*-PPh<sub>3</sub>), -43.2 (dd, <sup>1</sup>*J*<sub>PP</sub>=174 Hz, <sup>2</sup>*J*<sub>PP</sub>=72 Hz, *P*Tip). Elemental analysis [%]: calculated: C 62.55, H 6.15, found: C 62.80, H 6.29.

### Synthesis of 8c[BF<sub>4</sub>]

To a solution of 196 mg (0.5 mmol) secondary triphosphane **9** in 20 mL diethylether 1.25 mL (0.5 mmol) of a freshly prepared HBF<sub>4</sub>·Et<sub>2</sub>O solution (0.4 M in Et<sub>2</sub>O) was added at room temperature. The product was formed as a yellow solid within 10 min. The solvent was removed under reduced pressure. The remaining residue was washed with 2x20 mL *n*-pentane and extracted with 2x10 mL dichloromethane. The solid was removed and discarded. The product was crystallized from a concentrated toluene solution at -20 °C, which afforded 65% yield (156 mg, 0.33 mmol).

<sup>1</sup>H-NMR (400 MHz, DCM-d<sub>2</sub>): δ 7.07 (m, <sup>1</sup>*J*<sub>PH</sub>=467.5 Hz, 2H, PH), 5.18 (m, 2H, Cp), 4.79 (m, 4H, Cp), 4.57 (m, 2H, Cp), 1.33 (d, <sup>3</sup>*J*<sub>PH</sub>=18.8 Hz, 18H, *t*Bu CH<sub>3</sub>). <sup>13</sup>C-NMR (101 MHz, DCM-d<sub>2</sub>): δ 77.9 (m, Cp), 76.2 (m, Cp), 73.6 (m, Cp), 72.2 (m, Cp), 69.7 (m, Cp C<sub>ipso</sub>), 34.1 – 32.7 (m, *t*Bu C<sub>q</sub>), 27.1 (m, *t*Bu CH<sub>3</sub>). <sup>11</sup>B-NMR (160 MHz, DCM-d<sub>2</sub>): δ 0.5 (br). <sup>19</sup>F-NMR (470 MHz, DCM-d<sub>2</sub>): δ 149.4 (q, <sup>1</sup>*J*<sub>BF</sub>=2 Hz). <sup>31</sup>P-NMR (202 MHz, DCM-d<sub>2</sub>): δ 45.2 (dd, <sup>1</sup>*J*<sub>PP</sub>=456 Hz, <sup>1</sup>*J*<sub>PH</sub>=468 Hz, *P*H*t*Bu), -195.2 (t, <sup>1</sup>*J*<sub>PP</sub>=456 Hz, *P*P<sub>2</sub>). MS (ESI-HR) [*m/z*]: 393.074792 ([M-BF<sub>4</sub>]<sup>+</sup> 100%), calculated for [C<sub>18</sub>H<sub>28</sub>FeP<sub>3</sub>]<sup>+</sup> = 393.074779. Elemental analysis [%]: calculated: C 45.04, H 5.88; found: C 45.19, H 5.92.

## X-ray crystallography

**Table S1:** Summary of structure determinations and refinements for **2**, **4**[AlCl<sub>4</sub>]<sub>2</sub> and **8c**[BF<sub>4</sub>].

|                                                                                           | <b>2</b>                                                        | <b>4</b> [AlCl <sub>4</sub> ] <sub>2</sub>                                                                              | <b>8c</b> [BF <sub>4</sub> ]                                      |
|-------------------------------------------------------------------------------------------|-----------------------------------------------------------------|-------------------------------------------------------------------------------------------------------------------------|-------------------------------------------------------------------|
| CCDC code                                                                                 | 2328571                                                         | 2328572                                                                                                                 | 2328573                                                           |
| Empirical formula                                                                         | C <sub>40</sub> H <sub>56</sub> FeP <sub>2</sub>                | C <sub>40</sub> H <sub>54</sub> Al <sub>2</sub> Cl <sub>8</sub> FeP <sub>4</sub><br>2(CH <sub>2</sub> Cl <sub>2</sub> ) | C <sub>18</sub> H <sub>28</sub> BF <sub>4</sub> FeP <sub>3</sub>  |
| Formula weight [g/mol]                                                                    | 654.63                                                          | 1221.97                                                                                                                 | 479.97                                                            |
| Crystal system                                                                            | monoclinic                                                      | triclinic                                                                                                               | monoclinic                                                        |
| Space group                                                                               | <i>P</i> 2 <sub>1</sub> / <i>n</i>                              | <i>P</i> $\bar{1}$                                                                                                      | <i>P</i> 2 <sub>1</sub> / <i>n</i>                                |
| Unit cell dimensions:                                                                     |                                                                 |                                                                                                                         |                                                                   |
| <i>a</i> [Å]                                                                              | 6.0446(3)                                                       | 9.2572(9)                                                                                                               | 10.9377(5)                                                        |
| <i>b</i> [Å]                                                                              | 34.1672(12)                                                     | 16.6386(16)                                                                                                             | 15.3369(5)                                                        |
| <i>c</i> [Å]                                                                              | 17.5241(8)                                                      | 18.6790(18)                                                                                                             | 13.4763(6)                                                        |
| $\alpha$ [°]                                                                              | 90                                                              | 96.852(8)                                                                                                               | 90                                                                |
| $\beta$ [°]                                                                               | 96.228(4)                                                       | 99.363(8)                                                                                                               | 107.121(3)                                                        |
| $\gamma$ [°]                                                                              | 90                                                              | 94.470(8)                                                                                                               | 90                                                                |
| Volume [Å <sup>3</sup> ]                                                                  | 3597.8(3)                                                       | 2804.5(5)                                                                                                               | 2160.47(16)                                                       |
| <i>Z</i>                                                                                  | 4                                                               | 2                                                                                                                       | 4                                                                 |
| Calculated density [g/cm <sup>3</sup> ]                                                   | 1.209                                                           | 1.447                                                                                                                   | 1.476                                                             |
| Absorption coefficient $\mu$ [mm <sup>-1</sup> ]                                          | 0.534                                                           | 9.032                                                                                                                   | 0.955                                                             |
| F(000)                                                                                    | 1408                                                            | 1252                                                                                                                    | 992                                                               |
| Crystal size [mm]                                                                         | 0.20 × 0.09 × 0.02                                              | 0.35 × 0.13 × 0.02                                                                                                      | 0.34 × 0.16 × 0.02                                                |
| Radiation and $\lambda$ [Å]                                                               | Mo K $\alpha$ ( $\lambda$ = 0.71073)                            | Cu K $\alpha$ ( $\lambda$ = 1.54186)                                                                                    | Mo K $\alpha$ ( $\lambda$ = 0.71073)                              |
| $\theta$ -Range for data collection [°]                                                   | 2.38 – 51.38                                                    | 5.38 – 143.09                                                                                                           | 4.13 – 53.54                                                      |
| Index ranges                                                                              | -7 ≤ <i>h</i> ≤ 6<br>-41 ≤ <i>k</i> ≤ 36<br>-21 ≤ <i>l</i> ≤ 21 | -11 ≤ <i>h</i> ≤ 5<br>-20 ≤ <i>k</i> ≤ 19<br>-22 ≤ <i>l</i> ≤ 22                                                        | -13 ≤ <i>h</i> ≤ 13<br>-19 ≤ <i>k</i> ≤ 17<br>-16 ≤ <i>l</i> ≤ 17 |
| Refl. collected/unique                                                                    | 15032/6776                                                      | 22080/10357                                                                                                             | 14617/4576                                                        |
| Data/restraints/parameters                                                                | 6776/0/413                                                      | 10357/0/562                                                                                                             | 4576/0/258                                                        |
| Goodness-of-fit on <i>F</i> <sup>2</sup>                                                  | 1.034                                                           | 1.044                                                                                                                   | 1.048                                                             |
| Final <i>R</i> indices [ <i>I</i> > 2 $\sigma$ ( <i>I</i> )] / [ <i>wR</i> <sub>2</sub> ] | 0.0731/0.1798                                                   | 0.1377/0.3584                                                                                                           | 0.0283/ 0.0689                                                    |
| <i>R</i> indices (all data) / [ <i>wR</i> <sub>2</sub> ]                                  | 0.1228/0.2146                                                   | 0.1953/0.4064                                                                                                           | 0.0350/ 0.0724                                                    |
| Largest difference peak/hole [e Å <sup>-3</sup> ]                                         | 0.63/-0.84                                                      | 2.26/-1.58                                                                                                              | 0.36/-0.27                                                        |

## Molecular structure of **2** in the solid state

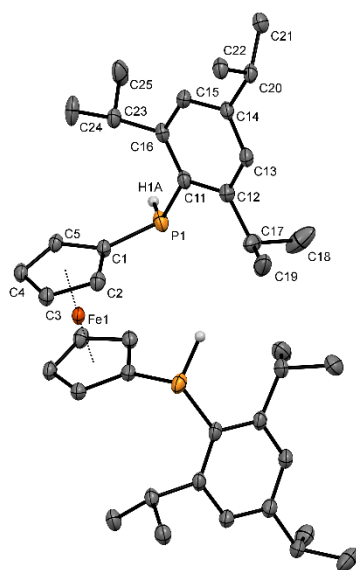

**Figure S1:** Molecular structures of **2** in the solid state. Ellipsoids are shown at 30% probability and all except the phosphorus-bonded hydrogen atoms are omitted. A disorder of the phosphorus-bonded hydrogen atoms over two positions is also not shown for clarity. Selected bond lengths in **2**: 1.21(13) Å (P1-H1A), 1.39(12) Å (P2-H2A).

## Computational details

All DFT calculations were carried out with the Gaussian 16 suite of programs.<sup>9</sup> In our previous studies, we showed that the functional  $\omega$ B97X-D describes properly similar systems.<sup>10, 11</sup> Therefore, geometry optimizations were performed at the  $\omega$ B97X-D/def2-TZVP level of theory, with the sole exception of the mechanistic studies (formation of  $4^{2+}$  and „P<sup>+</sup>“ transfer reaction discussed in Scheme 3), where a smaller basis set (def2-SVP) was applied for the optimization. Harmonic vibrational analysis was obtained at the same level, and in the case of a minima, all eigenvalues of the Hessian matrix were positive. In order to consider the effect of solvents (in case of mechanistic study and FIA calculations), the PCM model was applied. Since 1,2-difluorobenzene was not defined in the G16 program package, the less polar THF solvent was used for these calculations. The energies of molecular ground states were then recomputed applying  $\omega$ B97X-D/def2-TZVP and PCM solvent model. Gibbs free energies (at 298 K) were calculated using these electronic energies with T $\Delta$ S contribution derived from frequency calculations at the  $\omega$ B97X-D/def2-TZVP (or  $\omega$ B97X-D/def2-SVP in case of systems described in Scheme 3 and Scheme S1) level of theory. For the determination of bond critical points, Mayer indices, analysis of the Fukui function and for orbital contribution analysis the Multiwfn program was used.<sup>12</sup> Atomic basin analysis was performed using a medium sized grid (with a grid spacing of 0.1 Bohr) in Multiwfn. The basin overlap matrix was computed using a mixed grid. For visualization of the molecular orbitals IQmol program was used.<sup>13</sup> For NBO calculations NBO 7.0 was used.<sup>14</sup>

**Table S2:** Derived bond descriptors from the values of representative real space functions at the corresponding bond critical points in  $4^{2+}$  and  $5^+$  [au].

Bader suggested to divide interactions in a dichotomous manner based on the sign of the Laplacian in the bond critical point ( $\nabla_b$ ).<sup>15</sup> The symmetry of the valance shell charge concentration (VSCC) can be examined by plotting  $\nabla(r)$  along the corresponding bond path. A large, negative Laplacian with symmetric VSCC is characteristic of covalent interactions. Further distinctions can be made<sup>16</sup> from the kinetic energy density ( $G_b$ ) and the potential energy density ( $V_b$ ) at the BCP, which are connected to the value of the Laplacian by the Virial theorems. The sum of  $V_b$  and  $G_b$  gives the total energy density  $H_b$ . The adimensional ratios  $G_b/\rho_b < 1$ ,  $H_b/\rho_b < 0$ ,  $|V_b|/G_b > 2$  have been attributed to shared shell, covalent interactions.

|                  | $4^{2+}$ |       |       | $5^+$ |       |       |
|------------------|----------|-------|-------|-------|-------|-------|
|                  | P1-P2    | P2-P3 | P1-P3 | P1-P2 | P2-P3 | P1-P3 |
| $sgn \nabla_b^2$ | -        | -     | -     | -     |       | -     |
| $G_b/\rho_b$     | 0.25     | 0.35  | 0.25  | 0.20  |       | 0.20  |
| $ V_b /G_b$      | 3.32     | 2.24  | 3.32  | 3.82  |       | 3.82  |
| $H_b/\rho_b$     | -0.57    | -0.43 | -0.57 | -0.55 |       | -0.55 |

**Table S3:** Mayer bond indices and values of representative real space functions at the corresponding bond critical points in  $4^{2+}$  and  $5^+$  [au].

|                         | $4^{2+}$ |         |         | $5^+$   |       |         |
|-------------------------|----------|---------|---------|---------|-------|---------|
|                         | P1-P2    | P2-P3   | P1-P3   | P1-P2   | P2-P3 | P1-P3   |
| Mayer bond index        | 1.00     | 0.92    | 1.00    | 0.97    | 0.26  | 0.97    |
| Electron density in BCP | 0.122    | 0.093   | 0.122   | 0.123   | -     | 0.123   |
| $\nabla^2 \rho_b$       | -0.158   | -0.0314 | -0.158  | -0.174  | -     | -0.174  |
| $G_b$                   | 0.03     | 0.0323  | 0.0300  | 0.0240  | -     | 0.0240  |
| $V_b$                   | -0.0996  | -0.0725 | -0.0996 | -0.0916 | -     | -0.0916 |
| $H_b$                   | -0.0695  | -0.004  | -0.0695 | -0.0676 | -     | -0.0676 |

**Table S4:** Delocalization indices (derived from QTAIM analysis) for  $4^{2+}$  and  $5^+$ 

|    | $4^{2+}$ |      |      |      | $5^+$ |      |      |      |
|----|----------|------|------|------|-------|------|------|------|
|    | P1       | P2   | P3   | P4   | P1    | P2   | P3   | P4   |
| P1 | 4.24     | 0.96 | 0.96 | 0.10 | 4.27  | 0.91 | 1.05 | 0.17 |
| P2 | 0.96     | 3.45 | 0.93 | 0.96 | 0.91  | 3.51 | 0.28 | 0.91 |
| P3 | 0.96     | 0.93 | 3.45 | 0.96 | 1.05  | 0.28 | 3.17 | 1.05 |
| P4 | 0.10     | 0.96 | 0.96 | 4.24 | 0.17  | 0.91 | 1.05 | 4.28 |

**Table S5:** Partial natural charges, and QTAIM charges of the phosphorus atoms in  $4^{2+}$ .

|                 | $4^{2+}$ |      |      |      |
|-----------------|----------|------|------|------|
|                 | P1       | P2   | P3   | P4   |
| Natural charges | 1.00     | 0.21 | 0.21 | 1.00 |
| QTAIM charges   | 1.41     | 0.24 | 0.24 | 1.41 |

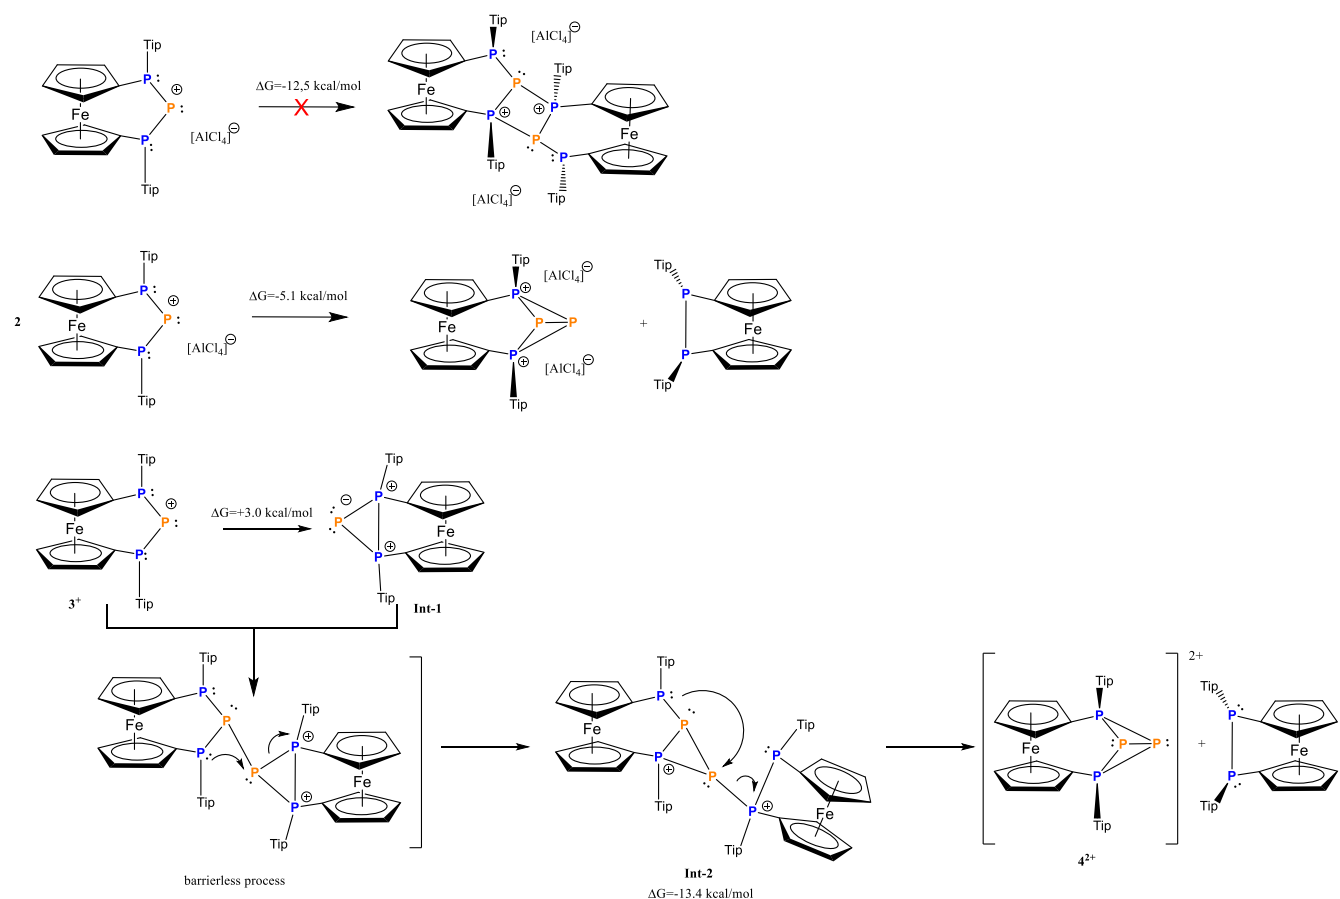

**Scheme S1** Proposed mechanism of the formation of  $4^{2+}$ . During our DFT investigations, we successfully optimized the structure of **Int-1**. The relative stability of **Int-1** is similar to that of the starting  $3^+$  ( $\Delta G = +3$  kcal/mol) and the central phosphorus in **Int-1** is inversely polarized compared to  $3^+$ , which may allow P-P bond formation between the two compounds without significant barrier. During the geometry optimization of the proposed P-P bonded complex of  $3^+$  and **Int-1**, we obtained **Int-2**, which is more stable by 13.4 kcal/mol than the van der Waals complex of  $3^+$  and **Int-1**. The next step involves the elimination of diphosphane. It is important to note that a direct comparison of the different processes in terms of Gibbs free energy is limited due to the different overall charges of the investigated systems (cationic systems with or without counter ions). (Geometry optimizations were performed at  $\omega$ B97X-D/def2-SVP. The energies of molecular ground states were then recomputed applying  $\omega$ B97X-D/def2-TZVP and PCM solvent model. Gibbs free energies (at 298 K) were calculated using these electronic energies with  $T\Delta S$  contribution derived from frequency calculations at the  $\omega$ B97X-D/def2-SVP level of theory.)



**Table S6:** Comparison of the FIA values (in kcal/mol) of  $4^{2+}$  with different dicationic systems reported by Dielmann<sup>15</sup> (recomputed with Me substituents at the imidazolium units), Weigand&Burford<sup>17</sup> and Alder.<sup>18</sup>

| Compound                                                                          | FIA <sub>gas</sub> | FIA <sub>PCM=THF</sub> |
|-----------------------------------------------------------------------------------|--------------------|------------------------|
| $4^{2+}$                                                                          | 239.0              | 87.2                   |
| 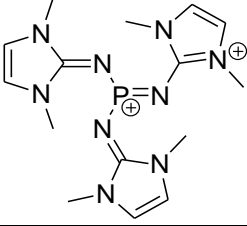 | 246.0              | 87.9                   |
|  | 245.2              | 68.5                   |
|  | 243.2              | 64.1                   |

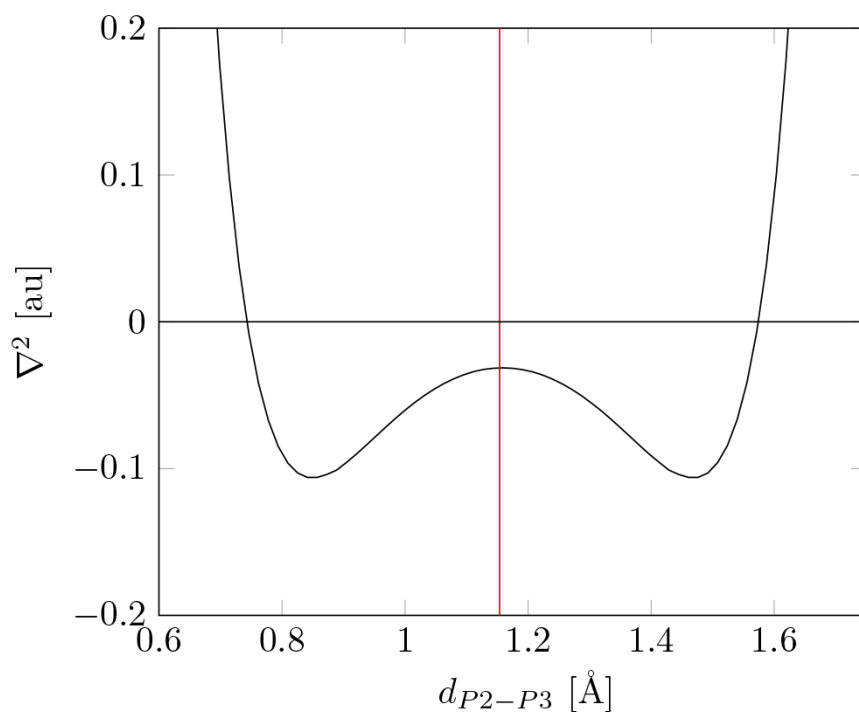

**Figure S2:** Value of the Laplacian along the P2-P3 bond path in  $4^{2+}$ . The position of the BCP is indicated as a red line.

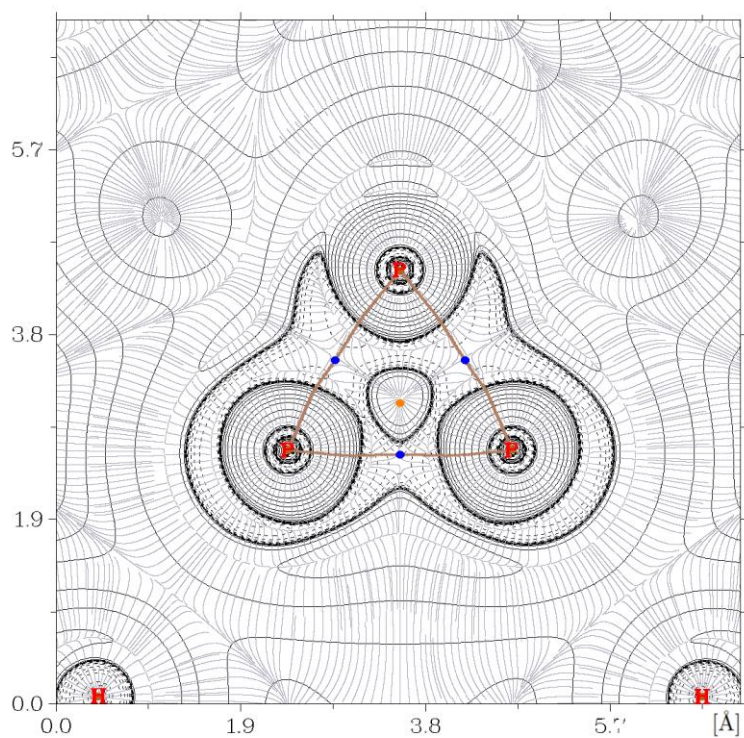

**Figure S3:** The Laplacian gradient (grey) and contour (dotted) plot for  $4^{2+}$  in the P1-P2-P3 plane. Bond critical points are indicated as blue, and ring critical points with orange dots.

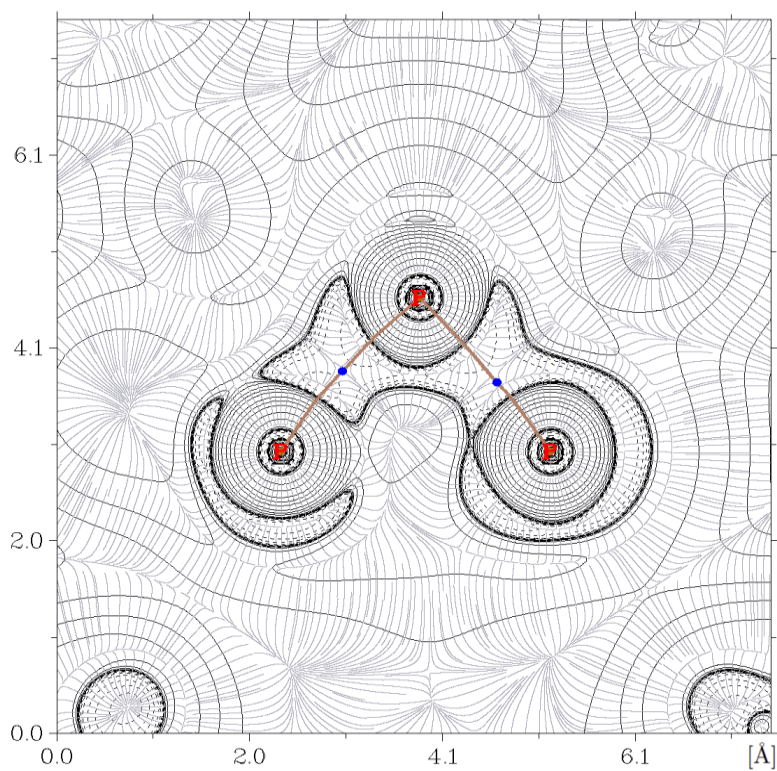

**Figure S4:** The Laplacian gradient (grey) and contour (dotted) plot for  $5^{+}$  in the P1-P2-P3 plane. Bond critical points are indicated as blue dots

**Table S7:** Orbital contribution of each phosphorus atom to the HOMO, and natural charges of **8a**, **8b** and **8c**. Backdonation was computed from the second order perturbation theory analysis on the Fock matrix by the sum of the corresponding E(2) energies involving the lone pairs of the central phosphorus atoms and the antibonding orbitals of neighboring phosphorus atoms.

|                                     | <b>8a</b> |           |           | <b>8b</b> |           |           | <b>8c</b> |           |           |
|-------------------------------------|-----------|-----------|-----------|-----------|-----------|-----------|-----------|-----------|-----------|
|                                     | <b>P1</b> | <b>P2</b> | <b>P3</b> | <b>P1</b> | <b>P2</b> | <b>P3</b> | <b>P1</b> | <b>P2</b> | <b>P3</b> |
| Natural Charge                      | 1.26      | -0.30     | 1.26      | 1.31      | -0.35     | 1.30      | 1.02      | -0.34     | 1.02      |
| Atomic contribution to the HOMO [%] | 6.5       | 70.5      | 8.6       | 5.99      | 70.5      | 6.4       | 5.9       | 72.1      | 7.3       |
| Back donation [kcal/mol]            | 62.0      |           |           | 56.7      |           |           | 58.6      |           |           |

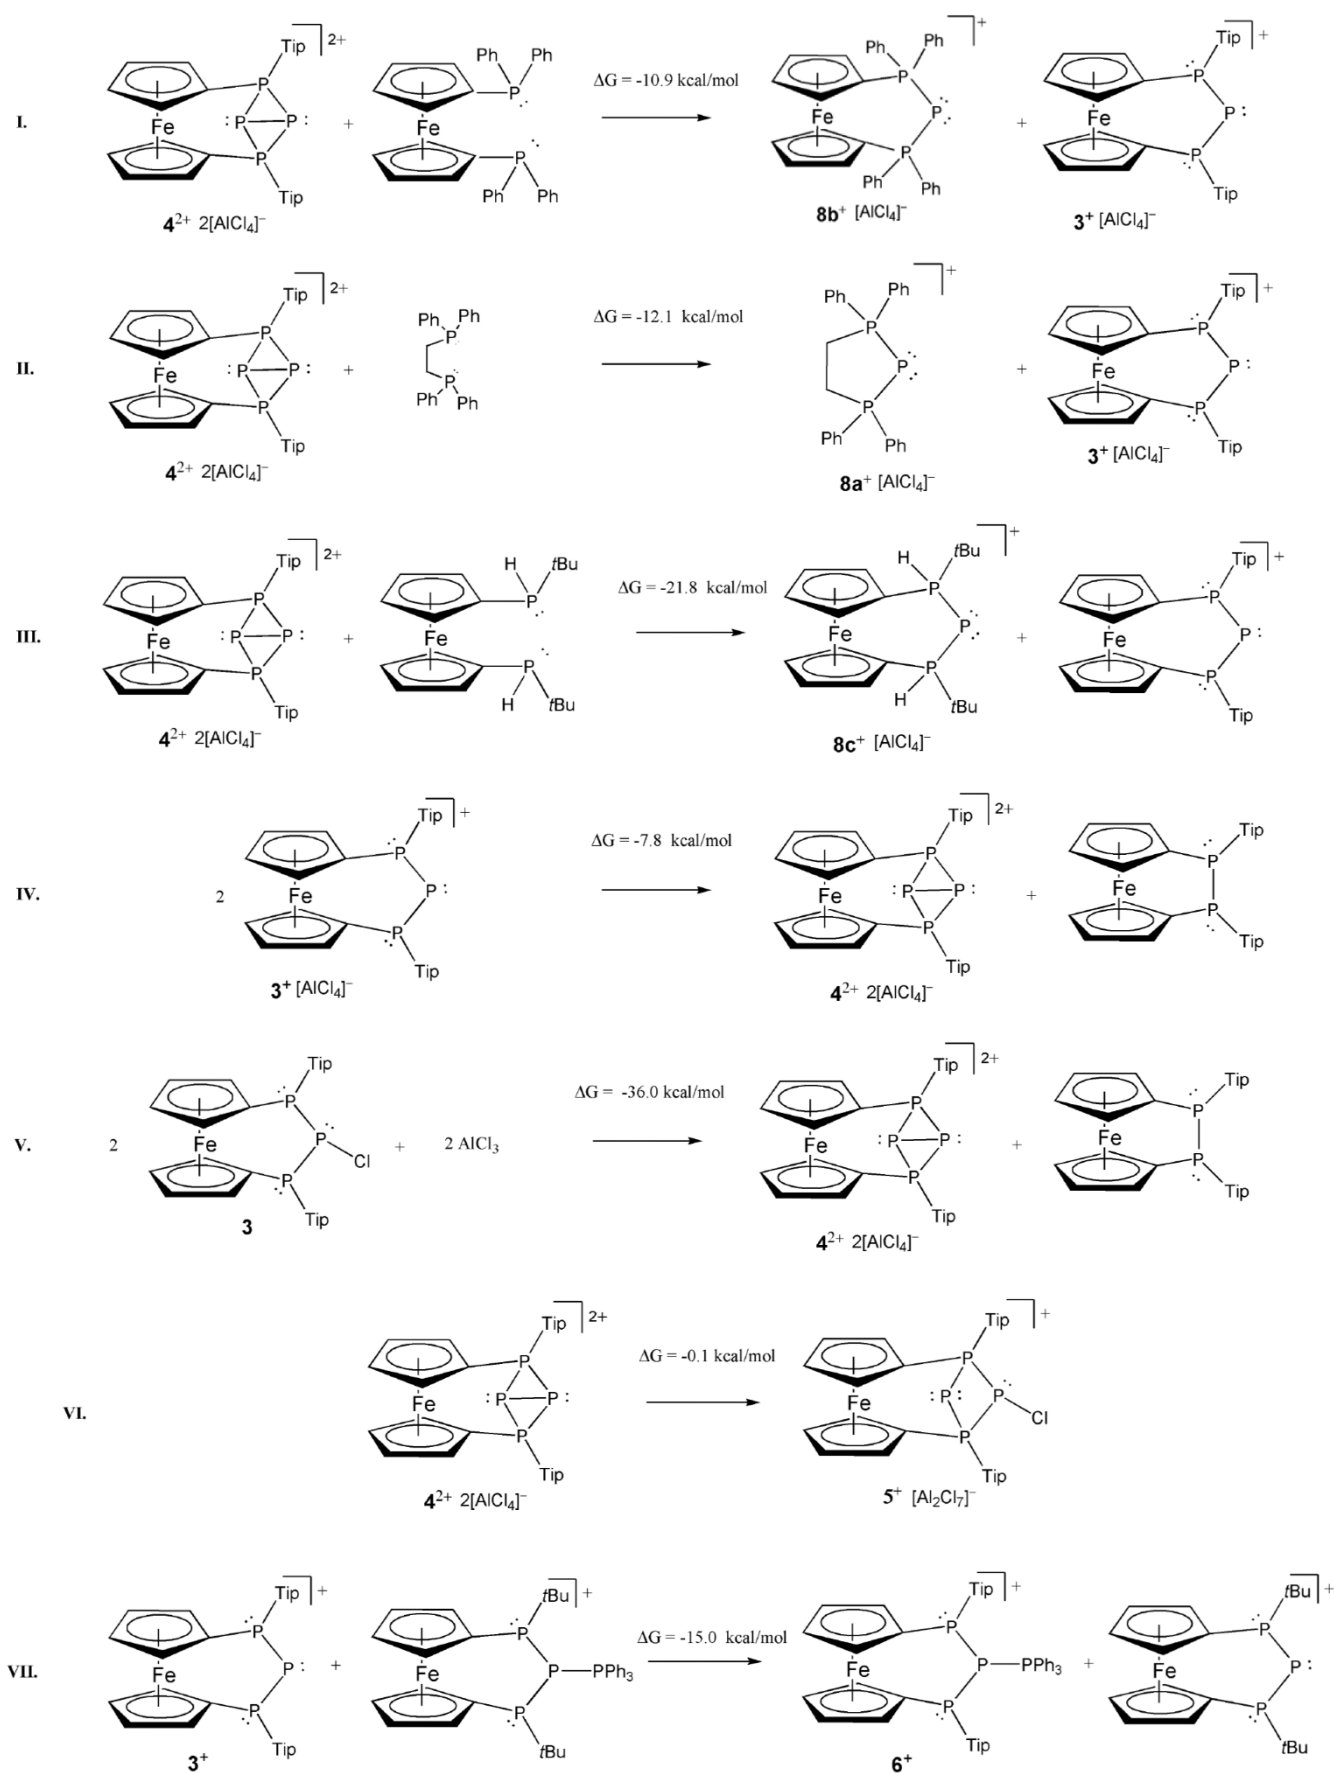

**Scheme S2:** Calculated reactions and their reaction Gibbs free energies. (Geometry optimizations were performed at  $\omega$ B97X-D/def2-TZVP. The energies of molecular ground states were then recomputed applying the PCM solvent model. Gibbs free energies (at 298 K) were calculated using these electronic energies with T $\Delta$ S contribution derived from frequency calculations at the  $\omega$ B97X-D/def2-TZVP level of theory.)

**Table S8:** Comparison of the reaction Gibbs free energies derived from the gas phase calculations ( $\Delta G_{\text{gas phase}}$ ) and after considering solvent effect ( $\Delta G_{\text{solvent}}$ ). (Geometry optimizations were performed at  $\omega$ B97X-D/def2-TZVP. The energies of molecular ground states were then recomputed applying the PCM solvent model. Gibbs free energies (at 298 K) were calculated using these electronic energies with T $\Delta$ S contribution derived from frequency calculations at the  $\omega$ B97X-D/def2-TZVP level of theory.)

|             | $\Delta G_{\text{gas phase}}$ [kcal/mol] | $\Delta G_{\text{solv.corr}}$ [kcal/mol] |
|-------------|------------------------------------------|------------------------------------------|
| <b>I.</b>   | -19.3                                    | -10.9                                    |
| <b>II.</b>  | -22.6                                    | -12.1                                    |
| <b>III.</b> | -34.8                                    | -21.8                                    |
| <b>IV.</b>  | 1.8                                      | -7.8                                     |
| <b>V.</b>   | -13.2                                    | -36.0                                    |
| <b>VI.</b>  | -22.7                                    | -0.1                                     |
| <b>VII.</b> | -13.7                                    | -15.0                                    |

### Further discussion of the bonding situation of $4^{2+}$

During the NBO analysis discussed in this section a local subset was defined and used, where only the  $P_4$  unit and the directly connected carbon atoms were considered. These calculations were carried out at the  $\omega$ B97X-D/def2-SVP//  $\omega$ B97X-D/def2-TZVP level of theory. The second order perturbation analysis of the Fock matrix (on NBO basis) revealed strong donor-acceptor interactions between the P-P bonds and neighboring antibonding orbitals. The P2-P3 bond exhibits a stronger donating ability (22.0 kcal/mol), than the others (P1-P2: 11.4 kcal/mol, P1-P3: 12.3 kcal/mol). This effect can also be observed in NHO Directionality analysis, where the deviation of the hybrid direction from the line of centers between the two nuclei (deviation angle [ $^\circ$ ]) is indeed larger (P1-P2, P1-P3:  $16.5^\circ$  P2-P3:  $19.9^\circ$ ). The direction of this donor-acceptor interaction is mainly towards the antibonding orbitals between the pillar atoms of the cage and the *ipso*-carbon atoms, which aligns with the shapes of the Kohn-Sham orbitals computed. Additionally, natural resonance theory (NRT) was utilized to compute the natural bond orders, and resonance structures. The natural bond order reveals that the bonds between the adjoining phosphorus atoms of the cage is mainly (90%) covalent. The central bond can be considered purely covalent ( $\sim 100\%$ ). NRT analysis showed that only one leading resonance structure exist with 70%, which is identical with the Lewis structure depicted in Scheme 1.

To highlight the reactive sites of  $4^{2+}$ , the orbital-weighted Fukui function was used to compute the dual descriptor ( $\Delta f_w$ ) values of possible sites susceptible to a nucleophilic attack. Several maxima of the  $\Delta f_w$  have been identified on the corresponding isosurface near the phosphorus cage. Based on these values, it can be concluded that  $4^{2+}$  is prone to attack on both sides of the central P atoms.

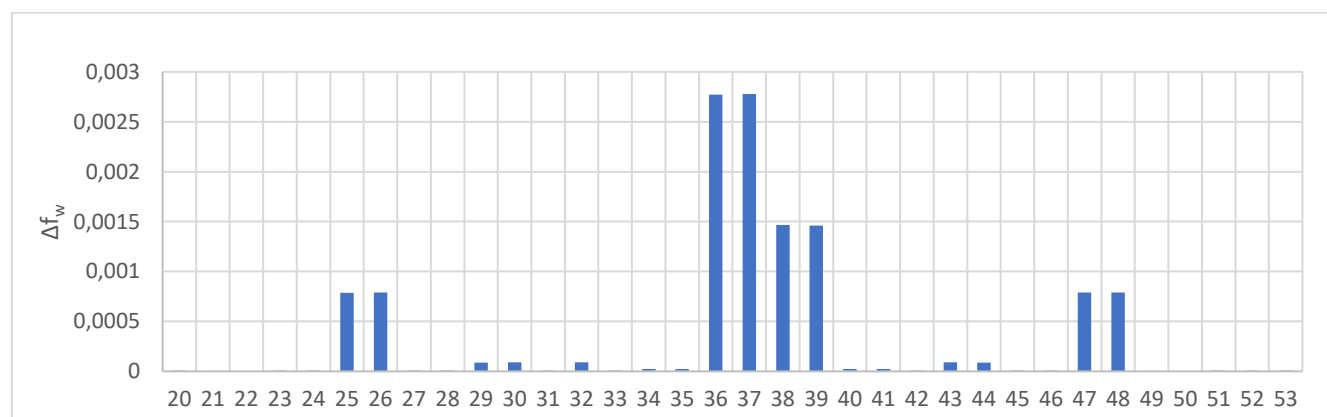

**Figure S5:**  $\Delta f_w$  values for the identified maxima on the Fukui function for  $4^{2+}$  ( $\omega$ B97X-D/def2-TZVP).

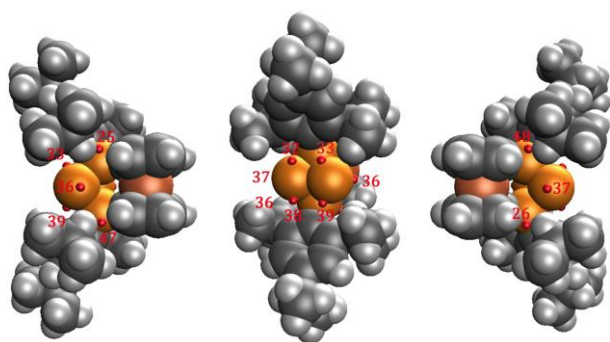

**Figure S6:** Maxima sites (Fukui function) represented on the space filling scheme of  $4^{2+}$  ( $\omega$ B97X-D/def2-TZVP).

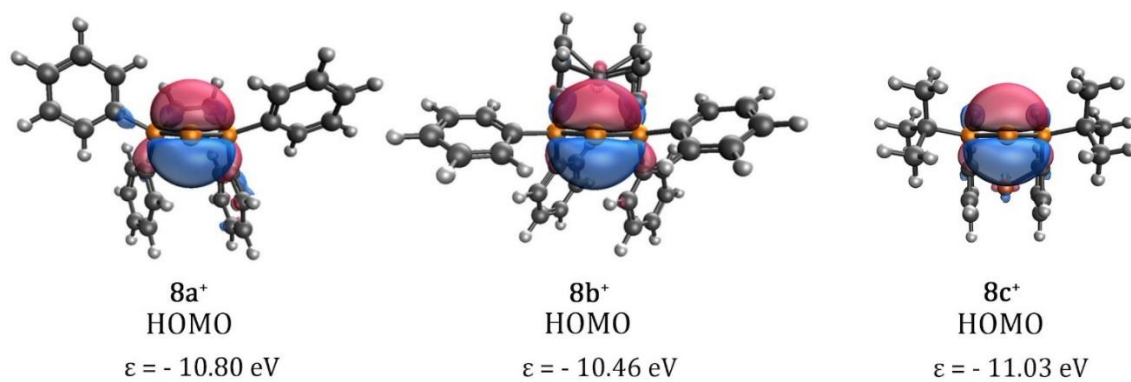

**Figure S7:** The HOMO of  $8a^+$ ,  $8b^+$  and  $8c^+$  at  $\omega$ B97X-D/def2-TZVP (isovalue=0.05).

## P<sup>+</sup> transfer and related reactions

Products and by-products of the P<sup>+</sup> transfer reactions have been identified on an NMR scale based on their characteristic spectra.

### General procedure P<sup>+</sup> transfer

To a solution of 5 mg **4**[AlCl<sub>4</sub>]<sub>2</sub> in 0.5 ml dichloromethane 20 mg of neat dppe were added at room temperature in an NMR tube. The NMR tube was closed and the mixture gently shaken three times. The formation of literature known **8a** is confirmed by <sup>31</sup>P NMR spectroscopy.<sup>19</sup> Replacing dppe by dppf or **7** affords **8b** and **8c** in a similar manner, out of which **8b** has been described before.<sup>20</sup> A superior procedure to **8c** has been described in the synthetic protocol section earlier in this supporting information.

<sup>31</sup>P{<sup>1</sup>H}-NMR spectrum of **8a**[AlCl<sub>4</sub>] obtained via P<sup>+</sup> transfer (signals marked with asterisks refer to the byproduct as further outlined below):

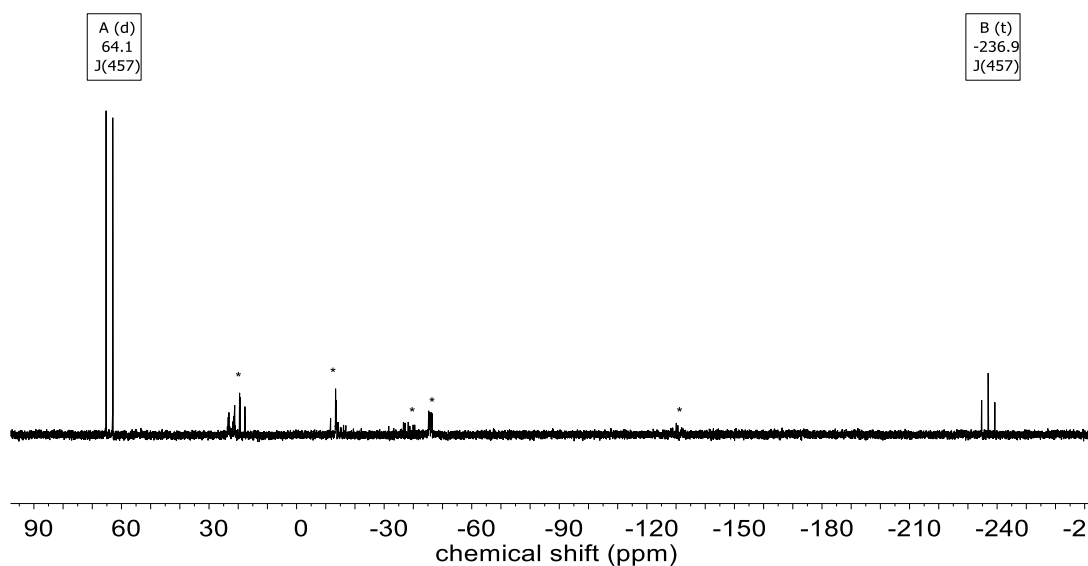

<sup>31</sup>P{<sup>1</sup>H}-NMR spectrum of **8b**[AlCl<sub>4</sub>] obtained via P<sup>+</sup> transfer (signals marked with asterisks refer to the byproduct as further outlined below):

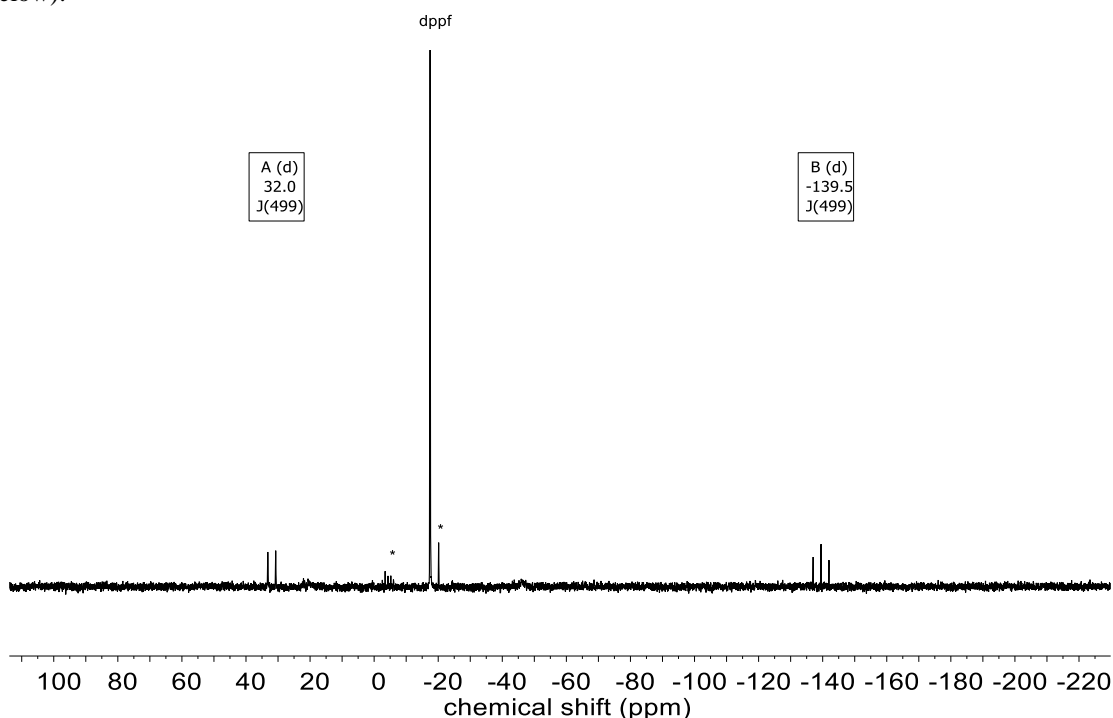

$^{31}\text{P}\{^1\text{H}\}$ -NMR of  $\mathbf{8c}[\text{AlCl}_4]$  obtained via  $\text{P}^+$  transfer (signals marked with asterisks refer to the byproduct as further outlined below):

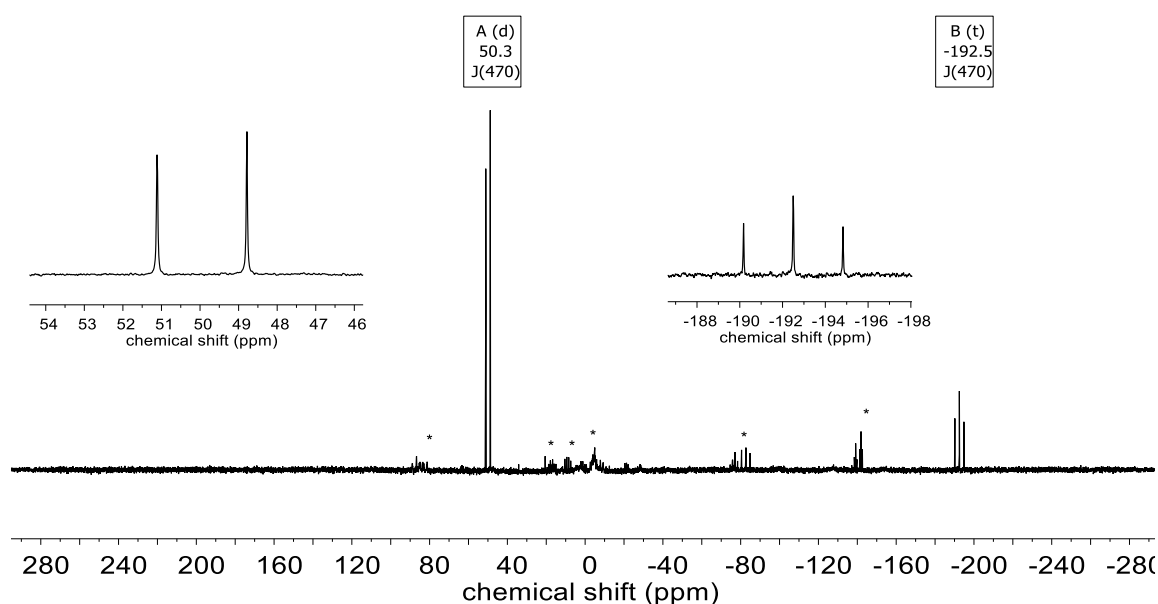

Targeted formation of the by-product observed during  $\text{P}^+$  transfer

As outlined in the main manuscript and summarized below in Scheme S3, the initial side product of the  $\text{P}^+$  transfer is the free phosphonium ion  $\mathbf{3}^+$ , which is not stable and reacts further, e.g. with the bisphosphanes added as  $\text{P}^+$  acceptors. We were able to identify the follow-up product of the free phosphonium ion  $\mathbf{3}^+$  as the corresponding mono phosphane adduct of the phosphonium ion (Scheme S3 and Figure S8 and S9) comparable to the  $\text{PPh}_3$  adduct  $\mathbf{6}^+$  (see Scheme 1). Furthermore, we have investigated the targeted formation of the by-product via *in situ* phosphonium ion generation starting from  $\mathbf{3}$  with  $\text{AlCl}_3$  in the presence of dppf and dppe (Scheme S3), which leads to the formation of the same products, now as main products, in support of the above-mentioned assignment for the by-product observed during  $\text{P}^+$  transfer.

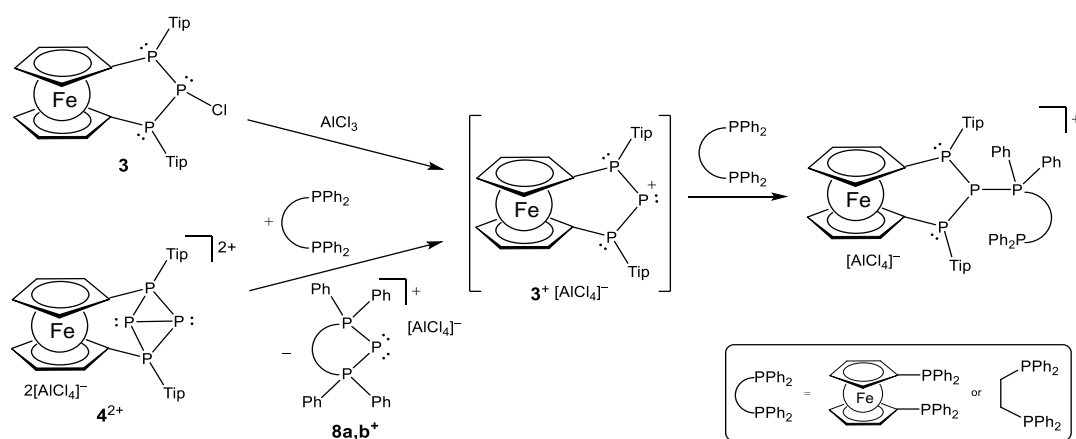

**Scheme S3:** Illustration of the by-product formed during  $\text{P}^+$ -transfer from  $\mathbf{4}^{2+}$  (lower path) vs. targeted formation of this by product via the *in situ* formed phosphonium ion ( $\mathbf{3}^+$ ) obtained by chloride abstraction starting from  $\mathbf{3}$  (higher path) with dppf or dppe.



$^{31}\text{P}\{^1\text{H}\}$ -NMR spectrum of *in situ* reaction of phosphonium ion ( $3^+$ ) with dppe in  $\text{CD}_2\text{Cl}_2$  at room temperature.

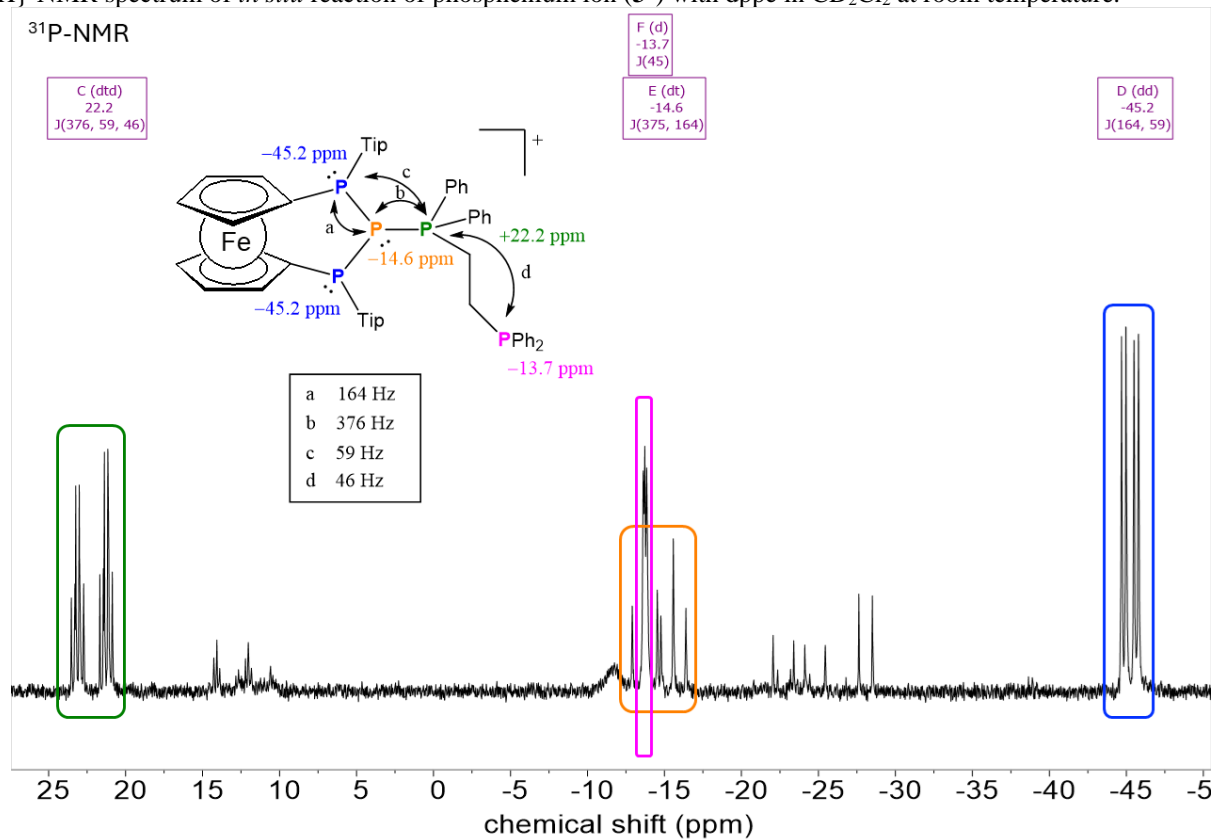

$^{31}\text{P}\{^1\text{H}\}$ -NMR spectrum of *in situ* reaction of phosphonium ion ( $3^+$ ) with dppf in  $\text{CD}_2\text{Cl}_2$  at room temperature:

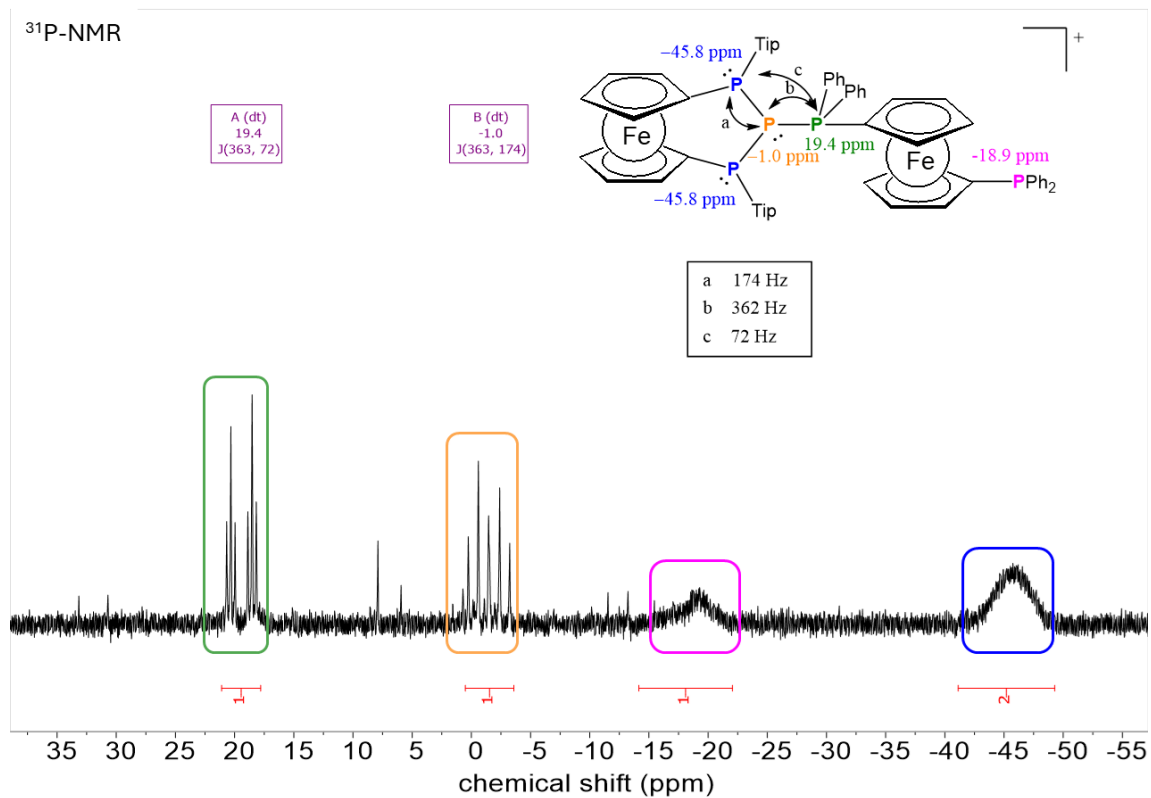

## NMR spectra of isolated new compounds

On the following pages the NMR-spectra of compounds **2**, **3**, **4**[AlCl<sub>4</sub>]<sub>2</sub>, **5**[Al<sub>2</sub>Cl<sub>7</sub>], **6**[AlCl<sub>4</sub>] and **8c**[BF<sub>4</sub>] are depicted and sorted by compound:

NMR-spectra of **2**:

<sup>31</sup>P{<sup>1</sup>H}-NMR

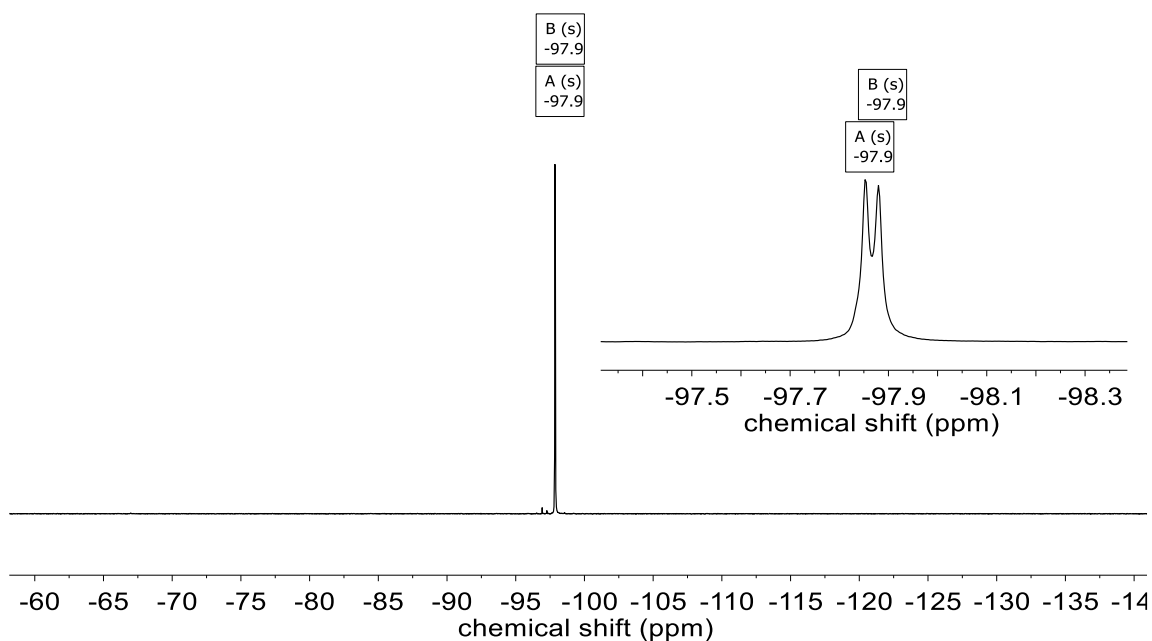

<sup>1</sup>H-NMR

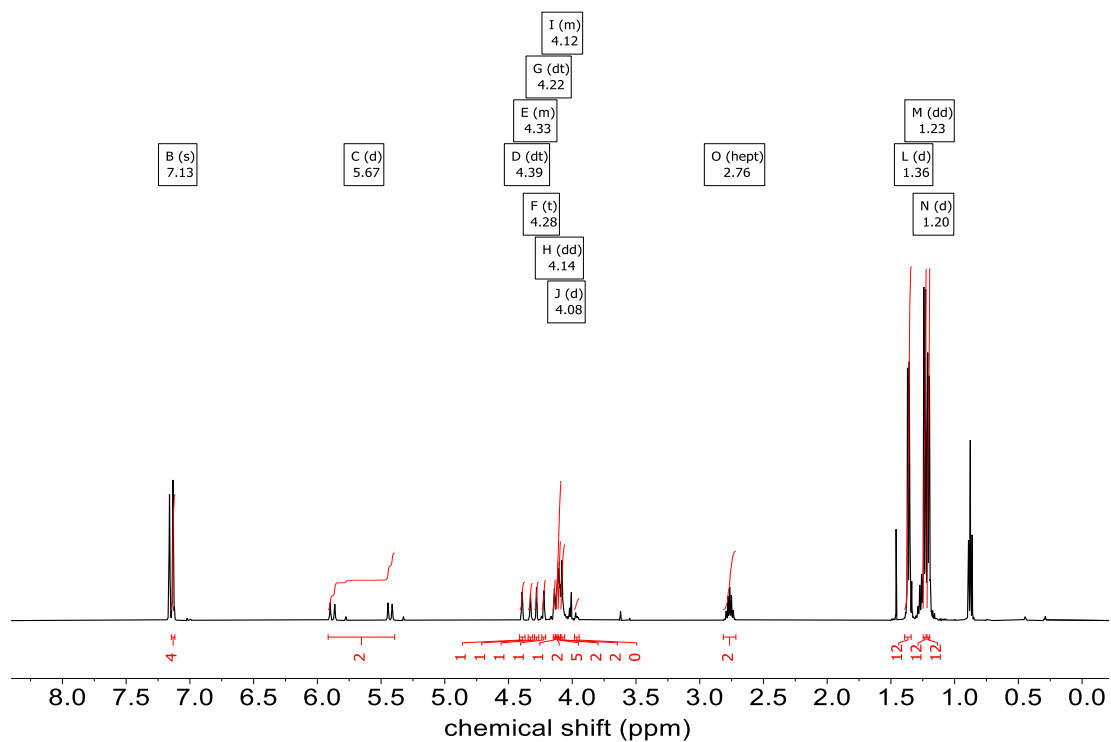

<sup>13</sup>C-NMR

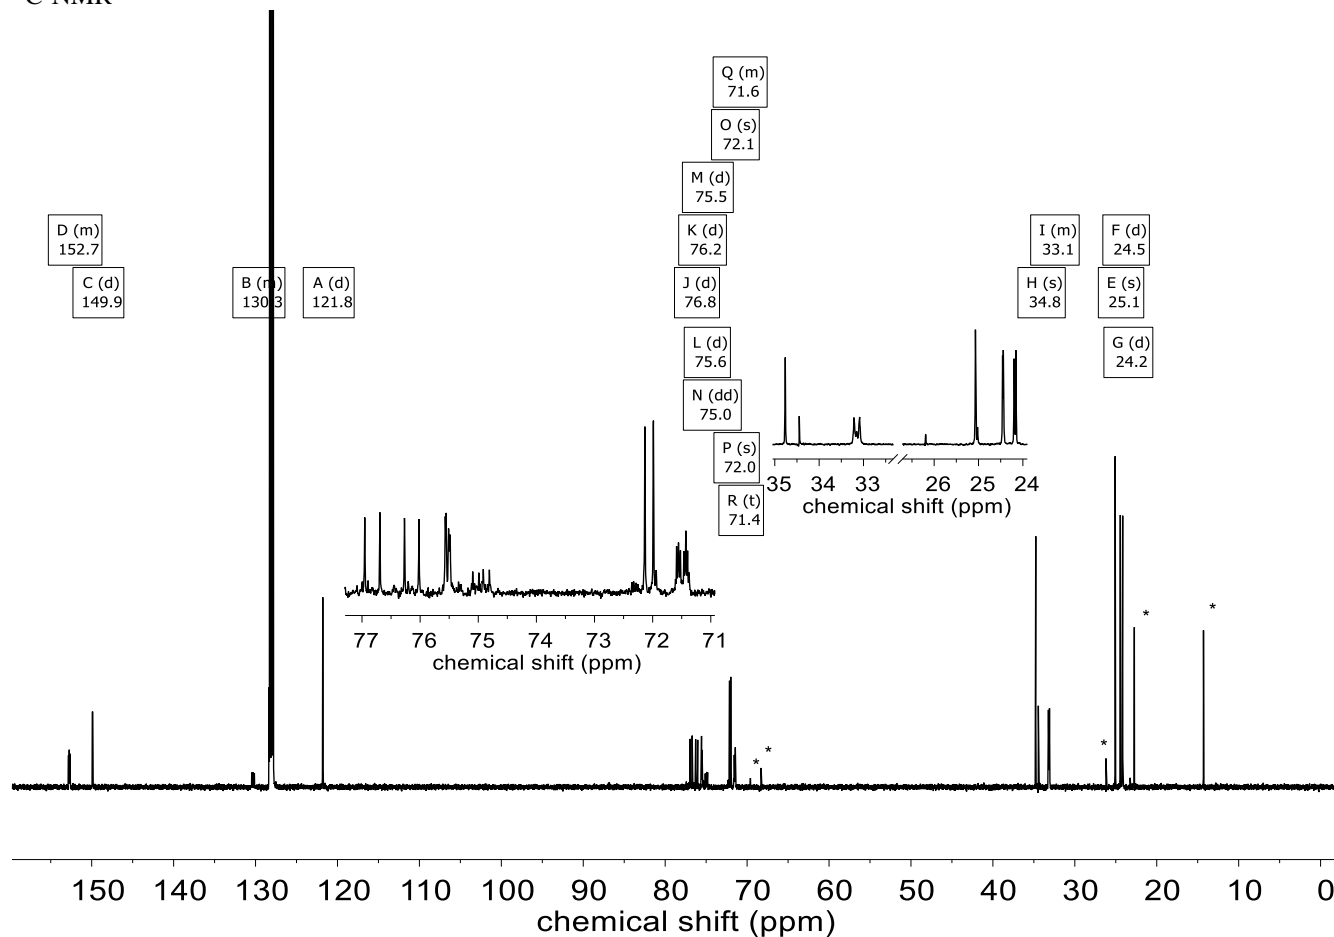

CH-HSQC

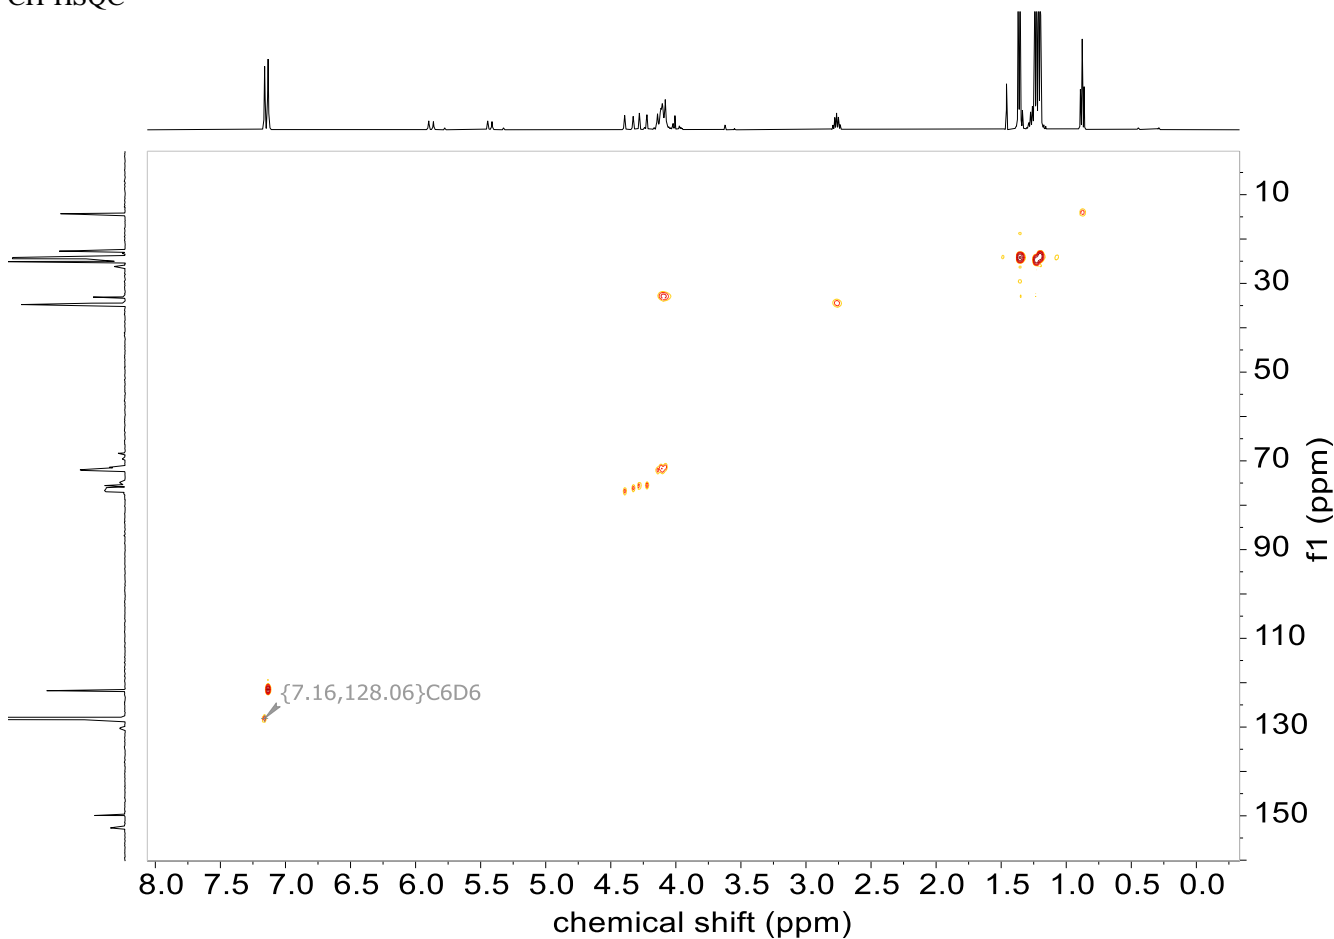

CH-HMBC

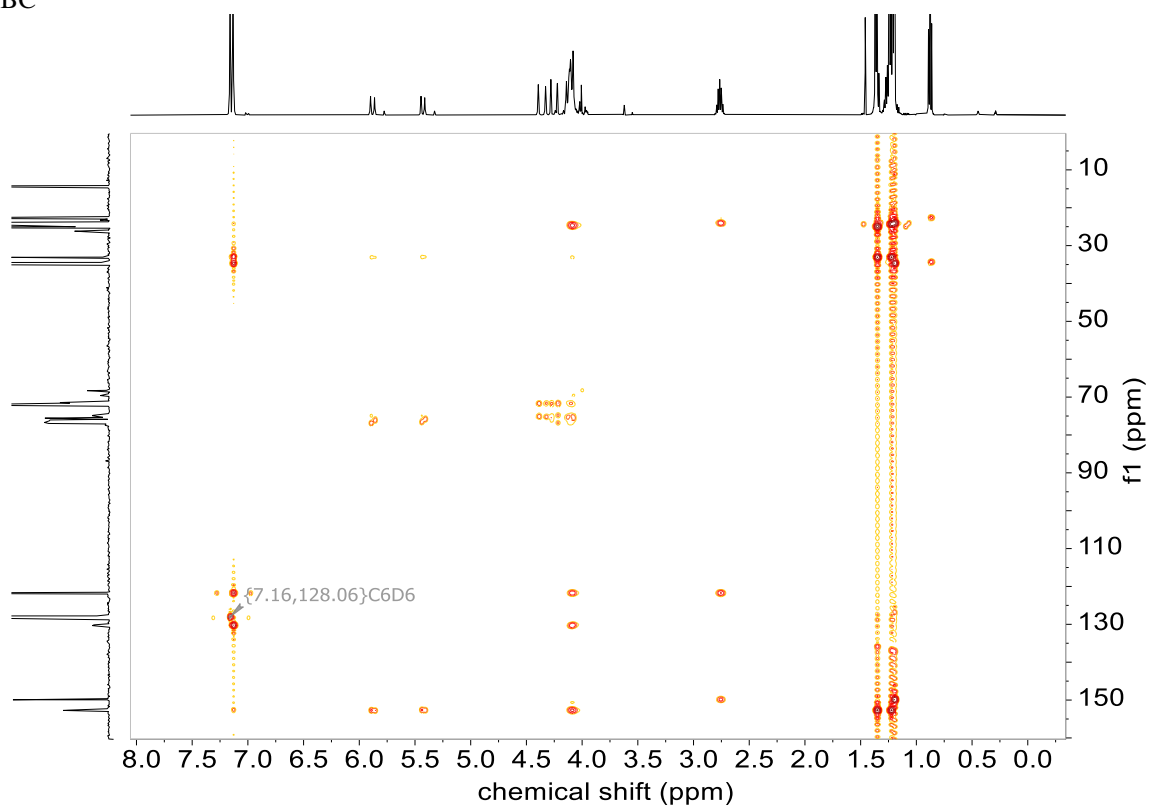

NMR-spectra of **3**:

$^{31}\text{P}\{^1\text{H}\}$ -NMR

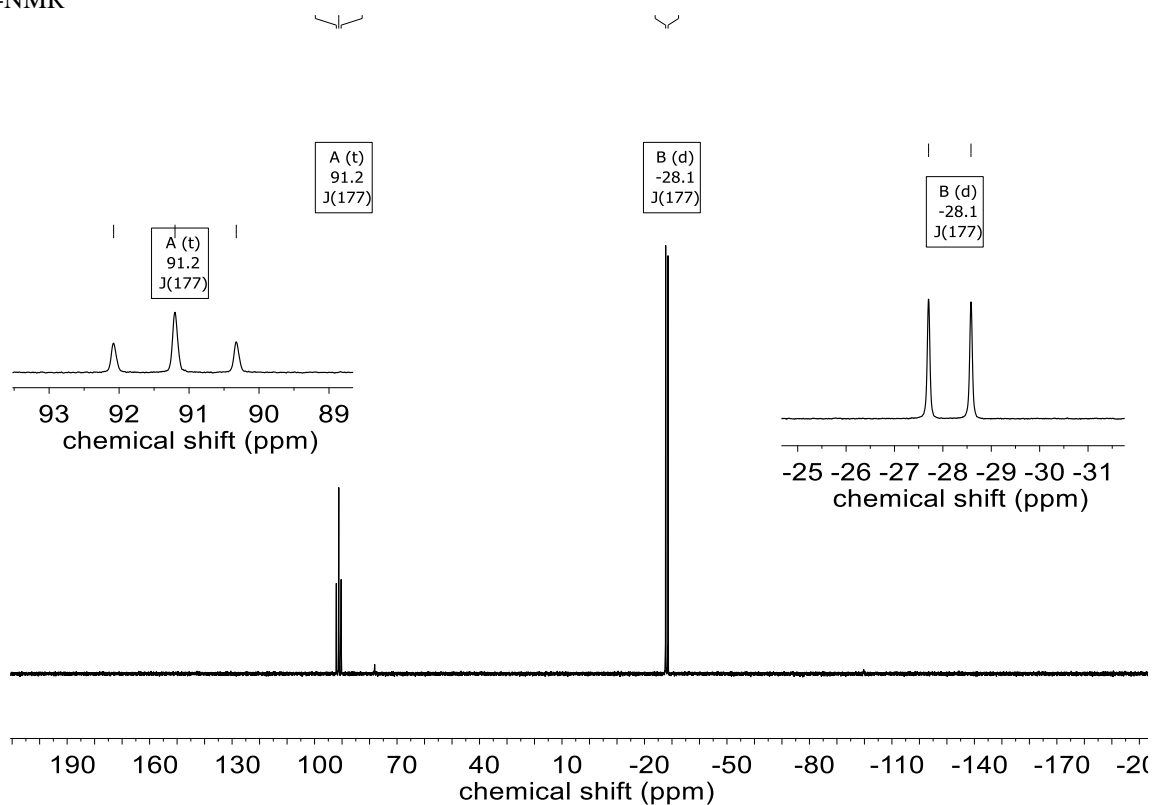

$^1\text{H}$ -NMR

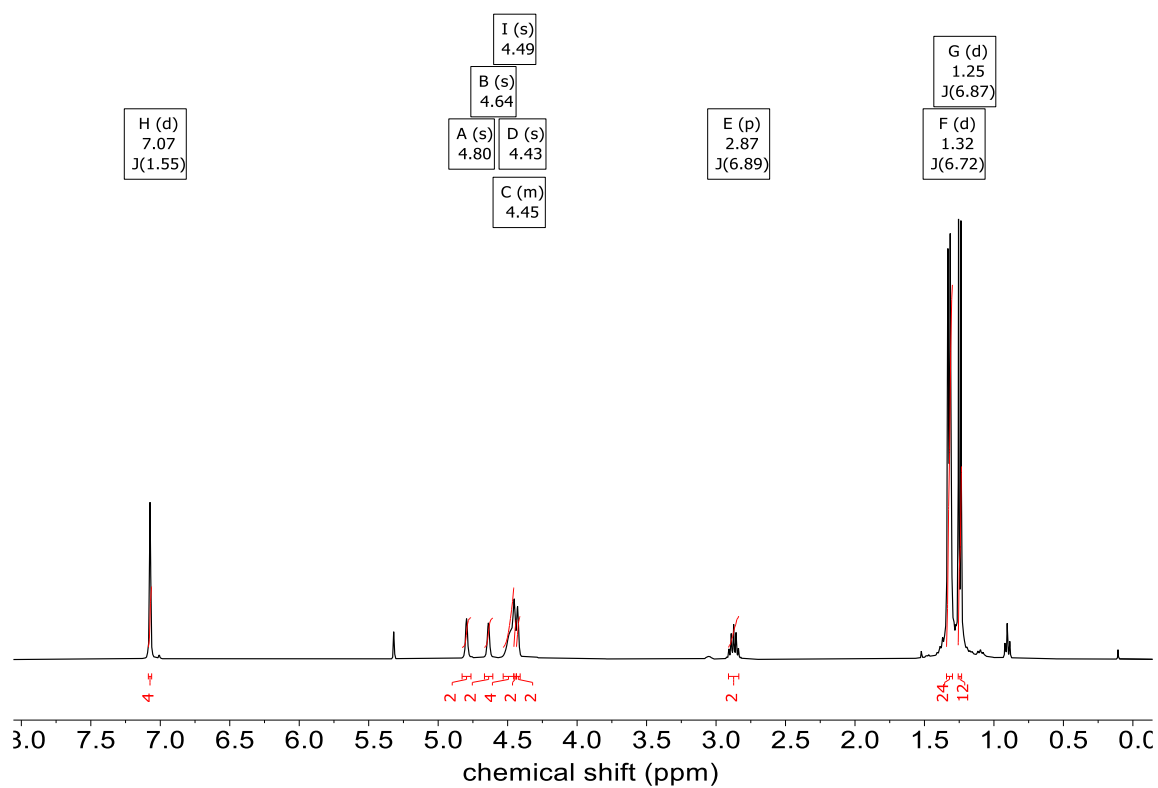

<sup>13</sup>C-NMR

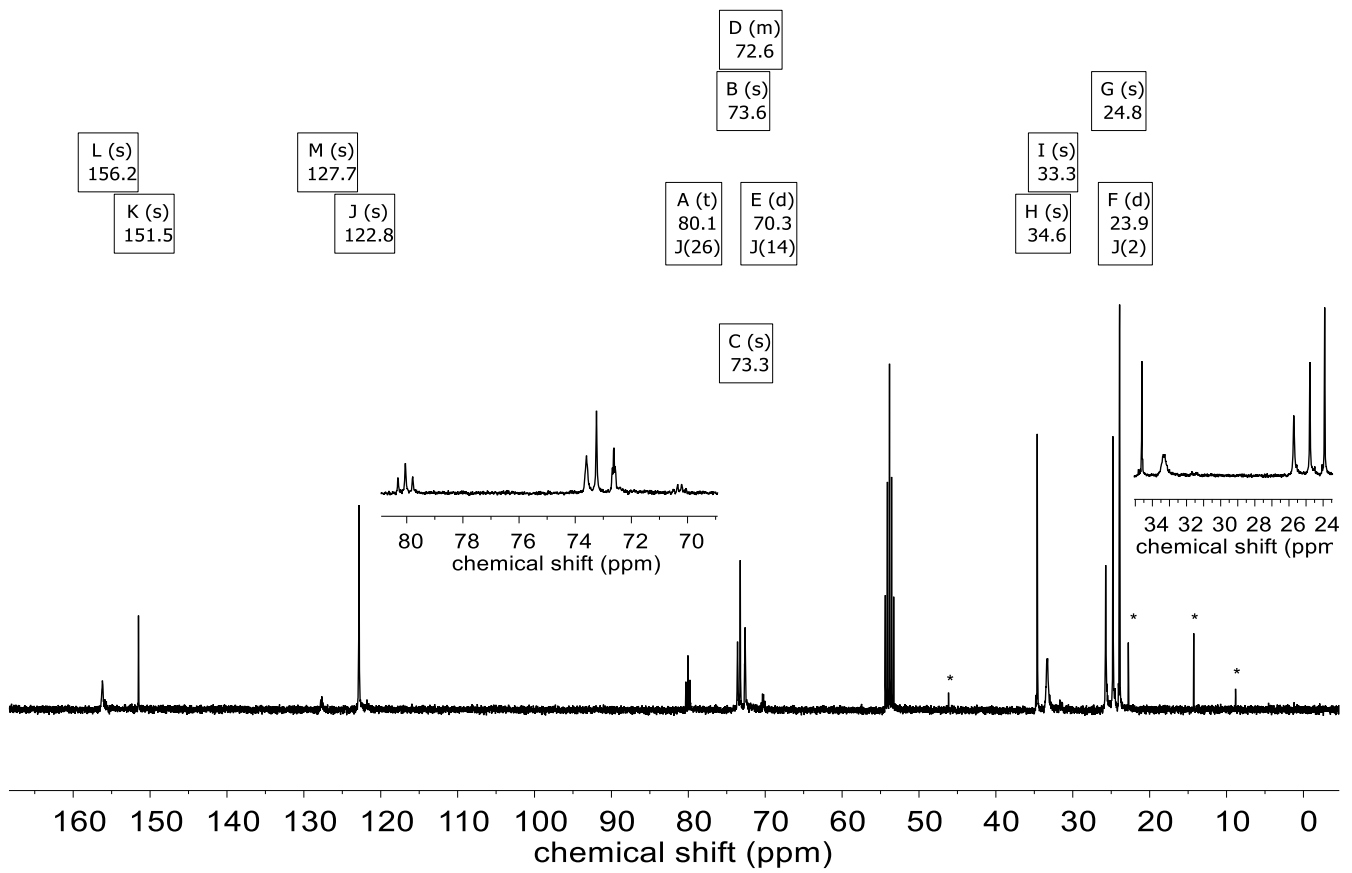

CH-HSQC

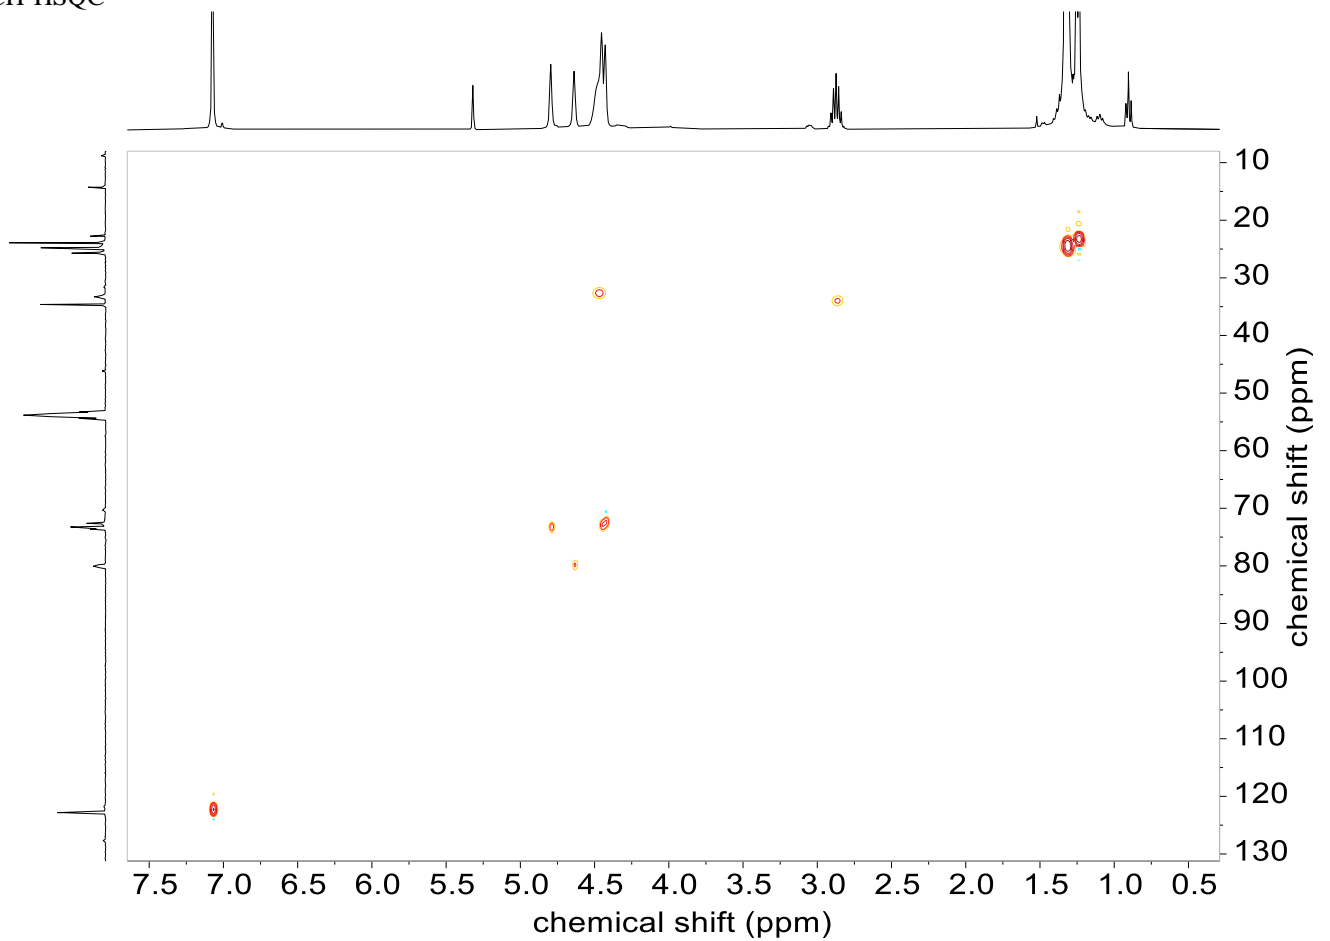

NMR-spectra of  $4[AlCl_4]_2$ :  
 $^1H$ -NMR

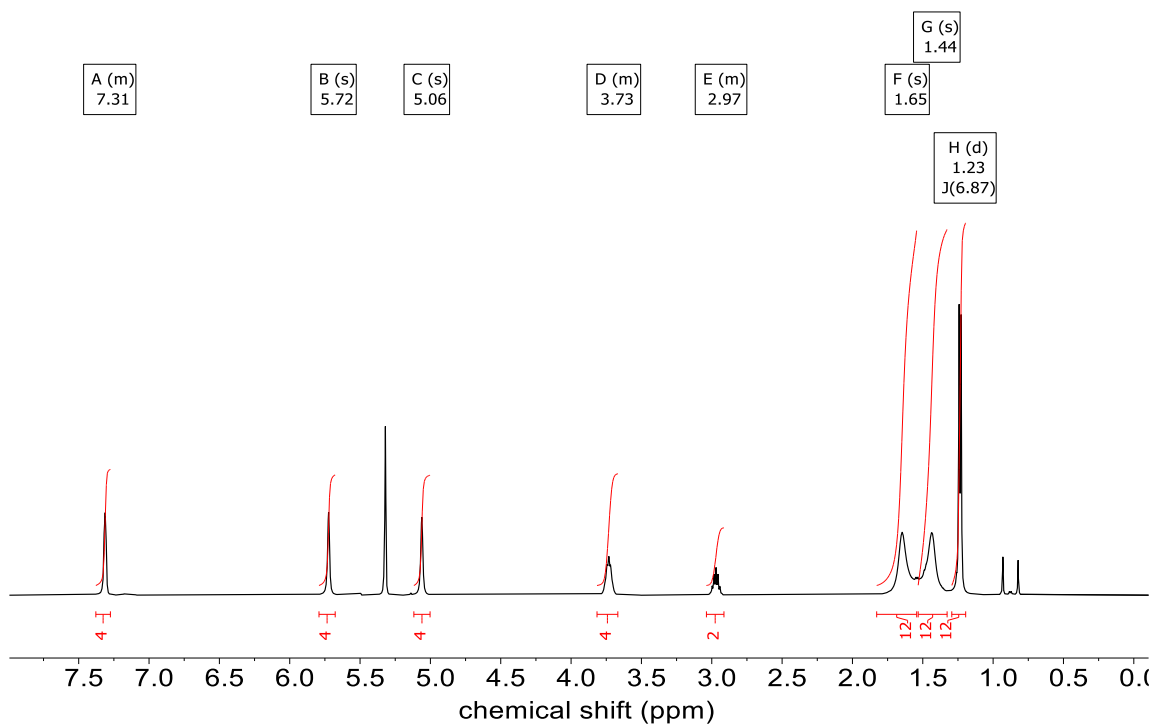

$^{13}C$ -NMR

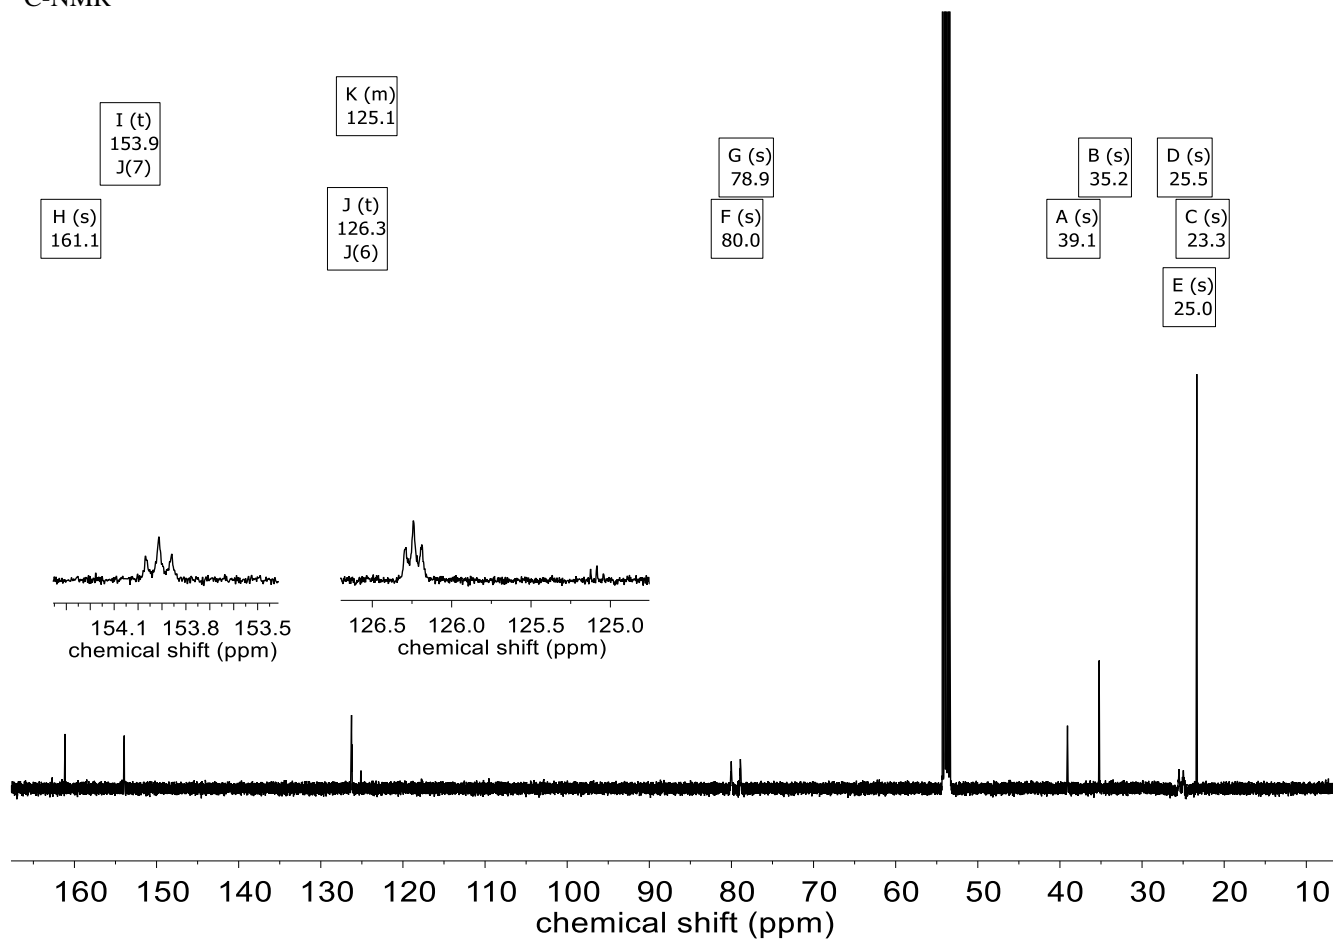

<sup>27</sup>Al-NMR

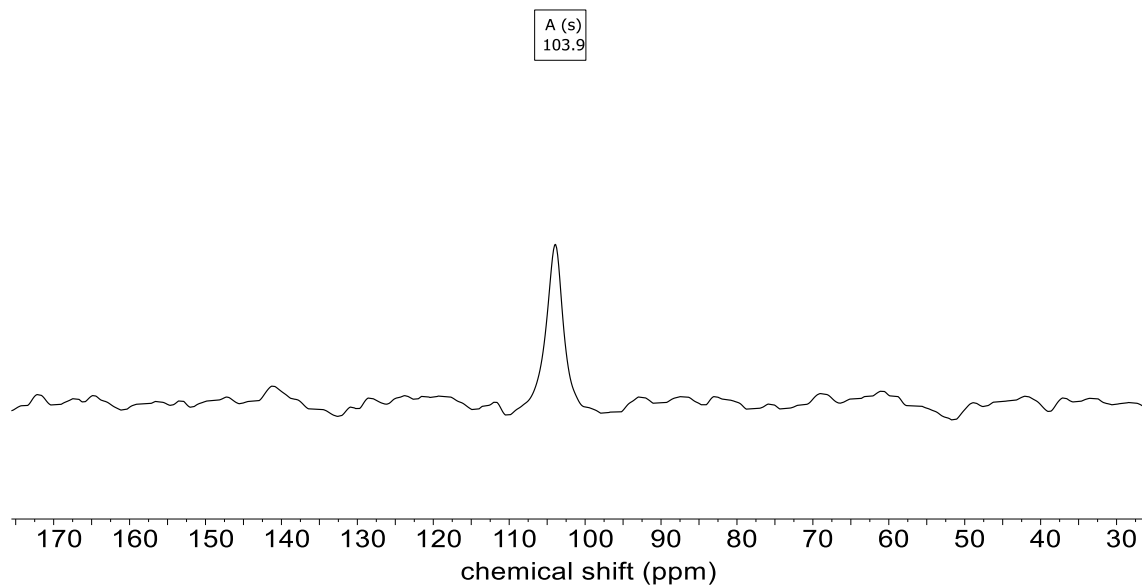

<sup>31</sup>P-NMR

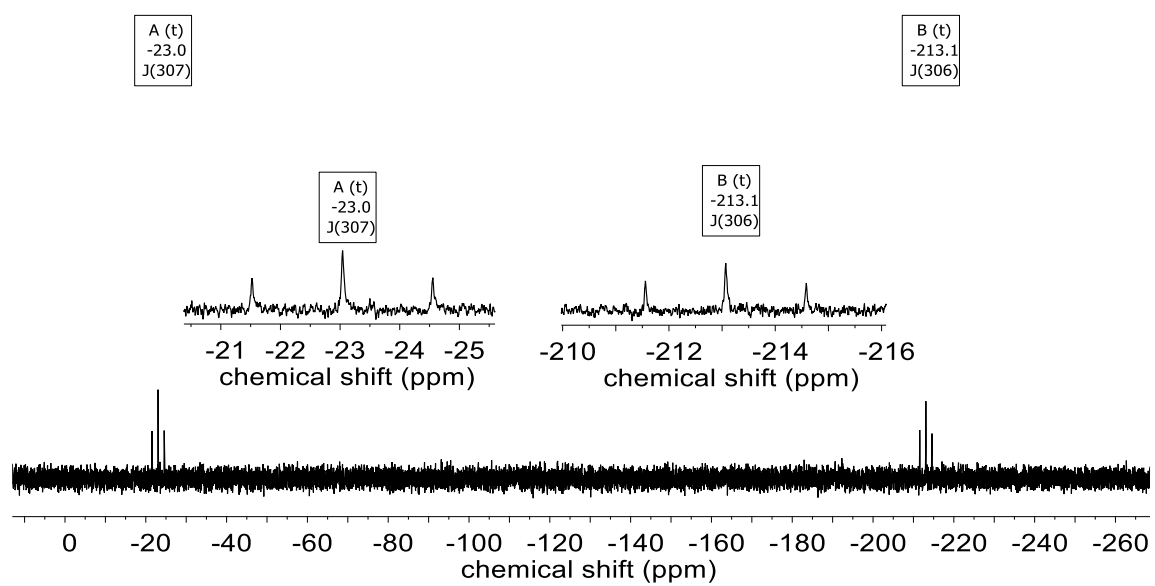



NMR-spectra of **5**[Al<sub>2</sub>Cl<sub>7</sub>]:  
<sup>31</sup>P-NMR

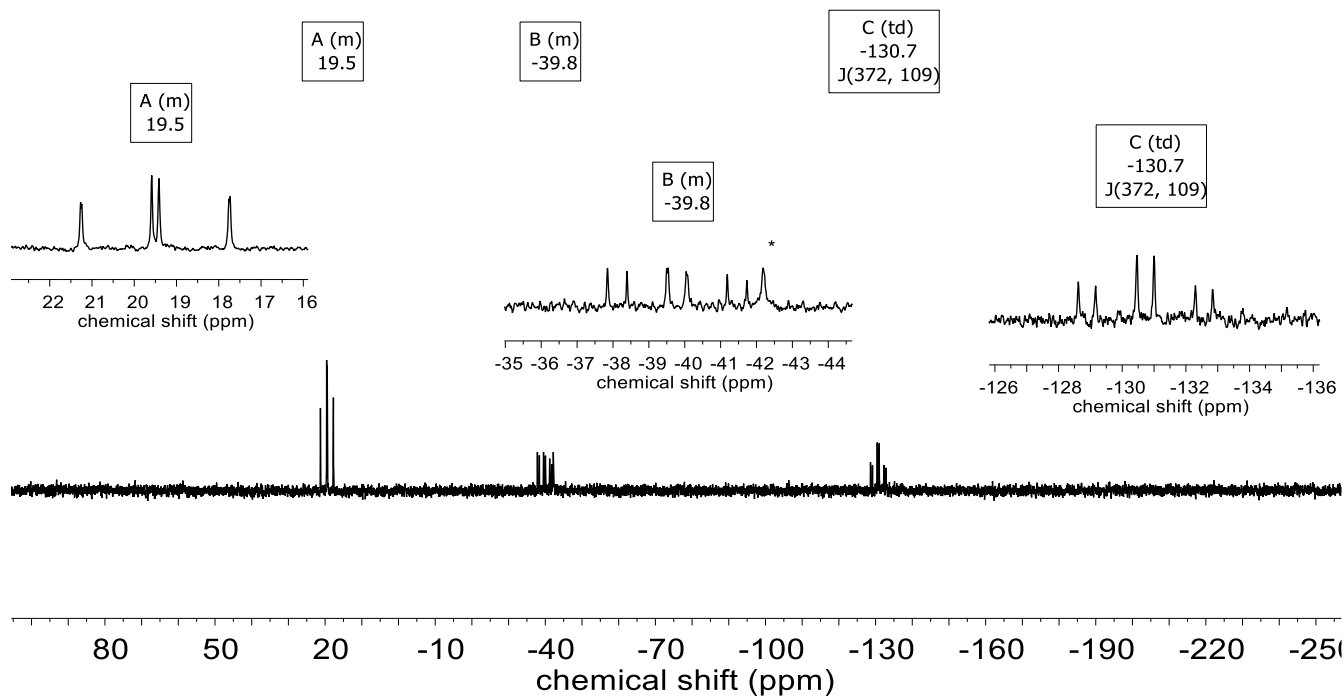

<sup>1</sup>H-NMR

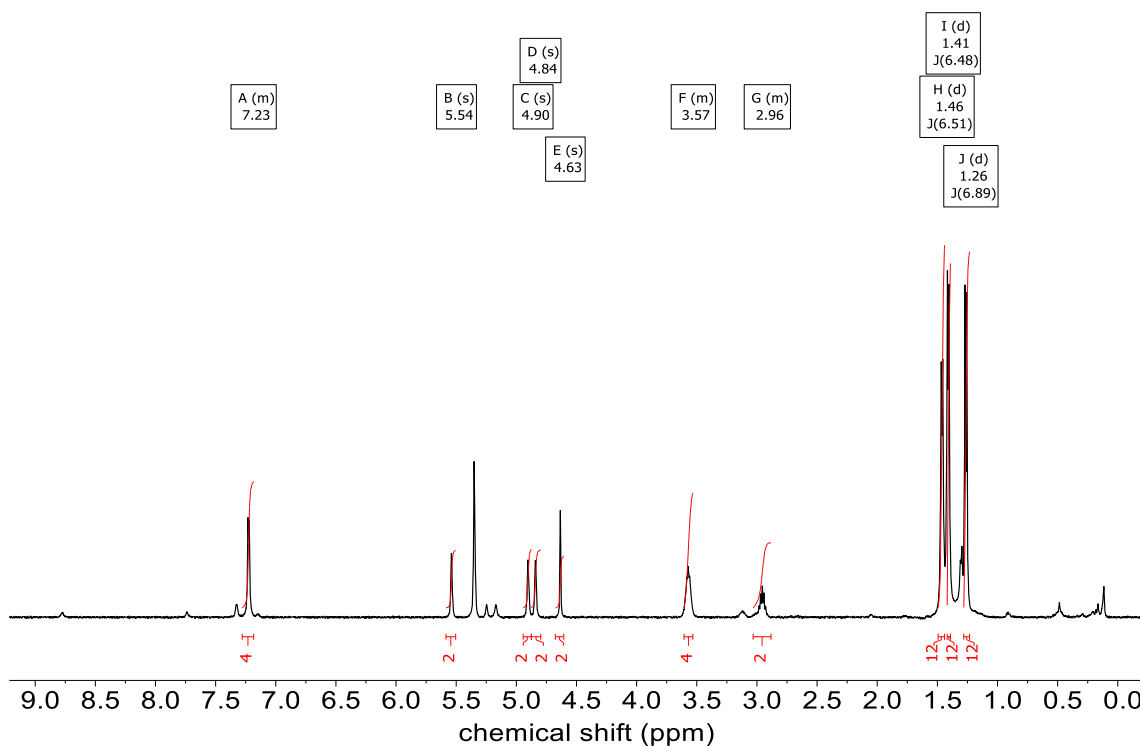

CH-HMBC

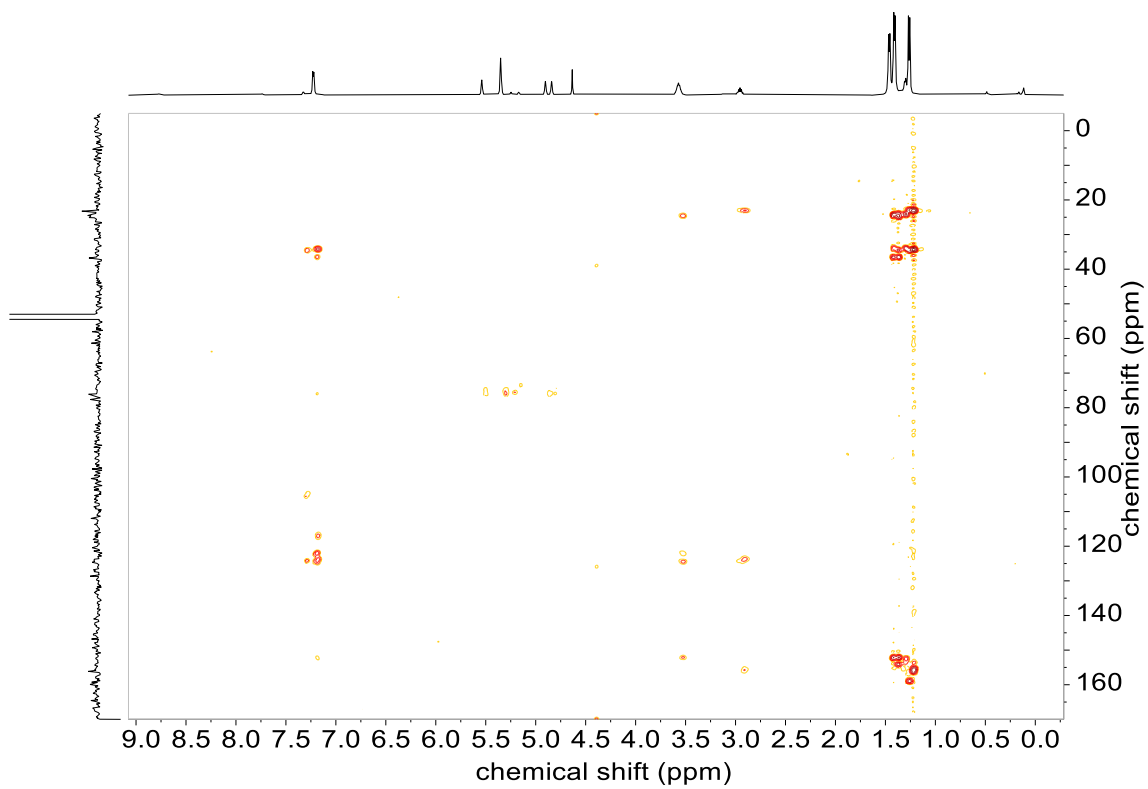

<sup>27</sup>Al-NMR

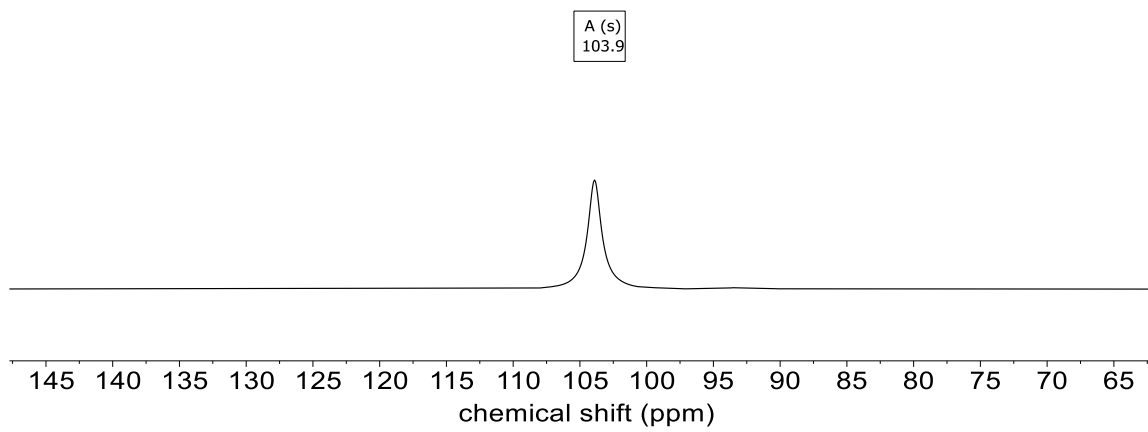

NMR-spectra of **6**[AlCl<sub>4</sub>]:  
<sup>31</sup>P-NMR

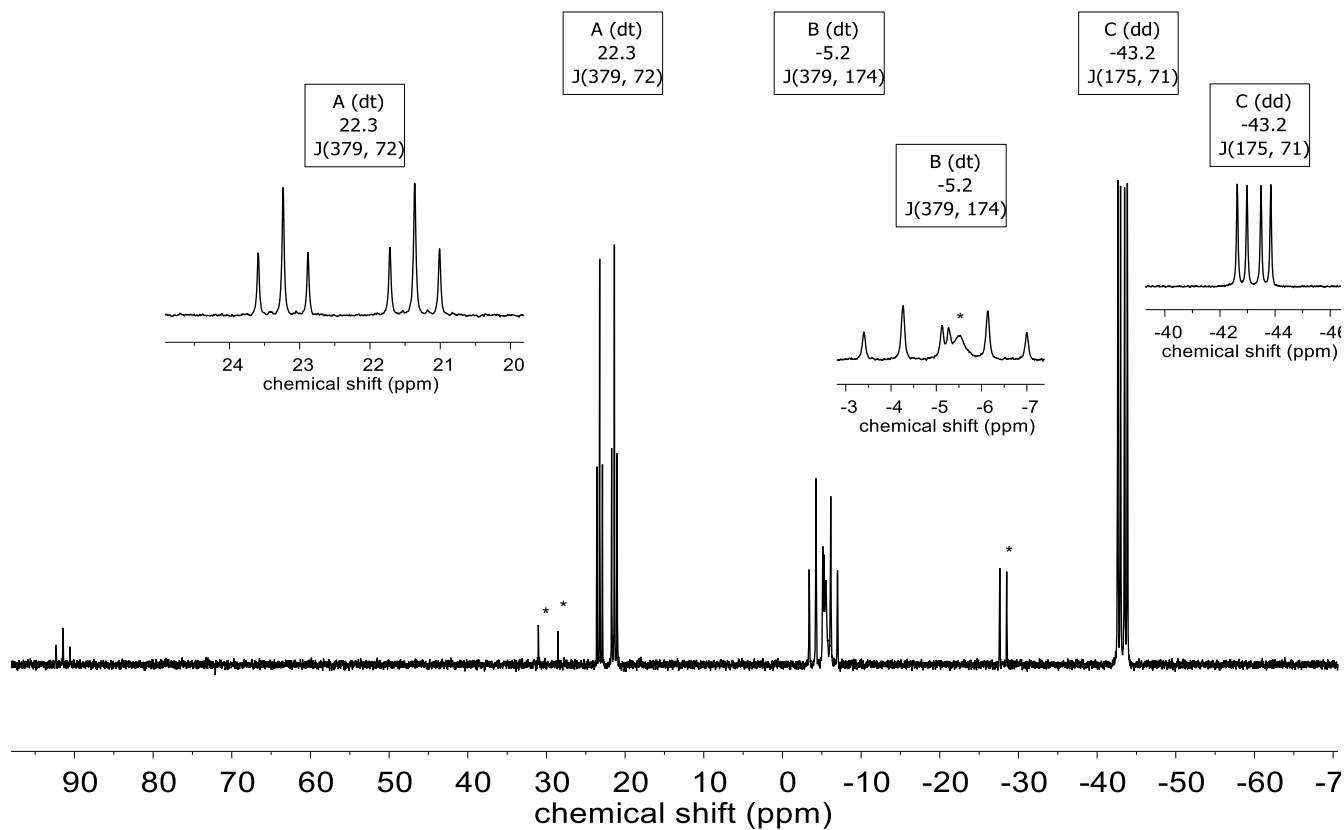

<sup>1</sup>H-NMR

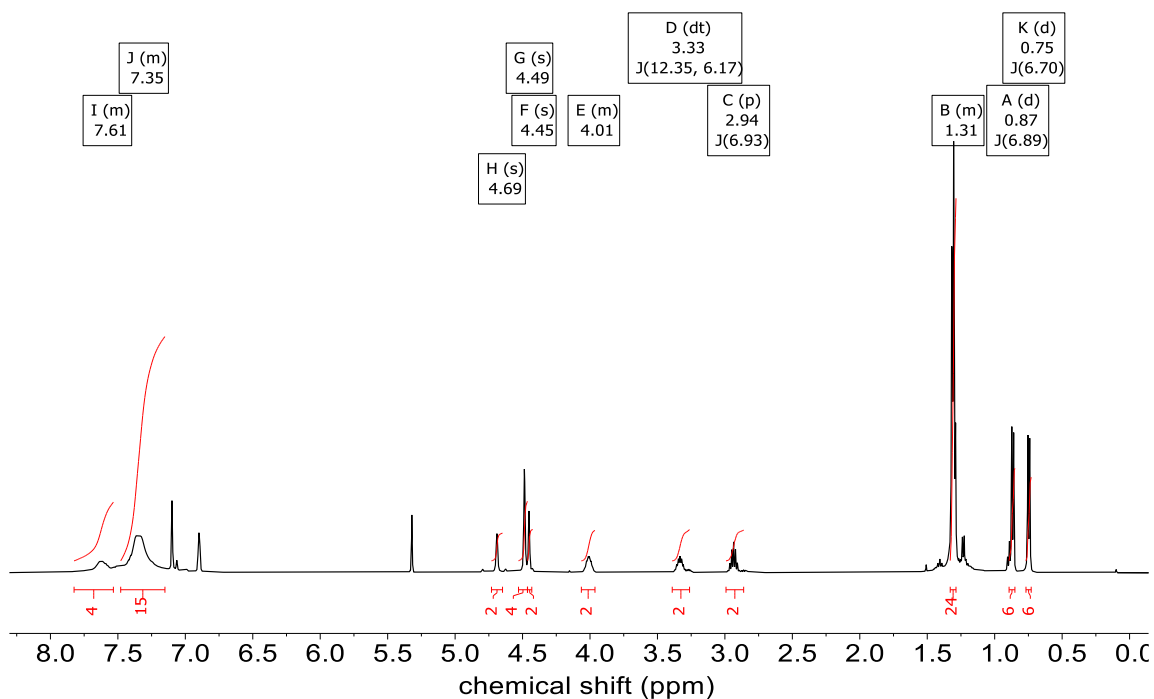

<sup>13</sup>C-NMR

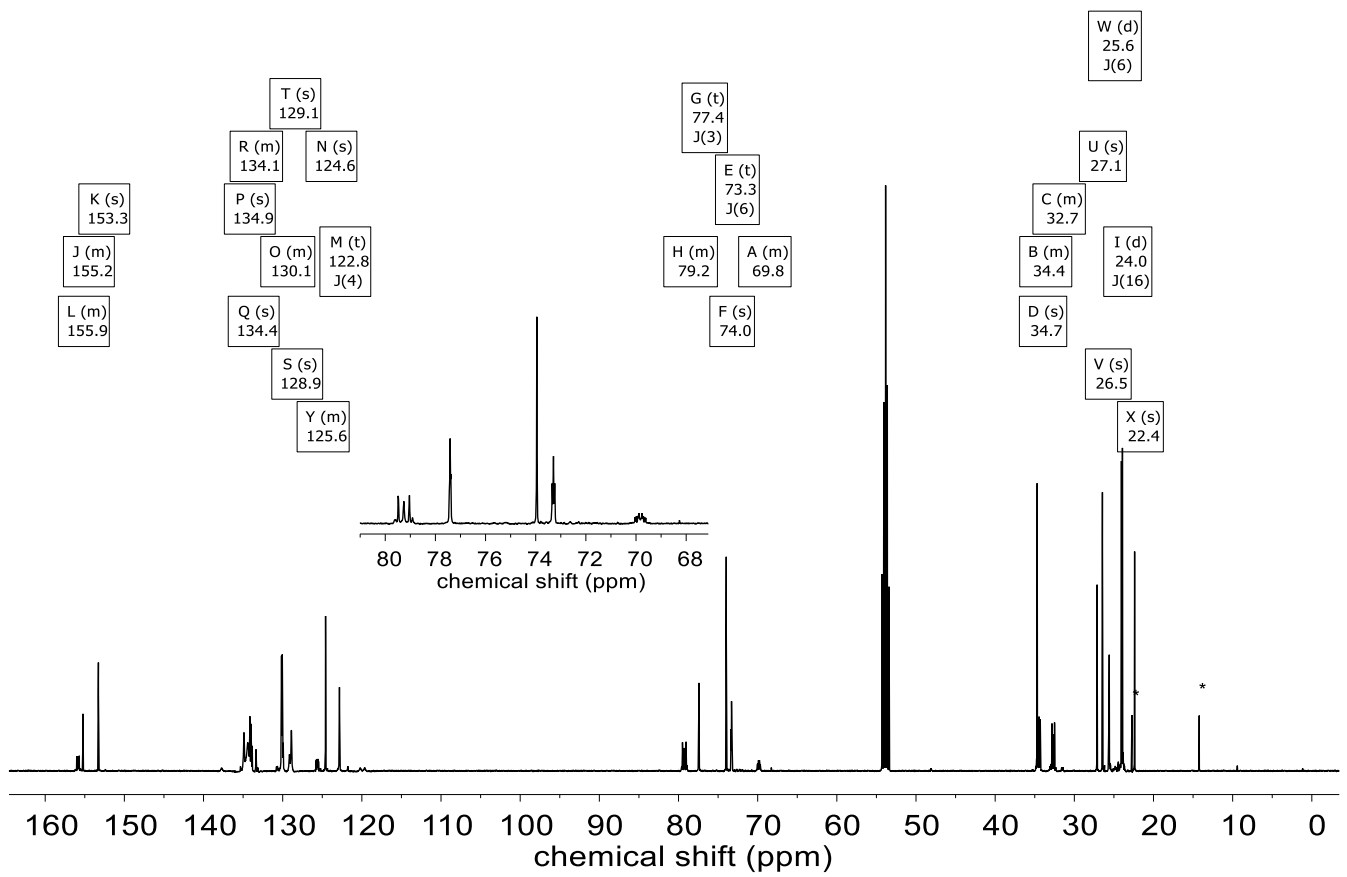

CH-HSQC

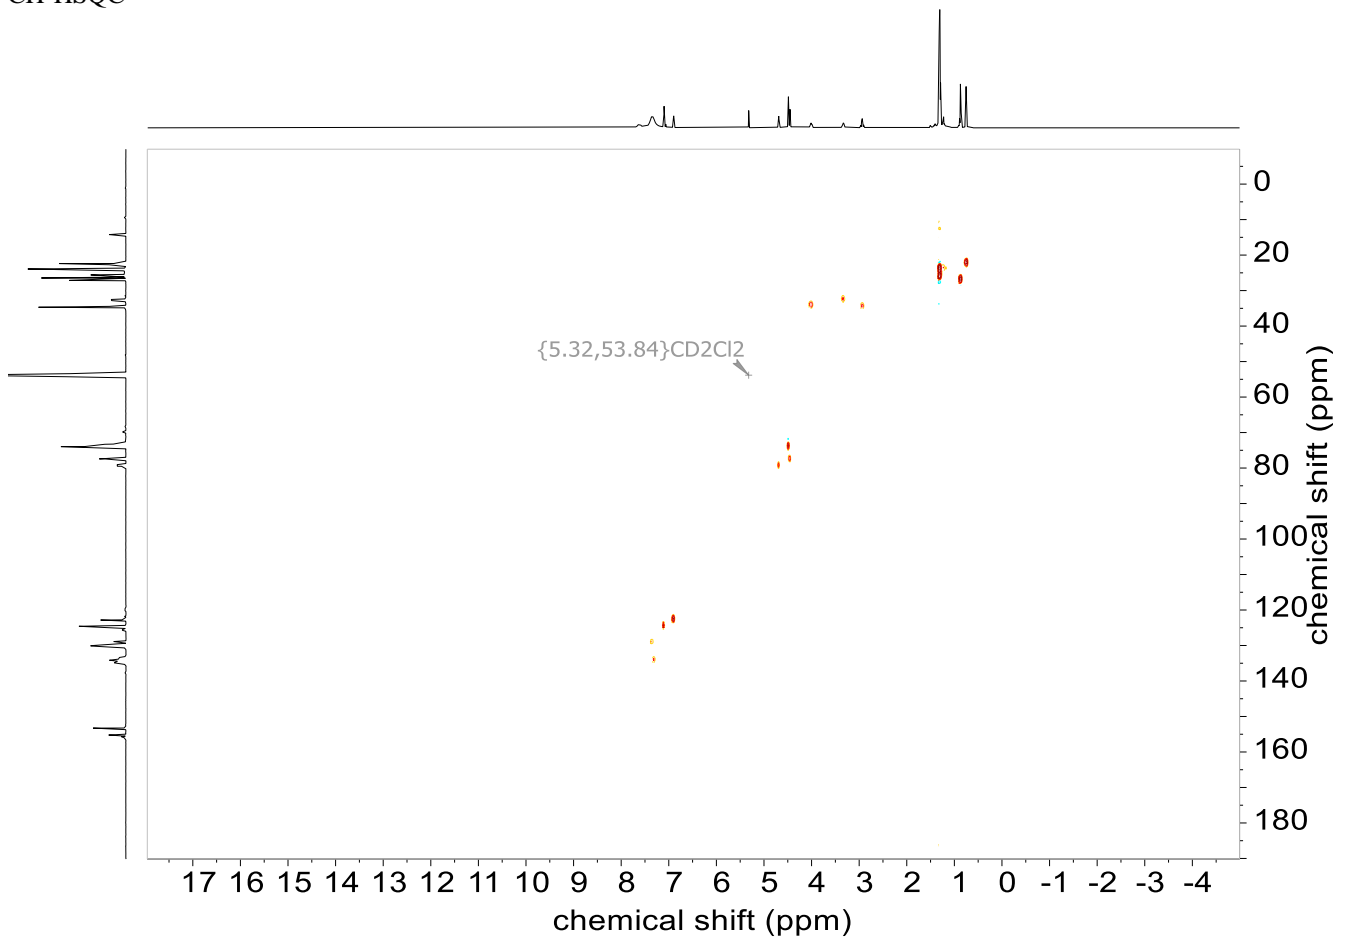

<sup>27</sup>Al-NMR

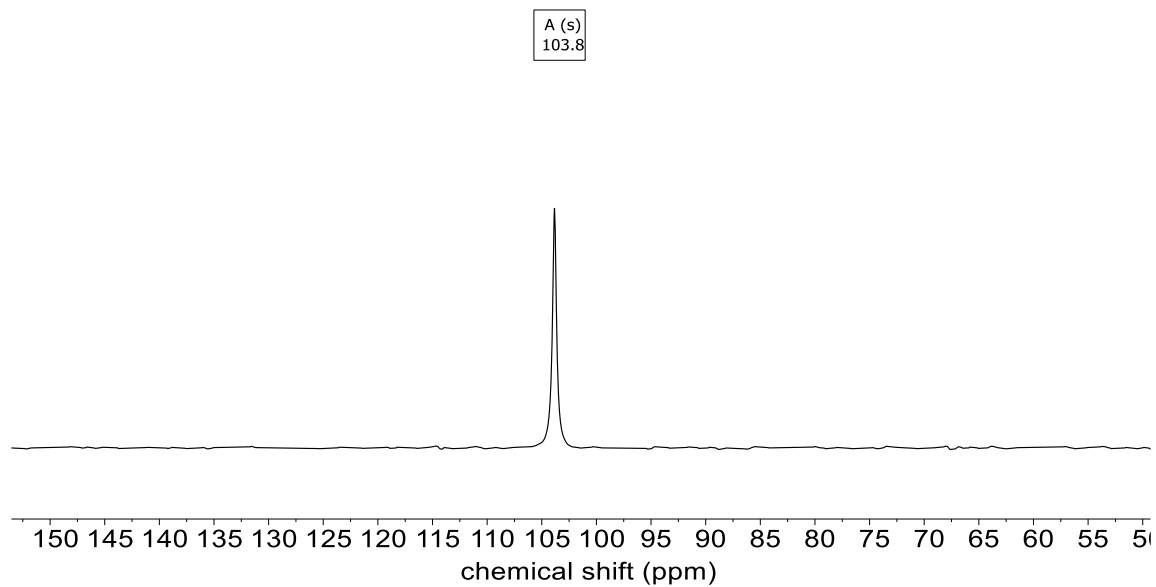

NMR-spectra of **8c**[BF<sub>4</sub>]:  
<sup>31</sup>P-NMR

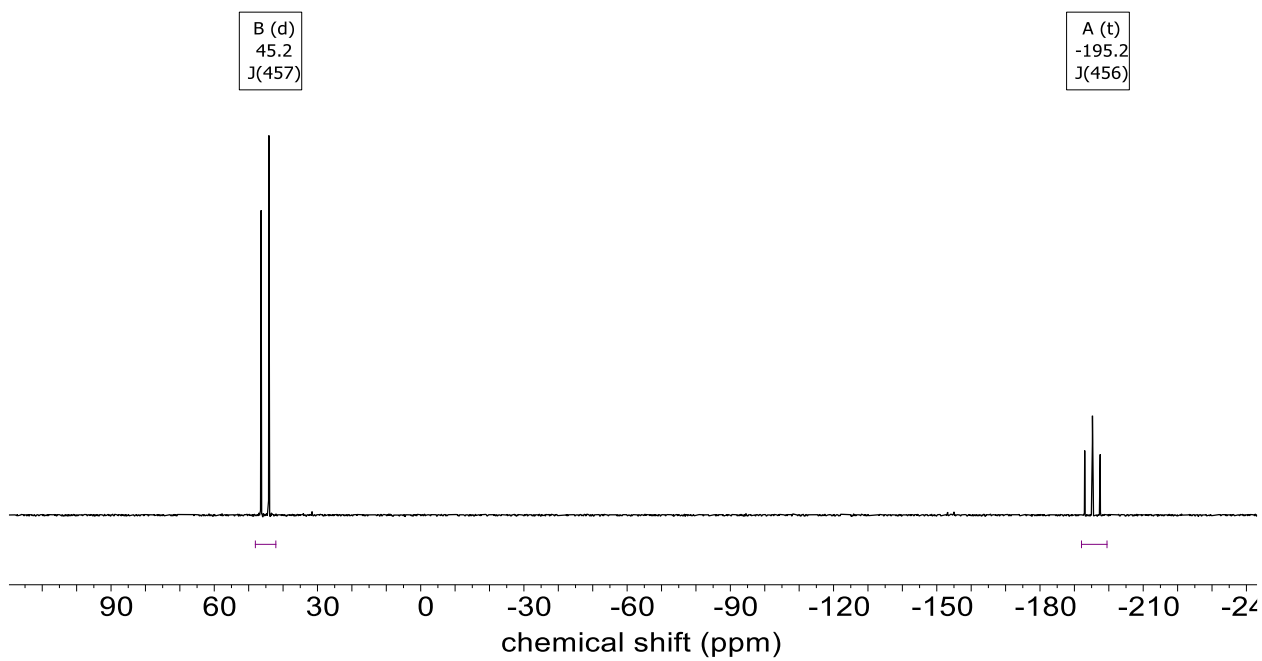

<sup>1</sup>H-NMR

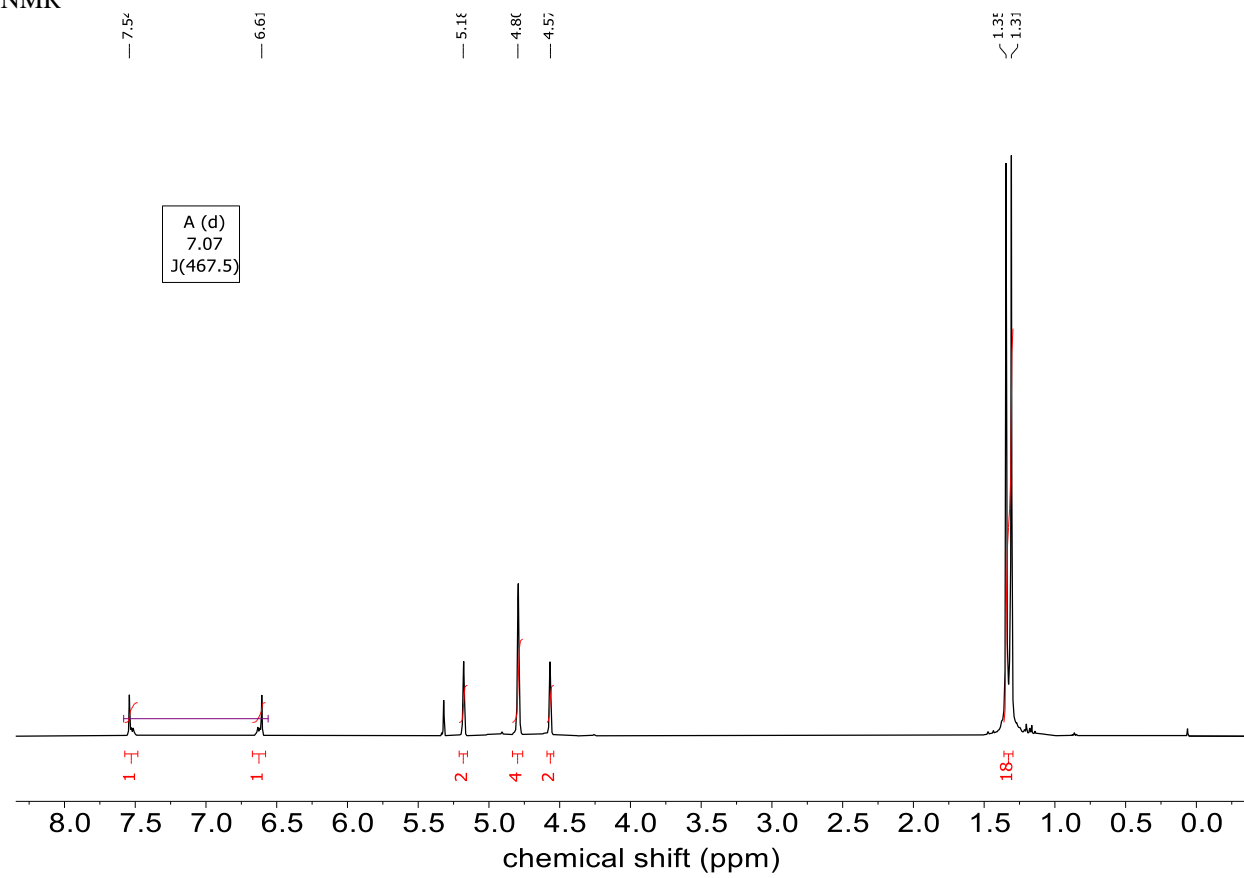

<sup>13</sup>C-NMR

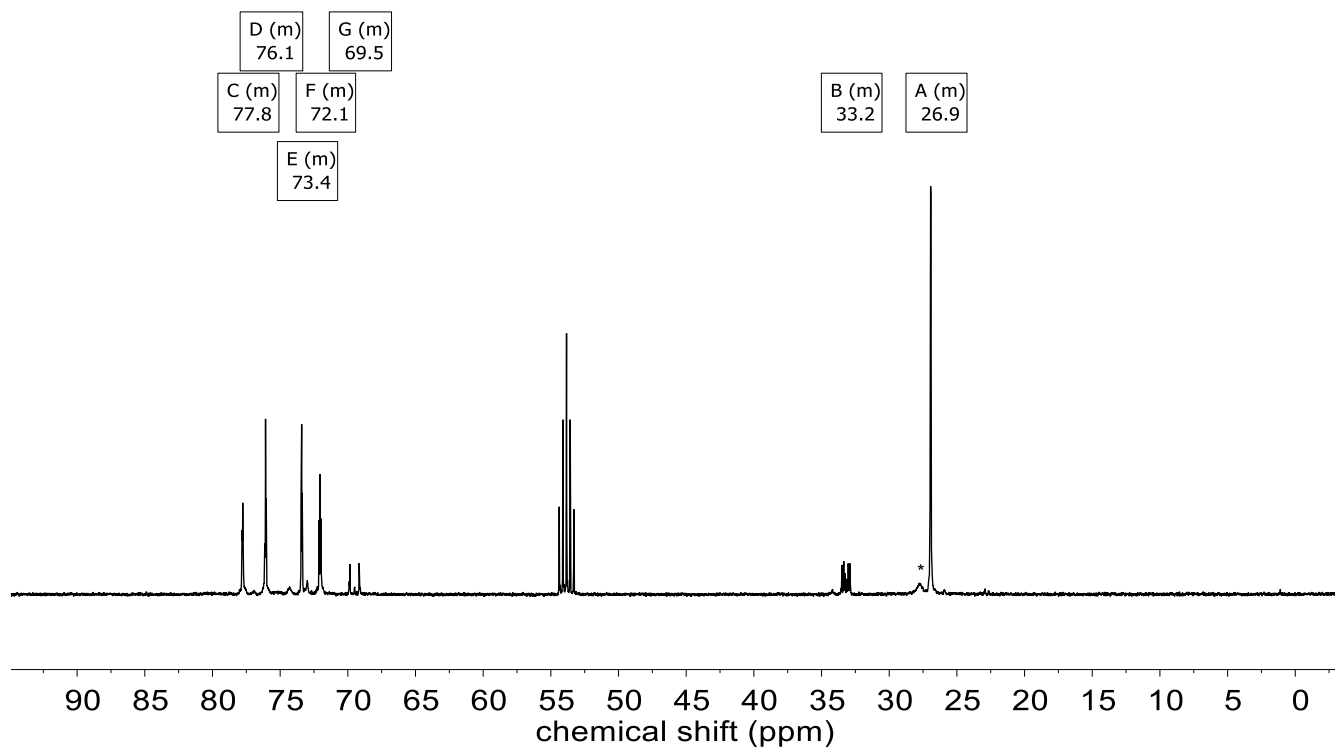

<sup>11</sup>B-NMR

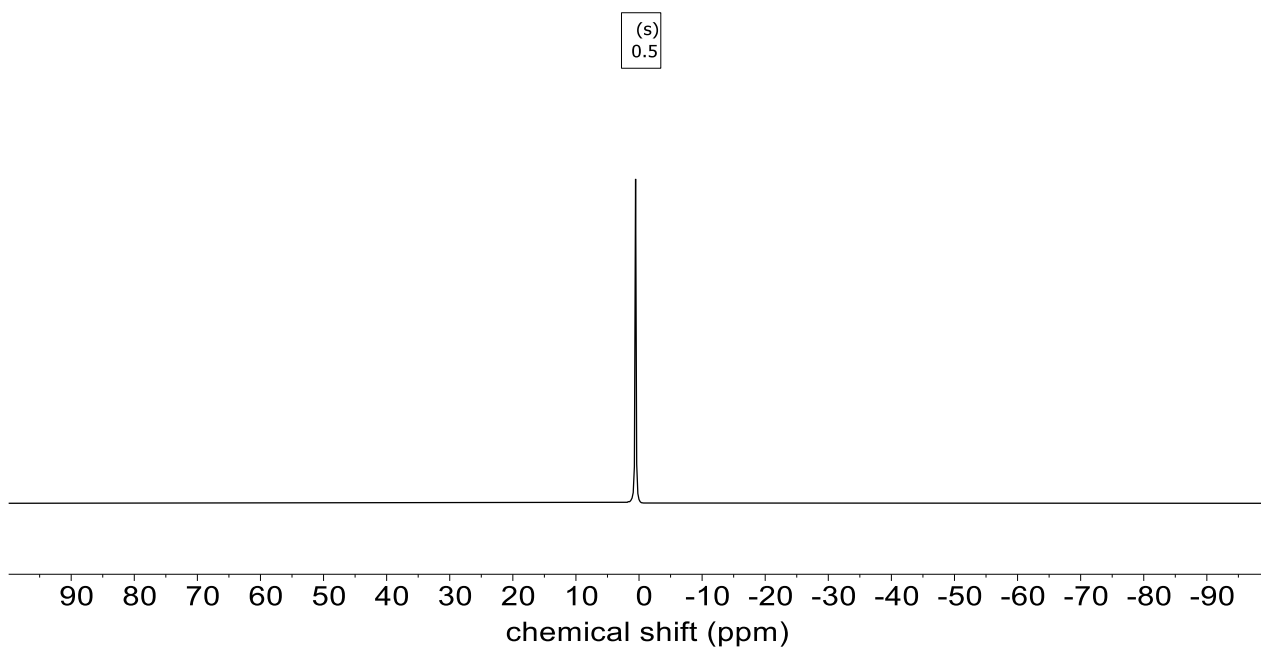

$^{19}\text{F}$ -NMR

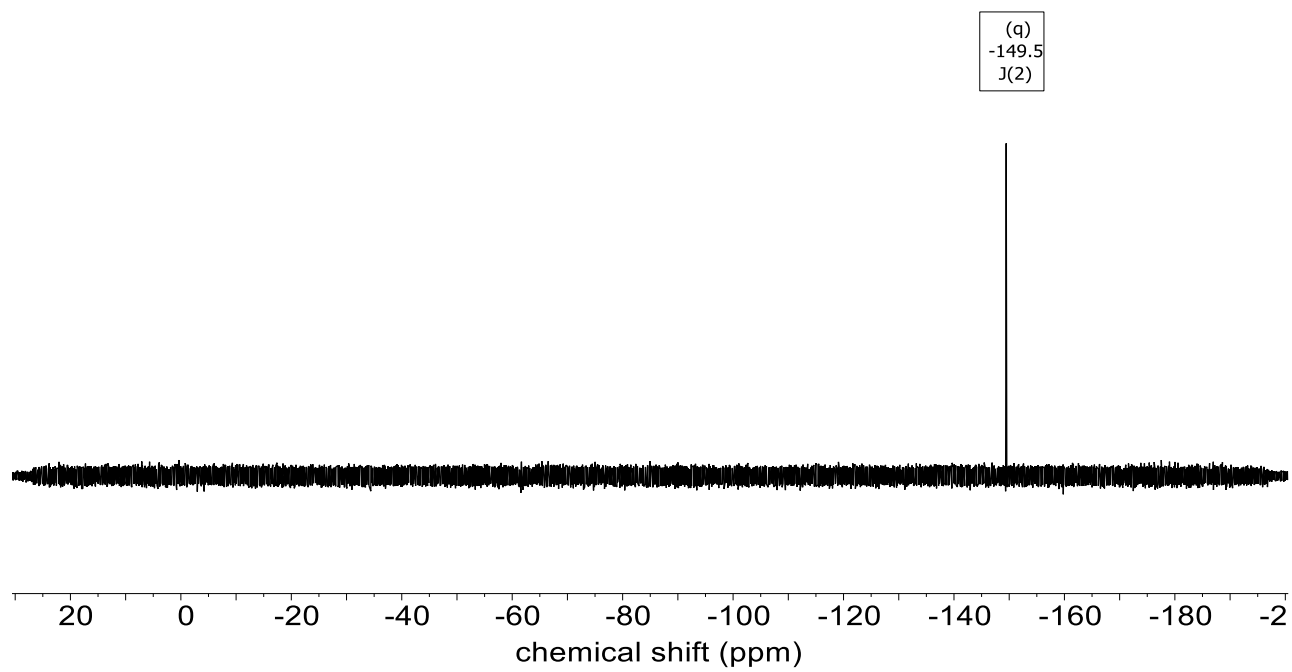



## References

1. C. Moser, A. Orthaber, M. Nieger, F. Belaj and R. Pietschnig, *Dalton Trans.*, 2006, 3879-3885.
2. D. Kargin, Z. Kelemen, K. Krekić, M. Maurer, C. Bruhn, L. Nyulászi and R. Pietschnig, *Dalton Trans.*, 2016, **45**, 2180 - 2189.
3. S. Borucki, Z. Kelemen, M. Maurer, C. Bruhn, L. Nyulaszi and R. Pietschnig, *Chem. Eur. J.*, 2017, **23**, 10438-10450.
4. N. Kano, K. Shibata, N. Tokitoh and R. Okazaki, *Organometallics*, 1999, **18**, 2999-3007.
5. R. K. Harris, E. D. Becker, S. M. Cabral de Menezes, R. Goodfellow and P. Granger, *Pure & Appl. Chem.*, 2001, **73**, 1795-1818.
6. G. M. Sheldrick, *Acta Crystallogr., Sect. C: Struct. Chem.*, 2015, **71**, 3-8.
7. O. V. Dolomanov, L. J. Bourhis, R. J. Gildea, J. A. K. Howard and H. Puschmann, *J. Appl. Cryst.*, 2009, **42**, 339-341.
8. C. F. Macrae, P. R. Edgington, P. McCabe, E. Pidcock, G. P. Shields, R. Taylor, M. Towler and J. van de Streek, *J. Appl. Crystallogr.*, 2006, **39**, 453-457.
9. M. J. Frisch, G. W. Trucks, H. B. Schlegel, G. E. Scuseria, M. A. Robb, J. R. Cheeseman, G. Scalmani, V. Barone, G. A. Petersson, H. Nakatsuji, X. Li, M. Caricato, A. V. Marenich, J. Bloino, B. G. Janesko, R. Gomperts, B. Mennucci, H. P. Hratchian, J. V. Ortiz, A. F. Izmaylov, J. L. Sonnenberg, D. Williams-Young, F. Ding, F. Lipparini, F. Egidi, J. Goings, B. Peng, A. Petrone, T. Henderson, D. Ranasinghe, V. G. Zakrzewski, J. Gao, N. Rega, G. Zheng, W. Liang, M. Hada, M. Ehara, K. Toyota, R. Fukuda, J. Hasegawa, M. Ishida, T. Nakajima, Y. Honda, O. Kitao, H. Nakai, T. Vreven, K. Throssell, J. A. Montgomery Jr., J. E. Peralta, F. Ogliaro, M. Bearpark, J. J. Heyd, E. Brothers, K. N. Kudin, V. N. Staroverov, T. Keith, R. Kobayashi, J. Normand, K. Raghavachari, A. Rendell, J. C. Burant, S. S. Iyengar, J. Tomasi, M. Cossi, J. M. Millam, M. Klene, C. Adamo, R. Cammi, J. W. Ochterski, R. L. Martin, K. Morokuma, O. Farkas, J. B. Foresman and D. J. Fox, *Gaussian 16, Revision C.01*, Gaussian, Inc., Wallingford CT, 2016.
10. S. Weller, S. H. Schlindwein, C. M. Feil, Z. Kelemen, D. Buzsáki, L. Nyulászi, S. Isenberg, R. Pietschnig, M. Nieger and D. Gudat, *Organometallics*, 2019, **38**, 4717-4725.
11. S. Dey, F. Roesler, C. Bruhn, Z. Kelemen and R. Pietschnig, *Inorg. Chem. Frontiers*, 2023, **10**, 3828-3843.
12. T. Lu and F. Chen, *J. Comput. Chem.*, 2012, **33**, 580-592.
13. A. T. B. Gilbert, 2018.
14. E. D. Glendening, J. K. Badenhoop, A. E. Reed, J. E. Carpenter, J. A. Bohmann, C. M. Morales, P. Karafiloglou, C. R. Landis and F. Weinhold, *NBO 7.0*, Theoretical Chemistry Institute University of Wisconsin, Madison WI, 2018.
15. R. F. W. Bader and H. Essén, *J. Chem. Phys.*, 1984, **80**, 1943-1960.
16. E. Espinosa, I. Alkorta, J. Elguero and E. Molins, *J. Chem. Phys.*, 2002, **117**, 5529-5542.
17. J. J. Weigand, N. Burford, A. Decken and A. Schulz, *Eur. J. Inorg. Chem.*, 2007, **2007**, 4868-4872.
18. R. W. Alder, C. Ganter, C. J. Harris and A. G. Orpen, *J. Chem. Soc., Chem. Commun.*, 1992, 1172-1174.
19. S. Lochschmidt and A. Schmidpeter, *Z. Naturforsch. B*, 1985, **40**, 765-773.
20. J. D. Burton, R. M. K. Deng, K. B. Dillon, P. K. Monks and R. J. Olivey, *Heteroat. Chem*, 2005, **16**, 447-452.

## XYZ coordinates

The following lists contain the XYZ coordinates of the investigated systems and their total energies, which were obtained after the geometry optimization at  $\omega$ B97X-D/def2-TZVP.

4

AlCl<sub>3</sub> SCF done: -1623.28276  
Al -0.00015 0.00032 -0.00039  
Cl 1.94769 0.70518 0.00010  
Cl -0.36237 -2.03766 0.00010  
Cl -1.58521 1.33223 0.00010

5

AlCl<sub>4</sub> SCF done: -2083.6785117  
Al -0.00020 -0.00011 0.00003  
Cl -0.81562 0.77414 -1.84390  
Cl 0.15438 1.59739 1.44535  
Cl -1.29954 -1.54427 0.76937  
Cl 1.96094 -0.82718 -0.37085

58

8a<sup>+</sup>[AlCl<sub>4</sub>]<sup>-</sup> SCF done: -4112.91917  
C -4.60825 -0.76407 -1.58943  
C -3.41437 -0.07245 -1.41014  
C -3.28778 1.23558 -1.87419  
C -4.35122 1.83685 -2.52532  
C -5.53772 1.14319 -2.71219  
C -5.66705 -0.15510 -2.24344  
P -2.02665 -0.78317 -0.50899  
C -2.25100 -0.29461 1.22162  
C -1.37531 0.62138 1.78848  
C -1.52751 0.99110 3.11597  
C -2.55334 0.45108 3.87264  
C -3.44212 -0.45312 3.30300  
C -3.29511 -0.82383 1.97921  
C -2.11788 -2.62948 -0.52968  
C -0.71461 -3.22428 -0.73639  
P 0.57129 -1.94567 -0.46575  
C 2.10475 -2.47557 -1.24278  
C 2.43647 -2.03579 -2.52017  
C 3.61139 -2.46819 -3.11171  
C 4.45025 -3.34011 -2.43554  
C 4.12176 -3.77875 -1.16103  
C 2.95388 -3.34378 -0.55975  
P -0.19261 -0.19280 -1.37777  
C 0.88015 -1.84489 1.30880  
C 1.78940 -0.88327 1.74494  
C 1.98711 -0.68840 3.09984  
C 1.27363 -1.43882 4.02255  
C 0.36262 -2.39093 3.59257  
C 0.16606 -2.59715 2.23714  
Cl 2.89370 1.44767 -1.07173  
Al 1.88249 3.13797 -0.14910

|    |          |          |          |
|----|----------|----------|----------|
| Cl | -0.09250 | 3.39382  | -1.00144 |
| Cl | 3.04164  | 4.90339  | -0.41059 |
| Cl | 1.63773  | 2.67829  | 1.95627  |
| H  | -2.55516 | -2.96542 | 0.40962  |
| H  | -2.77948 | -2.92978 | -1.34058 |
| H  | -0.54344 | -4.10249 | -0.11408 |
| H  | -0.57563 | -3.52362 | -1.77459 |
| H  | 2.31767  | -0.25985 | 1.03157  |
| H  | 2.67771  | 0.07678  | 3.42684  |
| H  | 1.41953  | -1.27206 | 5.08216  |
| H  | -0.20336 | -2.96890 | 4.31137  |
| H  | -0.55907 | -3.33515 | 1.92001  |
| H  | 1.79117  | -1.34178 | -3.04348 |
| H  | 3.87728  | -2.10977 | -4.09717 |
| H  | 5.37171  | -3.66977 | -2.89817 |
| H  | 4.78326  | -4.44916 | -0.62822 |
| H  | 2.71387  | -3.66290 | 0.44698  |
| H  | -0.56643 | 1.04693  | 1.20737  |
| H  | -0.83228 | 1.70260  | 3.54169  |
| H  | -2.66949 | 0.73796  | 4.91015  |
| H  | -4.25209 | -0.86481 | 3.89138  |
| H  | -4.00270 | -1.51889 | 1.54056  |
| H  | -2.36724 | 1.79058  | -1.72457 |
| H  | -4.24841 | 2.85180  | -2.88567 |
| H  | -6.36589 | 1.61717  | -3.22320 |
| H  | -6.59365 | -0.69590 | -2.38559 |
| H  | -4.72566 | -1.77591 | -1.22110 |

99

isomer-1 of 3 SCF done: -4305.004198

|    |          |          |          |
|----|----------|----------|----------|
| C  | 3.92963  | -0.20182 | 0.95862  |
| C  | 3.16260  | -0.62937 | -0.14163 |
| C  | 3.64602  | -1.69434 | -0.93973 |
| C  | 4.86523  | -2.27871 | -0.61640 |
| C  | 5.63789  | -1.84918 | 0.44748  |
| C  | 5.14990  | -0.80803 | 1.21809  |
| P  | 1.56565  | 0.09298  | -0.71000 |
| C  | 1.66355  | 1.90017  | -0.82561 |
| C  | 1.61928  | 2.97510  | 0.11684  |
| C  | 1.64050  | 4.19727  | -0.59683 |
| C  | 1.68267  | 3.90212  | -1.98412 |
| C  | 1.69542  | 2.49582  | -2.12858 |
| Fe | 0.00010  | 3.07262  | -1.11719 |
| C  | -1.69862 | 2.49924  | -2.12474 |
| C  | -1.66364 | 1.90133  | -0.82293 |
| C  | -1.61562 | 2.97453  | 0.12130  |
| C  | -1.63768 | 4.19796  | -0.59012 |
| C  | -1.68403 | 3.90529  | -1.97781 |
| P  | -1.56595 | 0.09393  | -0.71016 |
| P  | -0.00030 | -0.54776 | 0.65279  |
| Cl | -0.00083 | 0.60067  | 2.42572  |
| C  | 2.86883  | -2.28451 | -2.10869 |
| C  | 1.95232  | -3.40626 | -1.61357 |
| C  | 6.96630  | -2.50190 | 0.75939  |

|   |          |          |          |
|---|----------|----------|----------|
| C | 6.95350  | -3.16678 | 2.13702  |
| C | 3.49456  | 0.90456  | 1.89356  |
| C | 4.35735  | 2.15334  | 1.70779  |
| C | -3.16264 | -0.62923 | -0.14191 |
| C | -3.64516 | -1.69480 | -0.93975 |
| C | -4.86419 | -2.27969 | -0.61666 |
| C | -5.63751 | -1.85013 | 0.44672  |
| C | -5.15038 | -0.80841 | 1.21711  |
| C | -3.93032 | -0.20168 | 0.95790  |
| C | -2.86719 | -2.28509 | -2.10812 |
| C | -1.95071 | -3.40653 | -1.61225 |
| C | -3.49624 | 0.90552  | 1.89233  |
| C | -3.48091 | 0.45792  | 3.35445  |
| C | -6.96573 | -2.50339 | 0.75834  |
| C | -6.95322 | -3.16764 | 2.13627  |
| C | -4.35837 | 2.15435  | 1.70382  |
| C | -8.12140 | -1.50867 | 0.63677  |
| C | -3.74644 | -2.77552 | -3.25789 |
| C | 3.74882  | -2.77447 | -3.25809 |
| C | 8.12152  | -1.50654 | 0.63878  |
| C | 3.47713  | 0.45514  | 3.35512  |
| H | -2.47215 | 1.15818  | 1.64193  |
| H | -2.22691 | -1.50107 | -2.51034 |
| H | 1.70460  | 1.94734  | -3.05685 |
| H | -5.23122 | -3.10081 | -1.21943 |
| H | 1.59383  | 5.18162  | -0.15941 |
| H | -4.48591 | 0.25233  | 3.72876  |
| H | -3.04925 | 1.24269  | 3.97903  |
| H | -2.87855 | -0.44220 | 3.48166  |
| H | -1.58880 | 5.18149  | -0.15110 |
| H | -1.71093 | 1.95246  | -3.05398 |
| H | -7.12155 | -3.28762 | 0.01186  |
| H | 1.54138  | 2.88088  | 1.18561  |
| H | -1.68301 | 4.62690  | -2.77859 |
| H | 1.68002  | 4.62230  | -2.78618 |
| H | -5.73548 | -0.45749 | 2.05932  |
| H | -5.39722 | 1.95481  | 1.97701  |
| H | -4.33937 | 2.49301  | 0.66725  |
| H | -3.99633 | 2.96932  | 2.33491  |
| H | -1.53475 | 2.87819  | 1.18968  |
| H | -6.14091 | -3.89143 | 2.21651  |
| H | -7.89613 | -3.68647 | 2.32086  |
| H | -6.81963 | -2.42598 | 2.92708  |
| H | -1.25631 | -3.04484 | -0.85202 |
| H | -1.36572 | -3.81887 | -2.43713 |
| H | -2.53831 | -4.21544 | -1.17064 |
| H | -4.29694 | -3.68380 | -3.00382 |
| H | -3.11872 | -3.01371 | -4.11863 |
| H | -4.46750 | -2.01546 | -3.56318 |
| H | -8.02904 | -0.70932 | 1.37559  |
| H | -9.07752 | -2.00874 | 0.80425  |
| H | -8.14235 | -1.04911 | -0.35247 |
| H | 5.23295  | -3.09937 | -1.21937 |
| H | 5.73447  | -0.45716 | 2.06069  |

|   |         |          |          |
|---|---------|----------|----------|
| H | 2.22860 | -1.50054 | -2.51107 |
| H | 7.12285 | -3.28572 | 0.01263  |
| H | 2.47087 | 1.15788  | 1.64200  |
| H | 7.89659 | -3.68522 | 2.32180  |
| H | 6.81919 | -2.42553 | 2.92809  |
| H | 6.14152 | -3.89100 | 2.21658  |
| H | 9.07782 | -2.00622 | 0.80642  |
| H | 8.14265 | -1.04651 | -0.35024 |
| H | 8.02846 | -0.70759 | 1.37794  |
| H | 3.12162 | -3.01254 | -4.11924 |
| H | 4.46990 | -2.01419 | -3.56277 |
| H | 4.29934 | -3.68272 | -3.00398 |
| H | 1.36803 | -3.81869 | -2.43890 |
| H | 2.53984 | -4.21503 | -1.17162 |
| H | 1.25729 | -3.04482 | -0.85380 |
| H | 3.04509 | 1.23929  | 3.98019  |
| H | 2.87416 | -0.44484 | 3.48040  |
| H | 4.48158 | 0.24850  | 3.73031  |
| H | 3.99475 | 2.96761  | 2.33946  |
| H | 5.39578 | 1.95320  | 1.98212  |
| H | 4.33983 | 2.49333  | 0.67162  |

53

**8a<sup>+</sup>** SCF done: -2029.1478817

|   |          |          |          |
|---|----------|----------|----------|
| C | -4.11515 | -0.89198 | -0.44790 |
| C | -2.92389 | -1.47485 | -0.02745 |
| C | -2.87681 | -2.83950 | 0.25857  |
| C | -4.01972 | -3.60803 | 0.14188  |
| C | -5.20962 | -3.02283 | -0.27093 |
| C | -5.25573 | -1.67074 | -0.56847 |
| P | -1.40965 | -0.51377 | 0.11777  |
| C | -1.83996 | 1.23511  | -0.05029 |
| C | -1.38180 | 1.96601  | -1.13916 |
| C | -1.67671 | 3.31668  | -1.23954 |
| C | -2.43067 | 3.93759  | -0.25749 |
| C | -2.90078 | 3.20853  | 0.82731  |
| C | -2.60780 | 1.86111  | 0.93254  |
| C | -0.73516 | -0.69524 | 1.83166  |
| C | 0.78001  | -0.92925 | 1.81370  |
| P | 1.48230  | -0.49209 | 0.18384  |
| C | 3.08413  | -1.28367 | -0.00134 |
| C | 3.15374  | -2.60620 | -0.43617 |
| C | 4.38266  | -3.23677 | -0.52351 |
| C | 5.53979  | -2.55444 | -0.17698 |
| C | 5.47248  | -1.23904 | 0.25713  |
| C | 4.24776  | -0.59925 | 0.34501  |
| P | 0.06918  | -1.23627 | -1.22162 |
| C | 1.73004  | 1.29428  | 0.13002  |
| C | 2.21498  | 1.84850  | -1.05459 |
| C | 2.32872  | 3.21989  | -1.18236 |
| C | 1.94435  | 4.04963  | -0.13677 |
| C | 1.45721  | 3.50508  | 1.03922  |
| C | 1.35347  | 2.12907  | 1.17629  |

|   |          |          |          |
|---|----------|----------|----------|
| H | -0.98926 | 0.21012  | 2.38099  |
| H | -1.25389 | -1.52659 | 2.30662  |
| H | 1.29190  | -0.39820 | 2.61617  |
| H | 1.01058  | -1.98858 | 1.92599  |
| H | 2.49671  | 1.20669  | -1.88126 |
| H | 2.71292  | 3.64417  | -2.10056 |
| H | 2.02705  | 5.12359  | -0.24128 |
| H | 1.15753  | 4.14927  | 1.85504  |
| H | 0.96938  | 1.72467  | 2.10330  |
| H | 2.25169  | -3.13952 | -0.71097 |
| H | 4.43725  | -4.26107 | -0.86728 |
| H | 6.49943  | -3.04953 | -0.24946 |
| H | 6.37591  | -0.70728 | 0.52440  |
| H | 4.20183  | 0.43088  | 0.67445  |
| H | -0.78143 | 1.48082  | -1.89835 |
| H | -1.31288 | 3.88288  | -2.08659 |
| H | -2.65860 | 4.99269  | -0.33631 |
| H | -3.49800 | 3.69096  | 1.58978  |
| H | -2.99033 | 1.29941  | 1.77723  |
| H | -1.94439 | -3.30450 | 0.55709  |
| H | -3.98277 | -4.66572 | 0.36618  |
| H | -6.10253 | -3.62697 | -0.36523 |
| H | -6.18110 | -1.21732 | -0.89784 |
| H | -4.15777 | 0.16290  | -0.68417 |

99

isomer-2 of 3 SCF done: -4305.0049984

|    |           |           |           |
|----|-----------|-----------|-----------|
| C  | 0.000000  | 0.000000  | 0.000000  |
| C  | 0.000000  | 0.000000  | 1.414331  |
| C  | 1.235097  | 0.000000  | 2.092265  |
| C  | 2.414282  | -0.022123 | 1.361228  |
| C  | 2.430081  | -0.044046 | -0.022518 |
| C  | 1.212710  | -0.027413 | -0.678401 |
| P  | -1.687651 | -0.064102 | 2.169535  |
| C  | -1.909010 | 1.447732  | 3.162452  |
| C  | -2.919470 | 2.382804  | 2.768953  |
| C  | -2.962516 | 3.433488  | 3.714263  |
| C  | -1.985802 | 3.165195  | 4.707374  |
| C  | -1.340194 | 1.949336  | 4.376082  |
| Fe | -3.345277 | 1.621981  | 4.628677  |
| C  | -3.551363 | 0.280703  | 6.161627  |
| C  | -4.146988 | -0.244369 | 4.971011  |
| C  | -5.170069 | 0.680145  | 4.585227  |
| C  | -5.204078 | 1.740178  | 5.520383  |
| C  | -4.203345 | 1.492625  | 6.494814  |
| P  | -3.817462 | -1.677586 | 3.894979  |
| P  | -1.593053 | -1.586866 | 3.793973  |
| Cl | -1.311151 | -3.252000 | 2.585407  |
| C  | 1.376191  | 0.024231  | 3.601484  |
| C  | 2.071648  | 1.300639  | 4.077211  |
| C  | 3.731294  | -0.080297 | -0.792935 |
| C  | 4.527904  | -1.349693 | -0.486425 |
| C  | -1.274634 | -0.010328 | -0.835746 |
| C  | -1.688989 | -1.449048 | -1.150915 |

|   |           |           |           |
|---|-----------|-----------|-----------|
| C | -4.236151 | -3.205893 | 4.849811  |
| C | -3.615598 | -3.669806 | 6.026546  |
| C | -4.010811 | -4.882308 | 6.573399  |
| C | -5.001220 | -5.665283 | 6.006425  |
| C | -5.615297 | -5.193025 | 4.860830  |
| C | -5.265177 | -3.984392 | 4.270733  |
| C | -2.519457 | -2.922931 | 6.760670  |
| C | -1.214114 | -3.719400 | 6.797526  |
| C | -5.997352 | -3.585551 | 2.994748  |
| C | -5.292522 | -4.178579 | 1.773063  |
| C | -5.403562 | -6.988614 | 6.618746  |
| C | -4.237255 | -7.978277 | 6.629631  |
| C | -7.481920 | -3.950583 | 2.998055  |
| C | -5.982375 | -6.803640 | 8.022579  |
| C | -2.966268 | -2.512792 | 8.164733  |
| C | 2.079695  | -1.227812 | 4.127872  |
| C | -1.177833 | 0.821704  | -2.114647 |
| C | 4.570502  | 1.172467  | -0.535598 |
| H | -2.305354 | -2.013877 | 6.209812  |
| H | -5.942643 | -2.501399 | 2.902299  |
| H | -3.553066 | 2.275190  | 1.903045  |
| H | -6.396979 | -5.792980 | 4.411717  |
| H | -1.787397 | 3.765677  | 5.580631  |
| H | -1.321067 | -4.639118 | 7.376623  |
| H | -0.421591 | -3.124437 | 7.256503  |
| H | -0.893850 | -3.990978 | 5.790377  |
| H | -3.958937 | 2.130122  | 7.329315  |
| H | -5.788291 | 0.581706  | 3.707199  |
| H | -6.191189 | -7.409059 | 5.986753  |
| H | -0.573376 | 1.480026  | 4.966959  |
| H | -5.856453 | 2.597584  | 5.484839  |
| H | -3.635642 | 4.275286  | 3.697689  |
| H | -3.521047 | -5.227621 | 7.476843  |
| H | -3.143436 | -3.384522 | 8.797955  |
| H | -3.888987 | -1.931573 | 8.127834  |
| H | -2.196219 | -1.905225 | 8.646555  |
| H | -2.726654 | -0.143318 | 6.706991  |
| H | -3.835697 | -8.123745 | 5.625809  |
| H | -4.559816 | -8.947518 | 7.015482  |
| H | -3.425026 | -7.619357 | 7.265888  |
| H | -4.260232 | -3.831041 | 1.707644  |
| H | -5.809093 | -3.891272 | 0.854604  |
| H | -5.278892 | -5.269886 | 1.831217  |
| H | -7.646364 | -5.026166 | 2.906596  |
| H | -7.973701 | -3.479358 | 2.144948  |
| H | -7.976420 | -3.607754 | 3.908446  |
| H | -5.230699 | -6.401417 | 8.705725  |
| H | -6.323131 | -7.759130 | 8.426662  |
| H | -6.827543 | -6.113837 | 8.011629  |
| H | 1.211787  | -0.036854 | -1.761266 |
| H | 3.356539  | -0.025675 | 1.897384  |
| H | -2.071332 | 0.429372  | -0.236726 |
| H | 3.475016  | -0.096566 | -1.856232 |
| H | 0.381082  | 0.017187  | 4.031962  |

|   |           |           |           |
|---|-----------|-----------|-----------|
| H | 5.432691  | -1.391846 | -1.096299 |
| H | 4.830961  | -1.377958 | 0.562728  |
| H | 3.935594  | -2.243556 | -0.687042 |
| H | 5.476955  | 1.159379  | -1.144307 |
| H | 4.009419  | 2.077320  | -0.773678 |
| H | 4.873222  | 1.232146  | 0.512393  |
| H | -2.168875 | 0.915914  | -2.562598 |
| H | -0.798825 | 1.824748  | -1.911860 |
| H | -0.531929 | 0.359631  | -2.864031 |
| H | -2.605523 | -1.463373 | -1.744816 |
| H | -0.905415 | -1.957656 | -1.718238 |
| H | -1.865729 | -2.016600 | -0.235850 |
| H | 2.091850  | -1.223086 | 5.219918  |
| H | 1.565378  | -2.132130 | 3.798667  |
| H | 3.113878  | -1.283194 | 3.781367  |
| H | 2.090642  | 1.339035  | 5.169192  |
| H | 3.104851  | 1.346624  | 3.726978  |
| H | 1.553306  | 2.188424  | 3.711495  |

52

dppe SCF done: -1687.957646

|   |          |          |          |
|---|----------|----------|----------|
| C | 1.46929  | 1.07211  | 1.81301  |
| C | 1.64884  | 1.03518  | 0.43171  |
| C | 1.82496  | 2.23844  | -0.24653 |
| C | 1.83580  | 3.44532  | 0.43441  |
| C | 1.64810  | 3.46824  | 1.80704  |
| C | 1.46171  | 2.27826  | 2.49541  |
| P | 1.63747  | -0.48723 | -0.58335 |
| C | 3.33752  | -1.13988 | -0.35366 |
| C | 3.70148  | -2.23735 | -1.13451 |
| C | 4.95709  | -2.80993 | -1.01638 |
| C | 5.88119  | -2.27852 | -0.12859 |
| C | 5.53811  | -1.17685 | 0.63882  |
| C | 4.27461  | -0.61367 | 0.53101  |
| C | 0.74021  | -1.70459 | 0.49169  |
| C | -0.73146 | -1.39367 | 0.76951  |
| P | -1.75561 | -1.09261 | -0.75358 |
| C | -1.61325 | 0.72729  | -0.94490 |
| C | -1.32360 | 1.22646  | -2.21029 |
| C | -1.19878 | 2.59222  | -2.42451 |
| C | -1.36172 | 3.47535  | -1.37053 |
| C | -1.64780 | 2.99101  | -0.10148 |
| C | -1.77204 | 1.62938  | 0.10710  |
| C | -3.43868 | -1.27951 | -0.03748 |
| C | -4.42245 | -0.29694 | -0.11661 |
| C | -5.70473 | -0.53386 | 0.35843  |
| C | -6.02944 | -1.75670 | 0.92126  |
| C | -5.06398 | -2.75055 | 0.99299  |
| C | -3.78835 | -2.51599 | 0.50948  |
| H | -0.82413 | -0.54796 | 1.45300  |
| H | -1.17654 | -2.25138 | 1.27714  |
| H | 1.27500  | -1.84413 | 1.43500  |
| H | 0.81838  | -2.65086 | -0.05038 |
| H | 1.93685  | 2.22816  | -1.32435 |



|   |          |          |          |
|---|----------|----------|----------|
| H | 1.97307  | 4.37022  | -0.11148 |
| H | 1.64368  | 4.41052  | 2.34060  |
| H | 1.31461  | 2.28892  | 3.56831  |
| H | 1.33684  | 0.15249  | 2.36933  |
| H | 2.99407  | -2.64347 | -1.84968 |
| H | 5.21895  | -3.66481 | -1.62735 |
| H | 6.86707  | -2.71754 | -0.04137 |
| H | 6.25648  | -0.75164 | 1.32884  |
| H | 4.02166  | 0.24585  | 1.13870  |
| H | -1.18200 | 0.53526  | -3.03234 |
| H | -0.97112 | 2.96343  | -3.41589 |
| H | -1.25993 | 4.54113  | -1.53338 |
| H | -1.76493 | 3.67606  | 0.72849  |
| H | -2.00399 | 1.26729  | 1.10138  |
| H | -3.05773 | -3.31652 | 0.54994  |
| H | -5.30754 | -3.71588 | 1.41916  |
| H | -7.02905 | -1.93873 | 1.29498  |
| H | -6.45197 | 0.24691  | 0.28800  |
| H | -4.19139 | 0.66684  | -0.55088 |

65

dppf SCF done: -3259.006097

|    |          |          |          |
|----|----------|----------|----------|
| C  | -2.85100 | 0.72068  | 2.09186  |
| C  | -2.10764 | 1.18842  | 1.00963  |
| C  | -1.13673 | 2.15900  | 1.23564  |
| C  | -0.88658 | 2.62970  | 2.51697  |
| C  | -1.61567 | 2.13995  | 3.58793  |
| C  | -2.60407 | 1.18819  | 3.37160  |
| P  | -2.29354 | 0.58190  | -0.71122 |
| C  | -4.11012 | 0.34561  | -0.81532 |
| C  | -4.94968 | 1.40679  | -0.47419 |
| C  | -6.32184 | 1.30420  | -0.62574 |
| C  | -6.88223 | 0.14147  | -1.13579 |
| C  | -6.05804 | -0.91385 | -1.49040 |
| C  | -4.68313 | -0.81363 | -1.33133 |
| C  | -1.72907 | -1.14001 | -0.59908 |
| C  | -0.90368 | -1.74913 | -1.59207 |
| C  | -0.74171 | -3.11763 | -1.27040 |
| C  | -1.46831 | -3.37280 | -0.07716 |
| C  | -2.07110 | -2.16134 | 0.33913  |
| Fe | -0.03563 | -1.93894 | 0.26469  |
| C  | 1.07085  | -0.47266 | 1.20655  |
| C  | 1.86584  | -1.14769 | 0.23706  |
| C  | 1.89078  | -2.52780 | 0.60382  |
| C  | 1.12474  | -2.68995 | 1.78592  |
| C  | 0.60792  | -1.41885 | 2.15173  |
| P  | 2.73041  | -0.47186 | -1.20666 |
| C  | 2.10023  | 1.25472  | -1.21103 |
| C  | 1.11870  | 1.58769  | -2.13888 |
| C  | 0.60267  | 2.87399  | -2.20054 |
| C  | 1.07523  | 3.85038  | -1.33947 |
| C  | 2.05523  | 3.53184  | -0.40831 |
| C  | 2.56118  | 2.24423  | -0.34299 |
| C  | 4.41484  | -0.21904 | -0.52312 |

|   |          |          |          |
|---|----------|----------|----------|
| C | 4.76138  | -0.43578 | 0.80729  |
| C | 6.06296  | -0.22501 | 1.24057  |
| C | 7.03299  | 0.21088  | 0.35239  |
| C | 6.69905  | 0.42788  | -0.97708 |
| C | 5.40327  | 0.20492  | -1.41085 |
| H | -0.46250 | -1.23978 | -2.43384 |
| H | -1.51968 | -4.31585 | 0.44313  |
| H | -0.04857 | -1.20701 | 2.98049  |
| H | 2.39520  | -3.31134 | 0.06055  |
| H | -2.67564 | -2.02908 | 1.22102  |
| H | 0.93432  | -3.62283 | 2.29183  |
| H | -0.14438 | -3.82988 | -1.81607 |
| H | 0.83748  | 0.57732  | 1.20216  |
| H | 0.75343  | 0.83365  | -2.82536 |
| H | -0.17124 | 3.10777  | -2.91990 |
| H | 0.68066  | 4.85746  | -1.39043 |
| H | 2.42896  | 4.29104  | 0.26767  |
| H | 3.32954  | 2.00785  | 0.38275  |
| H | 5.15249  | 0.36478  | -2.45386 |
| H | 7.45224  | 0.76332  | -1.67904 |
| H | 8.04752  | 0.37678  | 0.69238  |
| H | 6.31687  | -0.39958 | 2.27884  |
| H | 4.01073  | -0.76899 | 1.51289  |
| H | -4.52601 | 2.32120  | -0.07448 |
| H | -6.95638 | 2.13608  | -0.34615 |
| H | -7.95516 | 0.06059  | -1.25601 |
| H | -6.48470 | -1.82548 | -1.89021 |
| H | -4.05442 | -1.65124 | -1.60614 |
| H | -3.63977 | -0.00384 | 1.93004  |
| H | -3.18699 | 0.81348  | 4.20392  |
| H | -1.42432 | 2.50480  | 4.58936  |
| H | -0.12089 | 3.37931  | 2.67358  |
| H | -0.55927 | 2.53915  | 0.40104  |

49

|          |                        |          |          |
|----------|------------------------|----------|----------|
| <b>7</b> | SCF done: -2649.317856 |          |          |
| C        | 1.32738                | -0.60780 | 0.22210  |
| C        | 1.52852                | -1.85727 | -0.43615 |
| C        | 1.13289                | -2.89874 | 0.43876  |
| C        | 0.67757                | -2.30728 | 1.64590  |
| C        | 0.79127                | -0.90161 | 1.51262  |
| Fe       | -0.45398               | -1.64851 | 0.05288  |
| C        | -1.54998               | -1.43570 | -1.66541 |
| C        | -1.76199               | -2.72300 | -1.11297 |
| C        | -2.29404               | -2.55394 | 0.18948  |
| C        | -2.41994               | -1.16299 | 0.43440  |
| C        | -1.96882               | -0.45264 | -0.71637 |
| P        | -1.88337               | 1.31621  | -1.15031 |
| C        | -2.47661               | 2.28578  | 0.34107  |
| C        | -1.54653               | 2.05172  | 1.53392  |
| P        | 1.71918                | 1.06731  | -0.35199 |
| C        | 3.58325                | 1.14342  | -0.13431 |
| C        | 4.33378                | -0.01508 | -0.78719 |
| C        | -2.36943               | 3.75580  | -0.08735 |

|   |          |          |          |
|---|----------|----------|----------|
| C | -3.92760 | 1.98763  | 0.72360  |
| C | 4.02323  | 2.46528  | -0.77190 |
| C | 3.87897  | 1.17094  | 1.36734  |
| H | -1.12944 | -1.22335 | -2.63598 |
| H | -2.53119 | -3.34147 | 0.88670  |
| H | 1.90260  | -1.97847 | -1.44012 |
| H | -2.77890 | -0.73032 | 1.35227  |
| H | 1.14000  | -3.95328 | 0.21387  |
| H | -1.52264 | -3.66225 | -1.58485 |
| H | 0.51012  | -0.16746 | 2.25091  |
| H | -4.21457 | 2.58773  | 1.59320  |
| H | -4.60673 | 2.23749  | -0.09372 |
| H | -4.08520 | 0.93963  | 0.97501  |
| H | -2.72075 | 4.40292  | 0.72148  |
| H | -1.33797 | 4.02732  | -0.31863 |
| H | -2.98257 | 3.96396  | -0.96806 |
| H | -1.82852 | 2.72078  | 2.35234  |
| H | -1.60509 | 1.02796  | 1.90322  |
| H | -0.50675 | 2.25188  | 1.27049  |
| H | 4.95292  | 1.29390  | 1.53443  |
| H | 3.36509  | 1.99893  | 1.86102  |
| H | 3.56988  | 0.24151  | 1.85036  |
| H | 5.41287  | 0.12126  | -0.66311 |
| H | 4.06601  | -0.97124 | -0.33653 |
| H | 4.12509  | -0.07169 | -1.85787 |
| H | 5.10008  | 2.60397  | -0.63942 |
| H | 3.81624  | 2.47982  | -1.84487 |
| H | 3.51488  | 3.31836  | -0.31760 |
| H | 0.28213  | -2.83354 | 2.49970  |
| H | -3.11747 | 1.36331  | -1.84947 |
| H | 1.70462  | 0.79371  | -1.74047 |

55

isomer-1 of  $8c^+[AlCl_4]^-$  SCF done: -5074.302603

|    |          |          |          |
|----|----------|----------|----------|
| C  | 2.47044  | -1.68358 | -2.52911 |
| C  | 3.57690  | -1.66817 | -1.63940 |
| C  | 3.08168  | -1.63799 | -0.31336 |
| C  | 1.65550  | -1.64078 | -0.38469 |
| C  | 1.28115  | -1.66913 | -1.76433 |
| Fe | 2.40187  | 0.00025  | -1.32846 |
| C  | 1.28062  | 1.66913  | -1.76420 |
| C  | 2.46983  | 1.68388  | -2.52912 |
| C  | 3.57641  | 1.66876  | -1.63951 |
| C  | 3.08134  | 1.63847  | -0.31339 |
| C  | 1.65514  | 1.64094  | -0.38459 |
| P  | 0.51749  | 1.49211  | 0.98456  |
| P  | 1.01780  | -0.00012 | 2.41520  |
| P  | 0.51773  | -1.49225 | 0.98438  |
| C  | 0.27542  | -3.13713 | 1.76982  |
| C  | -0.90749 | -3.02286 | 2.73755  |
| C  | -0.05304 | -4.13144 | 0.65010  |
| C  | 1.55028  | -3.55308 | 2.50562  |
| C  | 0.27511  | 3.13694  | 1.77012  |
| C  | -0.90765 | 3.02251  | 2.73798  |

|    |          |          |          |
|----|----------|----------|----------|
| C  | 1.55004  | 3.55295  | 2.50575  |
| C  | -0.05360 | 4.13129  | 0.65051  |
| Cl | -2.43141 | -1.75123 | -1.64804 |
| Al | -3.42481 | -0.00002 | -0.83626 |
| Cl | -2.43153 | 1.75145  | -1.64745 |
| Cl | -3.03896 | -0.00053 | 1.29792  |
| Cl | -5.49561 | -0.00007 | -1.27359 |
| H  | 0.26857  | -1.65090 | -2.13753 |
| H  | 4.61660  | -1.64969 | -1.92297 |
| H  | 0.26799  | 1.65078  | -2.13726 |
| H  | 3.66675  | -1.58154 | 0.59038  |
| H  | 2.52312  | 1.67651  | -3.60556 |
| H  | 2.52378  | -1.67608 | -3.60555 |
| H  | 3.66648  | 1.58221  | 0.59031  |
| H  | -0.25408 | -5.10682 | 1.09847  |
| H  | -0.93904 | -3.82838 | 0.08893  |
| H  | 0.77724  | -4.24611 | -0.04813 |
| H  | -1.10178 | -4.00752 | 3.16856  |
| H  | -0.70068 | -2.32784 | 3.55181  |
| H  | -1.81292 | -2.68776 | 2.22871  |
| H  | 1.39218  | -4.53368 | 2.95975  |
| H  | 2.40057  | -3.63438 | 1.82574  |
| H  | 1.80704  | -2.85353 | 3.30338  |
| H  | 1.39191  | 4.53349  | 2.96002  |
| H  | 1.80702  | 2.85334  | 3.30340  |
| H  | 2.40020  | 3.63443  | 1.82573  |
| H  | -0.25462 | 5.10664  | 1.09898  |
| H  | 0.77655  | 4.24607  | -0.04786 |
| H  | -0.93968 | 3.82822  | 0.08948  |
| H  | -1.10198 | 4.00712  | 3.16910  |
| H  | -1.81313 | 2.68743  | 2.22919  |
| H  | -0.70079 | 2.32742  | 3.55215  |
| H  | 4.61610  | 1.65061  | -1.92316 |
| H  | -0.69771 | -1.24340 | 0.32905  |
| H  | -0.69796 | 1.24318  | 0.32926  |

50

isomer-2 of **8c<sup>+</sup>**

SCF done: -2990.4925081

|    |          |          |          |
|----|----------|----------|----------|
| C  | -3.08796 | -1.35453 | -1.20416 |
| C  | -3.48021 | -0.94862 | 0.09525  |
| C  | -2.73847 | 0.20136  | 0.44647  |
| C  | -1.86634 | 0.51221  | -0.64577 |
| C  | -2.09589 | -0.46442 | -1.66910 |
| Fe | -1.44214 | -1.33710 | 0.06008  |
| C  | -0.02189 | -2.74908 | -0.38867 |
| C  | -0.90600 | -3.27342 | 0.58026  |
| C  | -0.86428 | -2.43426 | 1.72121  |
| C  | 0.04101  | -1.37815 | 1.46839  |
| C  | 0.56943  | -1.56371 | 0.15089  |
| P  | 1.75434  | -0.56797 | -0.73793 |
| P  | 1.19024  | 1.24271  | -1.73780 |
| P  | -0.63270 | 1.79765  | -0.80221 |
| C  | -0.61417 | 2.92920  | 0.66344  |
| C  | 0.43078  | 4.01003  | 0.35834  |

|   |          |          |          |
|---|----------|----------|----------|
| C | -1.99602 | 3.58384  | 0.78967  |
| C | -0.22604 | 2.18914  | 1.94183  |
| C | 3.33982  | -0.48417 | 0.20556  |
| C | 4.40122  | 0.05623  | -0.76044 |
| C | 3.20288  | 0.44938  | 1.40683  |
| C | 3.69603  | -1.90535 | 0.65231  |
| H | -1.57889 | -0.51465 | -2.61387 |
| H | -4.20188 | -1.44363 | 0.72434  |
| H | 0.16108  | -3.15446 | -1.37096 |
| H | -2.81285 | 0.72292  | 1.38446  |
| H | -1.52145 | -4.14986 | 0.46029  |
| H | -3.45921 | -2.21431 | -1.73754 |
| H | 0.27825  | -0.57717 | 2.14676  |
| H | -1.97170 | 4.29120  | 1.62078  |
| H | -2.25781 | 4.14440  | -0.10936 |
| H | -2.79238 | 2.86857  | 0.98726  |
| H | 0.42491  | 4.73684  | 1.17254  |
| H | 1.43497  | 3.59422  | 0.27649  |
| H | 0.20772  | 4.54738  | -0.56571 |
| H | -0.15145 | 2.90950  | 2.75841  |
| H | -0.95777 | 1.43581  | 2.22935  |
| H | 0.74852  | 1.71020  | 1.84024  |
| H | 4.16837  | 0.52133  | 1.91058  |
| H | 2.91412  | 1.45588  | 1.09884  |
| H | 2.48378  | 0.07557  | 2.13721  |
| H | 4.66888  | -1.88522 | 1.14694  |
| H | 2.96857  | -2.30714 | 1.35829  |
| H | 3.77258  | -2.59136 | -0.19387 |
| H | 5.35949  | 0.09899  | -0.23981 |
| H | 4.52745  | -0.58976 | -1.63166 |
| H | 4.16384  | 1.06438  | -1.10422 |
| H | -1.44321 | -2.56084 | 2.62142  |
| H | -1.12807 | 2.66697  | -1.78761 |
| H | 2.10830  | -1.43097 | -1.78635 |

66

**8b<sup>+</sup>** SCF done: -3600.1934197

|   |         |          |          |
|---|---------|----------|----------|
| C | 1.05030 | 1.40145  | -1.95993 |
| C | 1.77653 | 1.41845  | -0.77136 |
| C | 2.53576 | 2.54157  | -0.45172 |
| C | 2.56911 | 3.62582  | -1.31325 |
| C | 1.85120 | 3.59729  | -2.49878 |
| C | 1.09362 | 2.48231  | -2.82189 |
| P | 1.66332 | 0.06550  | 0.42618  |
| C | 3.18150 | 0.09957  | 1.39984  |
| C | 3.25116 | 0.79004  | 2.60742  |
| C | 4.44423 | 0.83202  | 3.31023  |
| C | 5.56778 | 0.19135  | 2.81134  |
| C | 5.50169 | -0.49508 | 1.60763  |
| C | 4.31276 | -0.54329 | 0.90107  |
| C | 1.68625 | -1.47665 | -0.47986 |
| C | 1.85395 | -1.72437 | -1.87845 |
| C | 1.74026 | -3.11746 | -2.08626 |

|    |          |          |          |
|----|----------|----------|----------|
| C  | 1.52416  | -3.74117 | -0.83159 |
| C  | 1.48909  | -2.73965 | 0.16359  |
| Fe | 0.01631  | -2.37209 | -1.19785 |
| C  | -1.60502 | -1.27441 | -0.61134 |
| C  | -1.72936 | -2.62865 | -0.16946 |
| C  | -1.73244 | -3.46317 | -1.31088 |
| C  | -1.59977 | -2.64514 | -2.46094 |
| C  | -1.52193 | -1.29645 | -2.04052 |
| P  | -1.56367 | 0.11878  | 0.52496  |
| C  | -1.83946 | 1.63126  | -0.43136 |
| C  | -1.18019 | 2.80005  | -0.06935 |
| C  | -1.43786 | 3.97973  | -0.74703 |
| C  | -2.35534 | 3.99719  | -1.78506 |
| C  | -3.03148 | 2.83679  | -2.13636 |
| C  | -2.78291 | 1.65694  | -1.45726 |
| P  | 0.09053  | 0.14883  | 1.87254  |
| C  | -3.02232 | -0.04785 | 1.57969  |
| C  | -3.06864 | 0.62986  | 2.79611  |
| C  | -4.21087 | 0.57225  | 3.57579  |
| C  | -5.31228 | -0.15126 | 3.14395  |
| C  | -5.27290 | -0.81750 | 1.92897  |
| C  | -4.13224 | -0.76747 | 1.14496  |
| H  | 1.31503  | -2.88511 | 1.21741  |
| H  | 1.78971  | -3.61464 | -3.04128 |
| H  | -1.54578 | -2.98837 | -3.48111 |
| H  | -1.79553 | -2.94813 | 0.85818  |
| H  | 2.03371  | -0.98595 | -2.64073 |
| H  | -1.79258 | -4.53914 | -1.30233 |
| H  | 1.37528  | -4.79581 | -0.66679 |
| H  | -1.42988 | -0.43969 | -2.68664 |
| H  | -0.45660 | 2.78160  | 0.73566  |
| H  | -0.91622 | 4.88456  | -0.46489 |
| H  | -2.55440 | 4.91880  | -2.31656 |
| H  | -3.76296 | 2.85374  | -2.93362 |
| H  | -3.33446 | 0.76370  | -1.72195 |
| H  | -2.21780 | 1.20644  | 3.13792  |
| H  | -4.24029 | 1.09542  | 4.52232  |
| H  | -6.20403 | -0.19465 | 3.75553  |
| H  | -6.13213 | -1.38046 | 1.58906  |
| H  | -4.11193 | -1.29501 | 0.20031  |
| H  | 2.37881  | 1.29639  | 3.00145  |
| H  | 4.49384  | 1.36517  | 4.25032  |
| H  | 6.49798  | 0.22429  | 3.36352  |
| H  | 6.37743  | -0.99781 | 1.21916  |
| H  | 4.26633  | -1.08770 | -0.03371 |
| H  | 3.11003  | 2.57228  | 0.46503  |
| H  | 3.16612  | 4.49178  | -1.05931 |
| H  | 1.88332  | 4.44422  | -3.17173 |
| H  | 0.52544  | 2.45747  | -3.74238 |
| H  | 0.43872  | 0.54833  | -2.21161 |

71

**8b**<sup>+</sup>[AlCl<sub>4</sub>]<sup>-</sup> SCF done: -5683.968562

|   |         |          |         |
|---|---------|----------|---------|
| C | 1.32538 | -1.09114 | 2.49840 |
|---|---------|----------|---------|

|    |          |          |          |
|----|----------|----------|----------|
| C  | 0.49690  | -1.76759 | 1.60438  |
| C  | -0.60776 | -2.45981 | 2.08939  |
| C  | -0.87644 | -2.47330 | 3.44868  |
| C  | -0.04426 | -1.80610 | 4.33130  |
| C  | 1.06117  | -1.11678 | 3.85447  |
| P  | 0.74600  | -1.66027 | -0.18621 |
| C  | -0.03989 | -3.10880 | -0.91620 |
| C  | -1.36467 | -3.04470 | -1.34022 |
| C  | -1.97156 | -4.17529 | -1.86369 |
| C  | -1.26459 | -5.36266 | -1.96160 |
| C  | 0.05579  | -5.42740 | -1.53637 |
| C  | 0.67053  | -4.30390 | -1.01329 |
| C  | 2.50937  | -1.83450 | -0.48347 |
| C  | 3.58039  | -2.08552 | 0.42815  |
| C  | 4.79001  | -2.05726 | -0.30378 |
| C  | 4.48047  | -1.81152 | -1.66604 |
| C  | 3.07925  | -1.67214 | -1.78421 |
| Fe | 3.78990  | -0.25251 | -0.50115 |
| C  | 2.69283  | 1.46067  | -0.23456 |
| C  | 3.45381  | 1.53084  | -1.44146 |
| C  | 4.82401  | 1.42357  | -1.10649 |
| C  | 4.92584  | 1.27427  | 0.30011  |
| C  | 3.61848  | 1.29789  | 0.84311  |
| P  | 0.88899  | 1.53845  | -0.22274 |
| C  | 0.34416  | 1.81890  | 1.47768  |
| C  | -0.85250 | 1.24635  | 1.88987  |
| C  | -1.33949 | 1.50044  | 3.16112  |
| C  | -0.63188 | 2.32227  | 4.02128  |
| C  | 0.55551  | 2.91303  | 3.60536  |
| C  | 1.04007  | 2.67346  | 2.33220  |
| P  | -0.10148 | -0.02725 | -1.26344 |
| C  | 0.45130  | 3.03646  | -1.13418 |
| C  | -0.84454 | 3.16119  | -1.62905 |
| C  | -1.22830 | 4.33218  | -2.26105 |
| C  | -0.32846 | 5.37712  | -2.39853 |
| C  | 0.96006  | 5.25713  | -1.89806 |
| C  | 1.35202  | 4.09095  | -1.26318 |
| Cl | -3.55891 | -1.16124 | 1.05906  |
| Al | -4.47909 | 0.18470  | -0.38383 |
| Cl | -3.75590 | -0.34705 | -2.34754 |
| Cl | -6.60003 | 0.02092  | -0.27549 |
| Cl | -3.82403 | 2.18673  | 0.09433  |
| H  | 2.52619  | -1.44668 | -2.68156 |
| H  | 5.77738  | -2.18128 | 0.11044  |
| H  | 5.83679  | 1.14430  | 0.86120  |
| H  | 3.04070  | 1.63069  | -2.43232 |
| H  | 3.48566  | -2.25721 | 1.48660  |
| H  | 5.64435  | 1.42176  | -1.80546 |
| H  | 5.19238  | -1.71072 | -2.46900 |
| H  | 3.36801  | 1.21713  | 1.88740  |
| H  | -1.41401 | 0.60169  | 1.22647  |
| H  | -2.27726 | 1.05200  | 3.46085  |
| H  | -1.01088 | 2.51965  | 5.01614  |
| H  | 1.09595  | 3.57482  | 4.27010  |

|   |          |          |          |
|---|----------|----------|----------|
| H | 1.94823  | 3.16399  | 2.00484  |
| H | -1.57079 | 2.36658  | -1.50646 |
| H | -2.23973 | 4.42179  | -2.63428 |
| H | -0.63255 | 6.29122  | -2.89247 |
| H | 1.66241  | 6.07442  | -1.99977 |
| H | 2.35873  | 4.00650  | -0.87442 |
| H | -1.93760 | -2.12856 | -1.26054 |
| H | -3.00078 | -4.11414 | -2.19153 |
| H | -1.74203 | -6.24354 | -2.37182 |
| H | 0.60832  | -6.35475 | -1.61447 |
| H | 1.70214  | -4.35648 | -0.68781 |
| H | -1.27635 | -2.97228 | 1.41244  |
| H | -1.75020 | -2.99877 | 3.81005  |
| H | -0.26114 | -1.81431 | 5.39180  |
| H | 1.70670  | -0.57976 | 4.53715  |
| H | 2.17033  | -0.52688 | 2.13541  |

98

**3<sup>+</sup>** SCF done: -3844.537833

|    |          |          |          |
|----|----------|----------|----------|
| C  | -1.83218 | 2.91781  | -0.47881 |
| C  | -1.38345 | 1.61821  | -0.87625 |
| C  | -0.84784 | 1.71935  | -2.20336 |
| C  | -0.95983 | 3.07060  | -2.60116 |
| C  | -1.56293 | 3.80327  | -1.54631 |
| P  | -1.48905 | 0.13625  | 0.07522  |
| P  | -0.01889 | -0.77941 | 1.05244  |
| P  | 1.68952  | 0.51778  | 1.20657  |
| C  | 1.62338  | 2.07325  | 0.29718  |
| C  | 2.16733  | 2.40606  | -0.97983 |
| C  | 2.00747  | 3.79698  | -1.17856 |
| C  | 1.37502  | 4.34091  | -0.03149 |
| C  | 1.14430  | 3.28804  | 0.88374  |
| Fe | 0.17441  | 2.89039  | -0.87747 |
| C  | -3.12449 | -0.56936 | 0.16210  |
| C  | -3.96109 | -0.24899 | 1.24501  |
| C  | -5.21697 | -0.82820 | 1.27932  |
| C  | -5.66557 | -1.68038 | 0.27565  |
| C  | -4.82340 | -1.94599 | -0.79428 |
| C  | -3.54855 | -1.40675 | -0.87968 |
| C  | -3.52839 | 0.68546  | 2.35708  |
| C  | -4.55968 | 1.77835  | 2.63658  |
| C  | -2.68652 | -1.70264 | -2.08959 |
| C  | -3.27060 | -1.06136 | -3.34927 |
| C  | -7.04538 | -2.29418 | 0.34237  |
| C  | -8.13423 | -1.21974 | 0.30709  |
| C  | 3.07207  | -0.47715 | 0.54609  |
| C  | 3.08750  | -1.07917 | -0.72750 |
| C  | 4.19842  | -1.83007 | -1.09080 |
| C  | 5.29276  | -1.99068 | -0.25979 |
| C  | 5.26623  | -1.36718 | 0.97999  |
| C  | 4.18445  | -0.61770 | 1.41007  |
| C  | 1.95985  | -0.97668 | -1.74229 |
| C  | 2.45038  | -0.55224 | -3.13043 |



|   |          |          |          |
|---|----------|----------|----------|
| C | 6.48339  | -2.81555 | -0.69194 |
| C | 6.69136  | -4.01775 | 0.23128  |
| C | 4.26518  | 0.08636  | 2.75582  |
| C | 5.12901  | -0.63484 | 3.78809  |
| C | 1.19359  | -2.29739 | -1.85422 |
| C | 7.74927  | -1.96108 | -0.78332 |
| C | 4.75236  | 1.52686  | 2.55974  |
| C | -2.44439 | -3.20030 | -2.27009 |
| C | -7.19350 | -3.19622 | 1.56932  |
| C | -3.17781 | -0.09896 | 3.62165  |
| H | 4.21432  | -2.30986 | -2.06223 |
| H | -2.61313 | 1.19389  | 2.03085  |
| H | 3.25580  | 0.13268  | 3.16936  |
| H | 6.12055  | -1.47458 | 1.63427  |
| H | 1.26486  | -0.20775 | -1.40417 |
| H | -1.70334 | -1.24619 | -1.92242 |
| H | 6.26527  | -3.19695 | -1.69328 |
| H | 2.62118  | 1.71717  | -1.66926 |
| H | -5.17664 | -2.59428 | -1.58757 |
| H | 1.09897  | 5.37303  | 0.11056  |
| H | -4.05024 | -0.64126 | 3.99129  |
| H | -2.83907 | 0.57466  | 4.41016  |
| H | -2.38939 | -0.82926 | 3.42934  |
| H | -1.75823 | 4.86311  | -1.54542 |
| H | 5.75760  | 1.53290  | 2.13282  |
| H | 4.78466  | 2.05253  | 3.51541  |
| H | 4.10388  | 2.09116  | 1.88571  |
| H | 1.84785  | -3.09065 | -2.21988 |
| H | 0.36236  | -2.20059 | -2.55584 |
| H | 0.79203  | -2.62507 | -0.89388 |
| H | -0.43029 | 0.90982  | -2.77993 |
| H | -7.16343 | -2.91845 | -0.54716 |
| H | 0.68161  | 3.37486  | 1.85413  |
| H | 3.10907  | 0.31567  | -3.09183 |
| H | 1.59979  | -0.30711 | -3.76996 |
| H | 3.00109  | -1.35398 | -3.62364 |
| H | -0.62169 | 3.47807  | -3.53977 |
| H | 7.60732  | -1.11213 | -1.45361 |
| H | 8.58212  | -2.55731 | -1.15877 |
| H | 8.03446  | -1.57329 | 0.19703  |
| H | 2.30041  | 4.34434  | -2.05963 |
| H | -5.87295 | -0.60605 | 2.11181  |
| H | -5.47683 | 1.36706  | 3.06051  |
| H | -4.82430 | 2.31788  | 1.72581  |
| H | -4.16082 | 2.49251  | 3.35845  |
| H | -2.27837 | 3.17246  | 0.46888  |
| H | 4.85574  | -1.68695 | 3.87851  |
| H | 4.99681  | -0.16553 | 4.76363  |
| H | 6.19223  | -0.57554 | 3.54788  |
| H | -6.42589 | -3.97102 | 1.58788  |
| H | -8.16962 | -3.68294 | 1.56355  |
| H | -7.11592 | -2.62079 | 2.49442  |
| H | 6.93959  | -3.69728 | 1.24542  |
| H | 7.51348  | -4.63613 | -0.13182 |

|   |          |          |          |
|---|----------|----------|----------|
| H | 5.79499  | -4.63733 | 0.28364  |
| H | -1.99100 | -3.63727 | -1.37922 |
| H | -1.77782 | -3.37706 | -3.11562 |
| H | -3.37634 | -3.73150 | -2.46952 |
| H | -4.24322 | -1.49223 | -3.59313 |
| H | -2.60932 | -1.22804 | -4.20141 |
| H | -3.40248 | 0.01431  | -3.22020 |
| H | -8.08640 | -0.57981 | 1.19091  |
| H | -9.12117 | -1.68372 | 0.28748  |
| H | -8.03784 | -0.58527 | -0.57505 |

103

$3^+[\text{AlCl}_4]^-$  SCF done: -5928.317488

|    |          |          |          |
|----|----------|----------|----------|
| C  | -1.37883 | -2.05302 | 2.84447  |
| C  | -1.51820 | -0.93472 | 1.95285  |
| C  | -1.71505 | 0.24053  | 2.74377  |
| C  | -1.68650 | -0.15238 | 4.09905  |
| C  | -1.48628 | -1.55641 | 4.16252  |
| P  | -1.43939 | -0.99084 | 0.18651  |
| P  | 0.19758  | -1.35351 | -0.89364 |
| P  | 1.83749  | -1.69968 | 0.42318  |
| C  | 1.76083  | -0.87008 | 2.01950  |
| C  | 1.58875  | 0.50133  | 2.38910  |
| C  | 1.60511  | 0.57554  | 3.79921  |
| C  | 1.79085  | -0.73130 | 4.32009  |
| C  | 1.89260  | -1.62549 | 3.23010  |
| Fe | 0.08531  | -0.67098 | 3.15110  |
| C  | -3.00740 | -1.22904 | -0.65131 |
| C  | -3.62368 | -2.49325 | -0.62261 |
| C  | -4.84455 | -2.63147 | -1.25894 |
| C  | -5.45667 | -1.57238 | -1.91907 |
| C  | -4.81957 | -0.34231 | -1.93077 |
| C  | -3.59889 | -0.13543 | -1.30205 |
| C  | -3.02167 | -3.69236 | 0.08213  |
| C  | -3.85609 | -4.09225 | 1.29966  |
| C  | -2.92812 | 1.21719  | -1.36871 |
| C  | -3.88455 | 2.38819  | -1.16191 |
| C  | -6.79116 | -1.75643 | -2.60636 |
| C  | -7.88727 | -2.12322 | -1.60411 |
| C  | 3.29171  | -1.14242 | -0.52870 |
| C  | 3.41640  | 0.13254  | -1.10887 |
| C  | 4.54924  | 0.40285  | -1.87039 |
| C  | 5.55983  | -0.51995 | -2.05593 |
| C  | 5.43057  | -1.76211 | -1.44808 |
| C  | 4.32190  | -2.10090 | -0.69255 |
| C  | 2.41503  | 1.25833  | -0.94469 |
| C  | 3.05583  | 2.45297  | -0.23358 |
| C  | 6.77649  | -0.18264 | -2.88826 |
| C  | 6.89649  | -1.10541 | -4.10237 |
| C  | 4.29814  | -3.45583 | -0.00209 |
| C  | 4.98260  | -4.57081 | -0.79026 |
| C  | 1.79226  | 1.68141  | -2.27619 |
| C  | 8.05336  | -0.20743 | -2.04610 |
| C  | 4.90538  | -3.33365 | 1.39964  |

|    |          |          |          |
|----|----------|----------|----------|
| C  | -2.14943 | 1.36412  | -2.67711 |
| C  | -6.70249 | -2.78714 | -3.73322 |
| C  | -2.81169 | -4.86749 | -0.87309 |
| Cl | -0.49103 | 2.77905  | 0.71573  |
| Al | -0.63915 | 4.88402  | 0.09877  |
| Cl | -0.62032 | 4.89035  | -2.05023 |
| Cl | -2.49039 | 5.63124  | 0.85775  |
| Cl | 1.07207  | 5.88231  | 0.89536  |
| H  | 4.64531  | 1.37935  | -2.33003 |
| H  | -2.02964 | -3.41113 | 0.44338  |
| H  | 3.25475  | -3.75202 | 0.11802  |
| H  | 6.22296  | -2.48858 | -1.57124 |
| H  | 1.59608  | 0.91571  | -0.31302 |
| H  | -2.19708 | 1.27276  | -0.55605 |
| H  | 6.64056  | 0.83766  | -3.25690 |
| H  | 1.41848  | 1.33382  | 1.72792  |
| H  | -5.29089 | 0.48751  | -2.44242 |
| H  | 1.82324  | -1.00047 | 5.36329  |
| H  | -3.76145 | -5.24494 | -1.25609 |
| H  | -2.31226 | -5.68921 | -0.35675 |
| H  | -2.19818 | -4.57421 | -1.72624 |
| H  | -1.39817 | -2.14362 | 5.06207  |
| H  | 5.95504  | -3.03815 | 1.33471  |
| H  | 4.85175  | -4.28811 | 1.92773  |
| H  | 4.38836  | -2.58074 | 1.99764  |
| H  | 2.54016  | 2.10836  | -2.94710 |
| H  | 1.02755  | 2.44003  | -2.10427 |
| H  | 1.33035  | 0.83445  | -2.78933 |
| H  | -1.81106 | 1.24551  | 2.36411  |
| H  | -7.05687 | -0.79510 | -3.05373 |
| H  | 2.02098  | -2.69474 | 3.28679  |
| H  | 3.51394  | 2.15166  | 0.71045  |
| H  | 2.30709  | 3.21697  | -0.02484 |
| H  | 3.83189  | 2.90886  | -0.85093 |
| H  | -1.77307 | 0.51353  | 4.94192  |
| H  | 7.97398  | 0.46448  | -1.19040 |
| H  | 8.91166  | 0.10095  | -2.64584 |
| H  | 8.25511  | -1.21227 | -1.66783 |
| H  | 1.46126  | 1.47603  | 4.37408  |
| H  | -5.33656 | -3.59676 | -1.23981 |
| H  | -4.85363 | -4.41866 | 0.99918  |
| H  | -3.97011 | -3.25559 | 1.99063  |
| H  | -3.38080 | -4.91756 | 1.83384  |
| H  | -1.21075 | -3.07781 | 2.55751  |
| H  | 4.62061  | -4.61472 | -1.81840 |
| H  | 4.77916  | -5.53236 | -0.31591 |
| H  | 6.06743  | -4.45072 | -0.81566 |
| H  | -5.93103 | -2.51697 | -4.45560 |
| H  | -7.65579 | -2.85695 | -4.25995 |
| H  | -6.46525 | -3.77921 | -3.34219 |
| H  | 7.05762  | -2.14116 | -3.79456 |
| H  | 7.74195  | -0.80772 | -4.72531 |
| H  | 5.99291  | -1.07296 | -4.71278 |
| H  | -1.40946 | 0.56887  | -2.79581 |

|   |          |          |          |
|---|----------|----------|----------|
| H | -1.63044 | 2.32300  | -2.69339 |
| H | -2.82675 | 1.32022  | -3.53369 |
| H | -4.57132 | 2.50516  | -2.00298 |
| H | -3.31541 | 3.31382  | -1.07636 |
| H | -4.47183 | 2.26894  | -0.25032 |
| H | -7.68768 | -3.09173 | -1.13973 |
| H | -8.85458 | -2.18778 | -2.10538 |
| H | -7.96173 | -1.37839 | -0.81068 |

100

|                |                        |          |          |
|----------------|------------------------|----------|----------|
| 5 <sup>+</sup> | SCF done: -4646.181563 |          |          |
| C              | 3.74060                | -0.45653 | 1.35642  |
| C              | 3.04802                | -0.58630 | 0.14131  |
| C              | 3.60997                | -1.31981 | -0.92516 |
| C              | 4.78892                | -2.00719 | -0.69236 |
| C              | 5.44468                | -1.97598 | 0.53046  |
| C              | 4.91630                | -1.17308 | 1.52652  |
| P              | 1.42525                | 0.18576  | -0.07081 |
| P              | 0.00005                | -0.08637 | 1.58248  |
| Cl             | 0.00007                | 1.58412  | 2.86143  |
| C              | 3.06575                | -1.32536 | -2.34232 |
| C              | 2.72587                | -2.73166 | -2.83539 |
| C              | 6.71927                | -2.75668 | 0.75226  |
| C              | 6.48709                | -4.25927 | 0.58326  |
| C              | 3.30852                | 0.47765  | 2.46521  |
| C              | 2.95964                | -0.26938 | 3.75196  |
| C              | 1.60707                | 1.86654  | -0.65242 |
| C              | 1.62795                | 2.22833  | -2.03745 |
| C              | 1.68520                | 3.63904  | -2.11073 |
| C              | 1.70503                | 4.15590  | -0.79058 |
| C              | 1.66550                | 3.07171  | 0.11606  |
| Fe             | -0.00001               | 3.00968  | -1.08466 |
| C              | -1.68524               | 3.63900  | -2.11072 |
| C              | -1.62796               | 2.22829  | -2.03743 |
| C              | -1.60707               | 1.86651  | -0.65240 |
| C              | -1.66551               | 3.07169  | 0.11607  |
| C              | -1.70507               | 4.15587  | -0.79058 |
| P              | -1.42522               | 0.18575  | -0.07074 |
| P              | 0.00000                | -1.02388 | -1.12311 |
| C              | -3.04799               | -0.58632 | 0.14139  |
| C              | -3.74055               | -0.45664 | 1.35652  |
| C              | -4.91625               | -1.17320 | 1.52658  |
| C              | -5.44465               | -1.97602 | 0.53048  |
| C              | -4.78892               | -2.00713 | -0.69236 |
| C              | -3.60997               | -1.31975 | -0.92513 |
| C              | -3.30849               | 0.47749  | 2.46534  |
| C              | -2.95972               | -0.26958 | 3.75211  |
| C              | -6.71925               | -2.75673 | 0.75224  |
| C              | -7.84061               | -2.26081 | -0.16332 |
| C              | -3.06583               | -1.32514 | -2.34232 |
| C              | -4.03860               | -0.61345 | -3.28762 |
| C              | -4.35923               | 1.56323  | 2.71126  |
| C              | -6.48709               | -4.25931 | 0.58312  |
| C              | -2.72599               | -2.73138 | -2.83558 |

|   |          |          |          |
|---|----------|----------|----------|
| C | 4.03848  | -0.61380 | -3.28777 |
| C | 4.35929  | 1.56336  | 2.71114  |
| C | 7.84063  | -2.26084 | -0.16334 |
| H | -5.44714 | -1.09210 | 2.46772  |
| H | 2.14297  | -0.74484 | -2.37374 |
| H | -2.14304 | -0.74463 | -2.37372 |
| H | -5.22267 | -2.57754 | -1.50444 |
| H | -2.41491 | 1.00893  | 2.13893  |
| H | 2.41497  | 1.00910  | 2.13874  |
| H | -7.02925 | -2.58013 | 1.78561  |
| H | -1.65130 | 3.14249  | 1.19033  |
| H | 5.44720  | -1.09192 | 2.46764  |
| H | -1.68716 | 4.22048  | -3.01809 |
| H | 3.62087  | -3.35055 | -2.91632 |
| H | 2.26677  | -2.68351 | -3.82394 |
| H | 2.03156  | -3.23338 | -2.15980 |
| H | 1.68710  | 4.22053  | -3.01809 |
| H | -4.98579 | -1.15002 | -3.36056 |
| H | -3.61195 | -0.55340 | -4.29040 |
| H | -4.25342 | 0.39936  | -2.94212 |
| H | -3.83889 | -0.76826 | 4.16338  |
| H | -2.58509 | 0.42473  | 4.50520  |
| H | -2.19770 | -1.03228 | 3.57964  |
| H | 1.65129  | 3.14251  | 1.19032  |
| H | 7.02929  | -2.58001 | 1.78562  |
| H | -1.57412 | 1.54631  | -2.87055 |
| H | -4.59133 | 2.10157  | 1.79100  |
| H | -3.98959 | 2.27972  | 3.44674  |
| H | -5.28761 | 1.14038  | 3.09770  |
| H | 1.72445  | 5.19879  | -0.51950 |
| H | -8.01693 | -1.19230 | -0.03213 |
| H | -8.76905 | -2.78968 | 0.05609  |
| H | -7.59900 | -2.43726 | -1.21383 |
| H | -1.72451 | 5.19877  | -0.51950 |
| H | 5.22263  | -2.57768 | -1.50439 |
| H | 4.98566  | -1.15039 | -3.36072 |
| H | 4.25335  | 0.39904  | -2.94241 |
| H | 3.61176  | -0.55386 | -4.29053 |
| H | 1.57412  | 1.54636  | -2.87058 |
| H | -2.03164 | -3.23319 | -2.16010 |
| H | -2.26694 | -2.68311 | -3.82415 |
| H | -3.62100 | -3.35026 | -2.91655 |
| H | 5.69742  | -4.61609 | 1.24581  |
| H | 7.40010  | -4.81040 | 0.81240  |
| H | 6.20233  | -4.50167 | -0.44298 |
| H | -6.20234 | -4.50163 | -0.44314 |
| H | -7.40010 | -4.81044 | 0.81224  |
| H | -5.69741 | -4.61618 | 1.24563  |
| H | 2.19757  | -1.03202 | 3.57946  |
| H | 2.58501  | 0.42496  | 4.50502  |
| H | 3.83875  | -0.76813 | 4.16328  |
| H | 5.28763  | 1.14050  | 3.09766  |
| H | 3.98963  | 2.27989  | 3.44657  |
| H | 4.59146  | 2.10165  | 1.79087  |

|   |         |          |          |
|---|---------|----------|----------|
| H | 7.59900 | -2.43737 | -1.21384 |
| H | 8.76907 | -2.78970 | 0.05609  |
| H | 8.01696 | -1.19233 | -0.03223 |

99

**4<sup>2+</sup>** SCF done: -4185.608037

|    |          |          |          |
|----|----------|----------|----------|
| C  | 3.65646  | -0.72436 | 1.38916  |
| C  | 3.05619  | -0.53947 | 0.12692  |
| C  | 3.65530  | -1.01852 | -1.05938 |
| C  | 4.80154  | -1.77839 | -0.93066 |
| C  | 5.38118  | -2.05094 | 0.30498  |
| C  | 4.80573  | -1.49498 | 1.43995  |
| P  | 1.50742  | 0.32166  | 0.02582  |
| P  | 0.00001  | -0.60869 | 1.29381  |
| P  | -0.00001 | -0.87693 | -0.99248 |
| P  | -1.50742 | 0.32166  | 0.02585  |
| C  | -3.05619 | -0.53948 | 0.12694  |
| C  | -3.65645 | -0.72441 | 1.38918  |
| C  | -4.80571 | -1.49504 | 1.43995  |
| C  | -5.38117 | -2.05097 | 0.30497  |
| C  | -4.80154 | -1.77837 | -0.93068 |
| C  | -3.65530 | -1.01848 | -1.05937 |
| C  | -3.16617 | -0.06083 | 2.66195  |
| C  | -2.81138 | -1.07412 | 3.75078  |
| C  | -6.63035 | -2.89215 | 0.40351  |
| C  | -7.80799 | -2.21032 | -0.29872 |
| C  | -3.16243 | -0.67097 | -2.45151 |
| C  | -4.18604 | 0.20779  | -3.17711 |
| C  | 3.16241  | -0.67106 | -2.45152 |
| C  | 2.80125  | -1.91117 | -3.26991 |
| C  | 6.63036  | -2.89212 | 0.40354  |
| C  | 6.39317  | -4.30192 | -0.14301 |
| C  | 3.16621  | -0.06073 | 2.66192  |
| C  | 2.81141  | -1.07397 | 3.75078  |
| C  | -1.59114 | 2.06969  | -0.17942 |
| C  | -1.64030 | 2.76770  | -1.43187 |
| C  | -1.69850 | 4.14732  | -1.13659 |
| C  | -1.69741 | 4.31237  | 0.27145  |
| C  | -1.63861 | 3.03828  | 0.87763  |
| Fe | -0.00000 | 3.26635  | -0.32043 |
| C  | 1.69748  | 4.31238  | 0.27124  |
| C  | 1.69843  | 4.14726  | -1.13679 |
| C  | 1.64019  | 2.76763  | -1.43200 |
| C  | 1.59113  | 2.06969  | -0.17951 |
| C  | 1.63872  | 3.03831  | 0.87749  |
| C  | -4.18837 | 0.96737  | 3.15658  |
| C  | -6.39319 | -4.30191 | -0.14316 |
| C  | -2.80130 | -1.91104 | -3.26996 |
| C  | 4.18602  | 0.20765  | -3.17718 |
| C  | 4.18843  | 0.96749  | 3.15649  |
| C  | 7.80799  | -2.21036 | -0.29878 |
| H  | -5.28630 | -1.65767 | 2.39695  |
| H  | 2.25508  | -0.06296 | -2.36379 |
| H  | -2.25508 | -0.06288 | -2.36375 |

|   |          |          |          |
|---|----------|----------|----------|
| H | -5.27669 | -2.15905 | -1.82597 |
| H | -2.25629 | 0.50652  | 2.43644  |
| H | 2.25633  | 0.50663  | 2.43639  |
| H | -6.87793 | -2.98019 | 1.46410  |
| H | -1.62355 | 2.83257  | 1.93580  |
| H | 5.28634  | -1.65757 | 2.39695  |
| H | -1.71806 | 4.94201  | -1.86467 |
| H | 3.68256  | -2.52412 | -3.46140 |
| H | 2.38839  | -1.62111 | -4.23672 |
| H | 2.07099  | -2.53940 | -2.75588 |
| H | 1.71792  | 4.94193  | -1.86490 |
| H | -5.11649 | -0.33418 | -3.34890 |
| H | -3.79782 | 0.51438  | -4.14934 |
| H | -4.42272 | 1.10253  | -2.59902 |
| H | -3.69519 | -1.62154 | 4.07968  |
| H | -2.39881 | -0.56513 | 4.62257  |
| H | -2.08243 | -1.80801 | 3.40123  |
| H | 1.62376  | 2.83265  | 1.93566  |
| H | 6.87798  | -2.98009 | 1.46413  |
| H | -1.62692 | 2.32288  | -2.41382 |
| H | -4.41932 | 1.70212  | 2.38350  |
| H | -3.80124 | 1.49245  | 4.03085  |
| H | -5.12145 | 0.48420  | 3.44775  |
| H | 1.71629  | 5.25390  | 0.79583  |
| H | -7.98606 | -1.21000 | 0.09799  |
| H | -8.71532 | -2.79764 | -0.15745 |
| H | -7.63386 | -2.12551 | -1.37357 |
| H | -1.71617 | 5.25387  | 0.79607  |
| H | 5.27668  | -2.15911 | -1.82595 |
| H | 5.11647  | -0.33433 | -3.34896 |
| H | 4.42272  | 1.10242  | -2.59913 |
| H | 3.79780  | 0.51420  | -4.14942 |
| H | 1.62670  | 2.32277  | -2.41393 |
| H | -2.07104 | -2.53930 | -2.75596 |
| H | -2.38844 | -1.62095 | -4.23676 |
| H | -3.68261 | -2.52397 | -3.46146 |
| H | 5.56093  | -4.79302 | 0.36299  |
| H | 7.28510  | -4.91133 | 0.00267  |
| H | 6.17910  | -4.28285 | -1.21378 |
| H | -6.17916 | -4.28277 | -1.21394 |
| H | -7.28512 | -4.91133 | 0.00252  |
| H | -5.56093 | -4.79305 | 0.36277  |
| H | 2.08245  | -1.80786 | 3.40126  |
| H | 2.39885  | -0.56494 | 4.62255  |
| H | 3.69521  | -1.62139 | 4.07970  |
| H | 5.12149  | 0.48430  | 3.44768  |
| H | 3.80131  | 1.49259  | 4.03075  |
| H | 4.41938  | 1.70219  | 2.38339  |
| H | 7.63382  | -2.12563 | -1.37363 |
| H | 8.71532  | -2.79767 | -0.15749 |
| H | 7.98607  | -1.21001 | 0.09785  |

109

5<sup>+</sup> [Al<sub>2</sub>Cl<sub>7</sub>]<sup>-</sup> SCF done: -8353.285864

|    |          |          |          |
|----|----------|----------|----------|
| C  | 3.74612  | 0.74887  | 1.40923  |
| C  | 3.26951  | 0.35389  | 0.14866  |
| C  | 3.65822  | 1.05361  | -1.00969 |
| C  | 4.38615  | 2.22302  | -0.85508 |
| C  | 4.76886  | 2.69943  | 0.38866  |
| C  | 4.47917  | 1.91915  | 1.49673  |
| P  | 2.07210  | -0.99044 | -0.00848 |
| C  | 2.91519  | -2.54965 | -0.28460 |
| C  | 3.22895  | -3.06961 | -1.58005 |
| C  | 3.79778  | -4.35259 | -1.40427 |
| C  | 3.84306  | -4.63358 | -0.01461 |
| C  | 3.30935  | -3.52479 | 0.68302  |
| Fe | 1.89065  | -4.26319 | -0.60823 |
| C  | 0.67829  | -5.90127 | -0.22994 |
| C  | 0.22590  | -4.76707 | 0.48434  |
| C  | -0.05748 | -3.73861 | -0.46657 |
| C  | 0.21035  | -4.26290 | -1.76974 |
| C  | 0.66572  | -5.59322 | -1.61448 |
| P  | -0.56054 | -2.04217 | -0.17123 |
| P  | 0.43772  | -0.52900 | -1.31468 |
| C  | 3.44779  | 0.53047  | -2.41874 |
| C  | 2.88977  | 1.57116  | -3.38619 |
| C  | 5.45219  | 4.03427  | 0.57604  |
| C  | 4.39781  | 5.09401  | 0.91689  |
| C  | 3.54289  | -0.06467 | 2.66834  |
| C  | 4.88266  | -0.53190 | 3.24248  |
| C  | -2.36342 | -1.92666 | -0.16200 |
| C  | -3.04092 | -1.50441 | -1.31958 |
| C  | -4.39612 | -1.22438 | -1.22098 |
| C  | -5.10468 | -1.39001 | -0.04364 |
| C  | -4.43063 | -1.91941 | 1.04710  |
| C  | -3.07686 | -2.19599 | 1.01945  |
| C  | -2.41054 | -1.42091 | -2.69644 |
| C  | -3.01137 | -2.48773 | -3.61725 |
| C  | -2.44859 | -2.81505 | 2.24825  |
| C  | -3.02588 | -4.20655 | 2.51659  |
| C  | -6.55803 | -0.99987 | 0.10239  |
| C  | -7.34360 | -1.02427 | -1.20463 |
| P  | 0.46581  | -1.02599 | 1.48435  |
| Cl | 0.94412  | -2.41227 | 3.02977  |
| C  | -2.55980 | -1.91077 | 3.47526  |
| C  | -6.65153 | 0.37982  | 0.76402  |
| C  | -2.51368 | -0.02435 | -3.30566 |
| C  | 4.76140  | -0.06795 | -2.93425 |
| C  | 2.71495  | 0.68085  | 3.71478  |
| C  | 6.29979  | 4.47337  | -0.61385 |
| Cl | -2.45144 | 1.29252  | 1.16910  |
| Al | -3.56117 | 2.97275  | 0.49283  |
| Cl | -2.05315 | 4.70784  | 0.42331  |
| Al | -0.01999 | 4.10424  | -0.43378 |
| Cl | -0.45210 | 3.00544  | -2.19801 |
| Cl | -4.98831 | 3.66477  | 1.89377  |
| Cl | -4.33038 | 2.73506  | -1.46878 |
| Cl | 0.98024  | 2.97735  | 1.06432  |



|    |          |          |          |
|----|----------|----------|----------|
| Cl | 0.91998  | 5.96551  | -0.81257 |
| H  | 4.82640  | 2.24863  | 2.46935  |
| H  | -1.34961 | -1.66397 | -2.61742 |
| H  | 2.72501  | -0.28619 | -2.39165 |
| H  | 4.66716  | 2.77381  | -1.74194 |
| H  | 3.00742  | -0.97714 | 2.40667  |
| H  | -1.38780 | -2.97001 | 2.05528  |
| H  | 6.11608  | 3.93038  | 1.44020  |
| H  | 3.18613  | -3.44261 | 1.74949  |
| H  | -4.98552 | -2.10616 | 1.95950  |
| H  | 4.11543  | -5.01218 | -2.19517 |
| H  | -3.55038 | 0.23785  | -3.52200 |
| H  | -1.95421 | 0.02014  | -4.24192 |
| H  | -2.12074 | 0.73789  | -2.63332 |
| H  | 0.97519  | -6.24836 | -2.41231 |
| H  | 5.52852  | 0.70398  | -3.02088 |
| H  | 4.61475  | -0.51000 | -3.92217 |
| H  | 5.13749  | -0.84090 | -2.26110 |
| H  | 3.24859  | 1.56269  | 4.07391  |
| H  | 2.51477  | 0.03436  | 4.57069  |
| H  | 1.76219  | 1.02144  | 3.30668  |
| H  | 0.14495  | -4.68083 | 1.55443  |
| H  | -7.01081 | -1.72966 | 0.78154  |
| H  | 3.03115  | -2.58171 | -2.52037 |
| H  | 5.46136  | -1.07859 | 2.49593  |
| H  | 4.71317  | -1.18845 | 4.09805  |
| H  | 5.48478  | 0.31180  | 3.58372  |
| H  | 0.99889  | -6.83191 | 0.20905  |
| H  | 7.01337  | 3.70191  | -0.90966 |
| H  | 6.85970  | 5.37367  | -0.35711 |
| H  | 5.67870  | 4.71785  | -1.47821 |
| H  | 4.20113  | -5.54476 | 0.43611  |
| H  | -4.90943 | -0.86574 | -2.10238 |
| H  | -4.07396 | -2.30707 | -3.78832 |
| H  | -2.90540 | -3.48643 | -3.18845 |
| H  | -2.50941 | -2.47124 | -4.58676 |
| H  | 0.11557  | -3.72057 | -2.69677 |
| H  | 1.97361  | 2.02047  | -3.00407 |
| H  | 2.66621  | 1.10173  | -4.34591 |
| H  | 3.60760  | 2.37103  | -3.57516 |
| H  | -6.09626 | 0.41670  | 1.70198  |
| H  | -7.69246 | 0.63474  | 0.97081  |
| H  | -6.24159 | 1.14604  | 0.10362  |
| H  | 3.69845  | 5.22454  | 0.08890  |
| H  | 4.87563  | 6.05493  | 1.11707  |
| H  | 3.81315  | 4.80773  | 1.79179  |
| H  | -2.15591 | -0.91685 | 3.27692  |
| H  | -2.01717 | -2.34526 | 4.31626  |
| H  | -3.60177 | -1.78508 | 3.77426  |
| H  | -4.08852 | -4.15301 | 2.75942  |
| H  | -2.51239 | -4.66993 | 3.36157  |
| H  | -2.91191 | -4.85362 | 1.64494  |
| H  | -7.01301 | -0.23278 | -1.88063 |
| H  | -8.40209 | -0.85359 | -1.00340 |

H -7.24537 -1.98202 -1.71942

109

$4^{2+} 2[\text{AlCl}_4]^-$  SCF done: -8353.242342

|    |          |          |          |
|----|----------|----------|----------|
| C  | 0.06420  | 4.74404  | 2.23656  |
| C  | -0.16835 | 3.35872  | 2.39468  |
| C  | 0.22976  | 2.71680  | 1.17814  |
| C  | 0.72915  | 3.71916  | 0.28859  |
| C  | 0.61333  | 4.96355  | 0.94742  |
| Fe | -1.22867 | 4.02257  | 0.78377  |
| C  | -2.27783 | 3.85012  | -0.95594 |
| C  | -2.68150 | 2.88725  | 0.02401  |
| C  | -3.18663 | 3.59411  | 1.16252  |
| C  | -3.06779 | 4.97572  | 0.88783  |
| C  | -2.51142 | 5.13236  | -0.40777 |
| P  | -2.59961 | 1.12506  | -0.13834 |
| C  | -4.10876 | 0.44142  | -0.79848 |
| C  | -5.11998 | 0.01118  | 0.07975  |
| C  | -6.19755 | -0.66221 | -0.46441 |
| C  | -6.31023 | -0.90007 | -1.82782 |
| C  | -5.34092 | -0.37828 | -2.67006 |
| C  | -4.23238 | 0.29940  | -2.19129 |
| C  | -5.12067 | 0.29914  | 1.56820  |
| C  | -6.23563 | 1.28937  | 1.91616  |
| C  | -7.44900 | -1.72376 | -2.38018 |
| C  | -8.81532 | -1.14905 | -2.00542 |
| C  | -3.24946 | 0.87970  | -3.18977 |
| C  | -3.91044 | 1.98959  | -4.01125 |
| P  | 0.17829  | 0.96713  | 0.88985  |
| P  | -1.63698 | -0.16828 | 1.34072  |
| P  | -0.83931 | 0.01328  | -0.78742 |
| C  | 1.69352  | 0.14045  | 1.26440  |
| C  | 1.90121  | -0.45468 | 2.52388  |
| C  | 3.06145  | -1.18276 | 2.69368  |
| C  | 4.00508  | -1.32632 | 1.68047  |
| C  | 3.79335  | -0.67361 | 0.47529  |
| C  | 2.65877  | 0.07944  | 0.23919  |
| C  | 0.95568  | -0.29262 | 3.69715  |
| C  | 0.37338  | -1.63093 | 4.15106  |
| C  | 2.56646  | 0.87203  | -1.04794 |
| C  | 3.54842  | 2.04578  | -0.99811 |
| C  | 5.24930  | -2.15518 | 1.88245  |
| C  | 4.88663  | -3.62720 | 2.08999  |
| C  | -5.20678 | -0.97429 | 2.40840  |
| C  | -7.30985 | -3.18061 | -1.92898 |
| C  | -2.62583 | -0.19383 | -4.08285 |
| C  | 2.76344  | 0.00542  | -2.29109 |
| C  | 6.10087  | -1.61312 | 3.03086  |
| C  | 1.63847  | 0.45042  | 4.84820  |
| Cl | 0.37291  | -2.90682 | 0.21714  |
| Al | -1.57121 | -3.87536 | 0.24162  |
| Cl | -1.48545 | -5.89497 | -0.36308 |
| Cl | -2.39273 | -3.61463 | 2.22021  |
| Cl | -2.82388 | -2.69713 | -1.10587 |

|    |          |          |          |
|----|----------|----------|----------|
| Cl | 7.03634  | 0.83922  | 0.12062  |
| Al | 7.31479  | 0.03850  | -1.87969 |
| Cl | 6.31372  | 1.34624  | -3.27657 |
| Cl | 6.31306  | -1.88279 | -1.93870 |
| Cl | 9.38705  | -0.15691 | -2.32968 |
| H  | 4.55063  | -0.75113 | -0.29304 |
| H  | -4.18164 | 0.79483  | 1.83061  |
| H  | 0.11806  | 0.34207  | 3.38714  |
| H  | 3.24262  | -1.65827 | 3.64981  |
| H  | 1.56251  | 1.30975  | -1.12397 |
| H  | -2.43179 | 1.35668  | -2.64190 |
| H  | 5.83785  | -2.07583 | 0.96693  |
| H  | 1.11445  | 3.55419  | -0.70386 |
| H  | -5.44696 | -0.52237 | -3.73846 |
| H  | -0.15765 | 5.50423  | 2.96748  |
| H  | -6.16741 | -1.47200 | 2.26685  |
| H  | -5.11486 | -0.73334 | 3.46877  |
| H  | -4.42329 | -1.68671 | 2.14672  |
| H  | -3.33505 | 5.77353  | 1.56118  |
| H  | 2.47063  | -0.12958 | 5.24912  |
| H  | 0.92973  | 0.62129  | 5.66096  |
| H  | 2.03317  | 1.41361  | 4.51964  |
| H  | 3.77457  | -0.39950 | -2.33806 |
| H  | 2.61809  | 0.60502  | -3.19095 |
| H  | 2.06267  | -0.83246 | -2.30446 |
| H  | -1.85139 | 3.63368  | -1.92200 |
| H  | -7.36412 | -1.70070 | -3.46984 |
| H  | -0.58228 | 2.87138  | 3.26276  |
| H  | 3.37044  | 2.67310  | -0.12126 |
| H  | 3.45813  | 2.65517  | -1.89951 |
| H  | 4.57755  | 1.69381  | -0.94777 |
| H  | -2.28167 | 6.06928  | -0.88810 |
| H  | 6.37530  | -0.57313 | 2.85211  |
| H  | 7.02067  | -2.19358 | 3.11431  |
| H  | 5.57602  | -1.68006 | 3.98795  |
| H  | 0.88199  | 5.91922  | 0.52815  |
| H  | -6.97201 | -1.02490 | 0.19953  |
| H  | -7.21722 | 0.85839  | 1.71305  |
| H  | -6.14747 | 2.20853  | 1.33338  |
| H  | -6.19686 | 1.54434  | 2.97688  |
| H  | -3.56665 | 3.15046  | 2.06845  |
| H  | -0.11176 | -2.16297 | 3.33163  |
| H  | -0.35881 | -1.47993 | 4.94643  |
| H  | 1.15974  | -2.27931 | 4.54061  |
| H  | -6.33543 | -3.58815 | -2.19995 |
| H  | -8.08402 | -3.79497 | -2.39121 |
| H  | -7.41567 | -3.26504 | -0.84519 |
| H  | 4.31572  | -3.77162 | 3.01116  |
| H  | 5.79504  | -4.22710 | 2.16065  |
| H  | 4.29088  | -4.00743 | 1.25932  |
| H  | -2.18054 | -0.99677 | -3.49416 |
| H  | -1.85506 | 0.24461  | -4.71844 |
| H  | -3.37632 | -0.64313 | -4.73493 |
| H  | -4.72564 | 1.59436  | -4.61911 |

|   |          |          |          |
|---|----------|----------|----------|
| H | -3.18232 | 2.44360  | -4.68572 |
| H | -4.32065 | 2.76913  | -3.36629 |
| H | -8.98199 | -1.18894 | -0.92682 |
| H | -9.60847 | -1.72804 | -2.48058 |
| H | -8.91228 | -0.11035 | -2.32530 |

34

PPh<sub>3</sub> SCF done: -1036.310869

|   |          |          |          |
|---|----------|----------|----------|
| P | -0.13110 | -0.09434 | -1.02960 |
| C | -1.88011 | -0.38749 | -0.46869 |
| C | 1.22791  | -1.19948 | -0.40400 |
| C | 0.50606  | 1.48180  | -0.27501 |
| C | 2.54830  | -0.98881 | -0.81897 |
| C | 3.57121  | -1.82063 | -0.34809 |
| C | 3.27373  | -2.86312 | 0.53775  |
| C | 1.95335  | -3.07379 | 0.95272  |
| C | 0.93044  | -2.24197 | 0.48184  |
| H | 2.77969  | -0.17790 | -1.50803 |
| H | 4.59828  | -1.65676 | -0.67088 |
| H | 4.06941  | -3.51016 | 0.90403  |
| H | 1.72195  | -3.88470 | 1.64178  |
| H | -0.09664 | -2.40584 | 0.80463  |
| C | 1.80826  | 1.91441  | -0.55273 |
| C | 2.28785  | 3.10075  | 0.01524  |
| C | 1.46524  | 3.85449  | 0.86093  |
| C | 0.16304  | 3.42188  | 1.13865  |
| C | -0.31655 | 2.23554  | 0.57068  |
| H | 2.44814  | 1.32811  | -1.21055 |
| H | 3.30077  | 3.43726  | -0.20078 |
| H | 1.83828  | 4.77729  | 1.30273  |
| H | -0.47684 | 4.00818  | 1.79648  |
| H | -1.32947 | 1.89903  | 0.78671  |
| C | -2.91160 | 0.43762  | -0.93262 |
| C | -4.22807 | 0.21697  | -0.51043 |
| C | -4.51304 | -0.82878 | 0.37567  |
| C | -3.48155 | -1.65389 | 0.83959  |
| C | -2.16509 | -1.43324 | 0.41741  |
| H | -2.68994 | 1.25107  | -1.62188 |
| H | -5.03042 | 0.85879  | -0.87130 |
| H | -5.53706 | -1.00042 | 0.70407  |
| H | -3.70322 | -2.46734 | 1.52886  |
| H | -1.36273 | -2.07506 | 0.77828  |

50

isomer-1 of **8c**<sup>+</sup> SCF done: -2990.503494

|    |           |           |           |
|----|-----------|-----------|-----------|
| C  | 0.010600  | -0.006704 | -0.003776 |
| C  | -0.003318 | -0.002128 | 1.424949  |
| C  | 1.354033  | -0.010085 | 1.878082  |
| C  | 2.187576  | -0.016875 | 0.736225  |
| C  | 1.363270  | -0.018286 | -0.417933 |
| Fe | 0.952567  | 1.649670  | 0.733469  |
| C  | -0.055137 | 3.247683  | -0.044541 |
| C  | -0.069452 | 3.278401  | 1.383857  |

|   |           |           |           |
|---|-----------|-----------|-----------|
| C | 1.286284  | 3.352470  | 1.835839  |
| C | 2.119349  | 3.364223  | 0.693673  |
| C | 1.296136  | 3.303417  | -0.459665 |
| P | -1.506744 | 3.152031  | 2.429264  |
| P | -2.876684 | 1.588222  | 1.988337  |
| P | -1.445137 | 0.092319  | 2.467494  |
| C | -2.246918 | -1.561696 | 2.577143  |
| C | -1.156865 | -2.580262 | 2.929093  |
| C | -2.882498 | -1.904039 | 1.226326  |
| C | -3.307857 | -1.511916 | 3.681655  |
| C | -2.374512 | 4.774646  | 2.498071  |
| C | -3.433084 | 4.709768  | 3.604068  |
| C | -3.022746 | 5.057317  | 1.139484  |
| C | -1.326507 | 5.844731  | 2.823898  |
| H | 1.680074  | -0.000062 | 2.905893  |
| H | 3.265122  | 0.001230  | 0.743859  |
| H | 1.706847  | -0.000434 | -1.439269 |
| H | -0.855158 | 0.028846  | -0.645076 |
| H | 1.612037  | 3.381393  | 2.863382  |
| H | 3.196744  | 3.389792  | 0.701114  |
| H | 1.640578  | 3.273815  | -1.480436 |
| H | -0.918494 | 3.161161  | -0.684225 |
| H | -3.352408 | -2.886289 | 1.301123  |
| H | -3.654753 | -1.187676 | 0.941600  |
| H | -2.138851 | -1.954059 | 0.429596  |
| H | -3.751023 | -2.504152 | 3.783882  |
| H | -2.876933 | -1.240655 | 4.647534  |
| H | -4.107688 | -0.808127 | 3.451125  |
| H | -1.618072 | -3.565141 | 3.021447  |
| H | -0.389289 | -2.641955 | 2.157014  |
| H | -0.676199 | -2.350780 | 3.882332  |
| H | -3.531835 | 6.021424  | 1.190004  |
| H | -2.281357 | 5.117316  | 0.341340  |
| H | -3.765423 | 4.303577  | 0.873155  |
| H | -3.915885 | 5.685599  | 3.681755  |
| H | -4.203827 | 3.968816  | 3.391612  |
| H | -2.992023 | 4.480258  | 4.576174  |
| H | -1.827031 | 6.812242  | 2.891915  |
| H | -0.837419 | 5.658636  | 3.782297  |
| H | -0.561691 | 5.917997  | 2.050093  |
| H | -0.913675 | 3.023423  | 3.700332  |
| H | -0.858438 | 0.276358  | 3.734695  |

50

**8c<sup>+</sup>** SCF done: -2990.498569

|    |           |           |           |
|----|-----------|-----------|-----------|
| C  | 0.018141  | -0.003114 | -0.044319 |
| C  | -0.001507 | -0.014143 | 1.388869  |
| C  | 1.355477  | -0.024292 | 1.850812  |
| C  | 2.189815  | -0.025142 | 0.711718  |
| C  | 1.372185  | -0.015228 | -0.447496 |
| Fe | 0.957148  | 1.644051  | 0.721661  |
| C  | 0.018739  | 3.301344  | 1.476930  |
| C  | 1.408182  | 3.323248  | 1.816337  |
| C  | 2.159892  | 3.323757  | 0.618310  |

|   |           |           |           |
|---|-----------|-----------|-----------|
| C | 1.252218  | 3.302514  | -0.470821 |
| C | -0.064240 | 3.288169  | 0.049312  |
| P | -1.263433 | 3.240247  | 2.759636  |
| C | -2.218931 | 4.842784  | 2.556555  |
| C | -2.658755 | 5.174445  | 1.133062  |
| P | -1.435265 | 0.073685  | 2.412921  |
| C | -2.344733 | -1.518902 | 2.477834  |
| C | -1.351880 | -2.568727 | 2.993822  |
| P | -2.637690 | 1.770004  | 1.763685  |
| C | -3.436351 | 4.761548  | 3.483511  |
| C | -1.254608 | 5.924582  | 3.064768  |
| C | -3.521926 | -1.367122 | 3.447008  |
| C | -2.835024 | -1.883994 | 1.073754  |
| H | 1.805502  | 3.320633  | 2.818981  |
| H | 1.517838  | 3.273137  | -1.515199 |
| H | 1.675749  | -0.021423 | 2.880234  |
| H | -0.970845 | 3.249379  | -0.532614 |
| H | 3.267242  | -0.010422 | 0.724647  |
| H | 3.235248  | 3.316472  | 0.546039  |
| H | -0.841390 | 0.025297  | -0.694457 |
| H | -1.757187 | 6.893851  | 3.033893  |
| H | -0.944766 | 5.741467  | 4.095373  |
| H | -0.361511 | 5.994732  | 2.440859  |
| H | -3.919108 | 5.739711  | 3.533677  |
| H | -4.183804 | 4.053433  | 3.117893  |
| H | -3.156911 | 4.476178  | 4.499783  |
| H | -3.222109 | 6.110610  | 1.140547  |
| H | -1.806080 | 5.311273  | 0.468659  |
| H | -3.310598 | 4.407513  | 0.708318  |
| H | -3.387057 | -2.823534 | 1.131879  |
| H | -3.508247 | -1.129131 | 0.663428  |
| H | -2.005464 | -2.030478 | 0.381130  |
| H | -1.859109 | -3.534127 | 3.036459  |
| H | -0.489621 | -2.673533 | 2.333951  |
| H | -0.998003 | -2.336963 | 4.000359  |
| H | -3.998616 | -2.340768 | 3.571262  |
| H | -3.202326 | -1.029478 | 4.435309  |
| H | -4.278413 | -0.678669 | 3.068409  |
| H | 1.721582  | 0.008654  | -1.466587 |
| H | -3.519671 | 1.630115  | 2.863307  |
| H | -0.942598 | 0.295742  | 3.707583  |

82

tBu substituted counterpart of  $\mathbf{3}^+[\text{PPh}_3]$

SCF done: -4025.622958

|   |           |           |           |
|---|-----------|-----------|-----------|
| C | -3.376878 | -1.460729 | -1.387954 |
| C | -3.082428 | -1.181236 | -0.057462 |
| C | -3.924362 | -1.657826 | 0.947753  |
| C | -5.011659 | -2.448572 | 0.622044  |
| C | -5.279171 | -2.755151 | -0.704523 |
| C | -4.467684 | -2.251985 | -1.707899 |
| P | -1.753769 | -0.024029 | 0.365378  |
| C | -1.067896 | -0.460427 | 1.971856  |
| C | -1.121613 | -1.763650 | 2.463951  |
| C | -0.495804 | -2.079773 | 3.658171  |

|    |           |           |           |
|----|-----------|-----------|-----------|
| C  | 0.195800  | -1.106966 | 4.363473  |
| C  | 0.258299  | 0.189816  | 3.875778  |
| C  | -0.370147 | 0.511652  | 2.686635  |
| P  | -0.365132 | 0.095281  | -1.424621 |
| P  | 1.177910  | 1.656568  | -1.654639 |
| C  | 0.479622  | 3.387335  | -1.522800 |
| C  | -0.605017 | 3.543882  | -2.589827 |
| C  | 2.464332  | 1.603746  | -0.390883 |
| C  | 3.838110  | 1.503943  | -0.791892 |
| C  | 4.644537  | 1.508850  | 0.369143  |
| C  | 3.791414  | 1.613328  | 1.497382  |
| C  | 2.455735  | 1.679193  | 1.035061  |
| Fe | 3.306799  | -0.067825 | 0.397420  |
| C  | 3.436150  | -1.733720 | 1.611381  |
| C  | 4.378733  | -1.828369 | 0.555739  |
| C  | 3.672799  | -1.767710 | -0.667978 |
| C  | 2.274673  | -1.635109 | -0.378341 |
| C  | 2.144297  | -1.623679 | 1.043468  |
| P  | 1.097964  | -1.526375 | -1.744432 |
| C  | 0.284520  | -3.215260 | -1.764088 |
| C  | -0.444575 | -3.621194 | -0.488220 |
| C  | 1.457253  | -4.184354 | -1.995245 |
| C  | -0.647138 | -3.279791 | -2.975869 |
| C  | 1.674259  | 4.282373  | -1.900414 |
| C  | -0.029576 | 3.806827  | -0.146680 |
| C  | -2.669226 | 1.531890  | 0.502346  |
| C  | -2.938308 | 2.155062  | 1.717162  |
| C  | -3.701449 | 3.311536  | 1.745145  |
| C  | -4.208627 | 3.843215  | 0.570662  |
| C  | -3.975051 | 3.202456  | -0.637216 |
| C  | -3.216619 | 2.047478  | -0.671598 |
| H  | 1.227232  | -1.517281 | 1.591994  |
| H  | 3.664052  | -1.722537 | 2.665009  |
| H  | 5.448516  | -1.900216 | 0.665370  |
| H  | 4.104166  | -1.788839 | -1.656050 |
| H  | 1.583531  | 1.746267  | 1.656459  |
| H  | 4.104430  | 1.618470  | 2.528921  |
| H  | 5.718180  | 1.418028  | 0.393272  |
| H  | 4.182241  | 1.414102  | -1.809867 |
| H  | 1.053871  | -5.185451 | -2.163590 |
| H  | 2.046212  | -3.910799 | -2.872930 |
| H  | 2.122851  | -4.230979 | -1.133134 |
| H  | -1.061299 | -4.287162 | -3.062647 |
| H  | -1.482997 | -2.587809 | -2.889926 |
| H  | -0.112656 | -3.053808 | -3.899726 |
| H  | -0.750225 | -4.668868 | -0.557836 |
| H  | 0.197545  | -3.520718 | 0.387880  |
| H  | -1.347698 | -3.031791 | -0.339447 |
| H  | -0.951315 | 4.580037  | -2.605650 |
| H  | -0.223030 | 3.300636  | -3.582602 |
| H  | -1.467759 | 2.910309  | -2.393707 |
| H  | -0.353674 | 4.850436  | -0.182703 |
| H  | -0.880989 | 3.211757  | 0.174740  |
| H  | 0.756680  | 3.736068  | 0.605308  |

|   |           |           |           |
|---|-----------|-----------|-----------|
| H | 1.332706  | 5.319109  | -1.944275 |
| H | 2.474784  | 4.225478  | -1.161900 |
| H | 2.085007  | 4.023497  | -2.877949 |
| H | -1.636477 | -2.539313 | 1.916360  |
| H | -0.543053 | -3.093541 | 4.032786  |
| H | 0.686296  | -1.359399 | 5.294409  |
| H | 0.797756  | 0.952701  | 4.421372  |
| H | -0.320592 | 1.526480  | 2.314517  |
| H | -2.569339 | 1.746100  | 2.646524  |
| H | -3.903222 | 3.793948  | 2.692313  |
| H | -4.799968 | 4.749028  | 0.597540  |
| H | -4.387037 | 3.600560  | -1.554945 |
| H | -3.056053 | 1.544372  | -1.616753 |
| H | -3.743748 | -1.407950 | 1.984841  |
| H | -5.656599 | -2.820212 | 1.407227  |
| H | -6.129589 | -3.375591 | -0.955154 |
| H | -4.683064 | -2.470929 | -2.745327 |
| H | -2.760902 | -1.054893 | -2.178489 |

48

tBu substituted counterpart of **3<sup>+</sup>** SCF done: -2989.251876

|    |           |           |           |
|----|-----------|-----------|-----------|
| C  | -0.057654 | -0.027092 | -0.004900 |
| C  | -0.002547 | 0.006433  | 1.424235  |
| C  | 1.379818  | 0.048098  | 1.794372  |
| C  | 2.151003  | 0.024899  | 0.609439  |
| C  | 1.266769  | -0.021975 | -0.498434 |
| Fe | 0.943524  | -1.650551 | 0.747362  |
| C  | -0.271785 | -3.292329 | 0.712714  |
| C  | 0.458814  | -3.192568 | 1.945731  |
| C  | 1.858908  | -3.248881 | 1.634439  |
| C  | 1.975949  | -3.380727 | 0.233837  |
| C  | 0.673905  | -3.408453 | -0.328279 |
| P  | -0.238148 | -2.917736 | 3.541321  |
| C  | -0.148693 | -4.386754 | 4.654289  |
| C  | 1.329424  | -4.762803 | 4.826240  |
| P  | -1.505854 | -0.006057 | 2.424750  |
| C  | -1.579552 | 1.675917  | 3.255850  |
| C  | -2.830147 | 1.703111  | 4.139860  |
| P  | -1.250228 | -1.315320 | 4.141485  |
| C  | -0.908672 | -5.523325 | 3.954335  |
| C  | -0.781837 | -4.055592 | 6.004711  |
| C  | -1.745496 | 2.670615  | 2.097466  |
| C  | -0.339092 | 2.035242  | 4.071304  |
| H  | 2.670229  | -3.176395 | 2.340300  |
| H  | 2.901999  | -3.426671 | -0.315455 |
| H  | 0.441468  | -3.480001 | -1.378246 |
| H  | -1.344606 | -3.268655 | 0.609323  |
| H  | 1.765046  | 0.059520  | 2.801264  |
| H  | 3.227834  | 0.014326  | 0.558479  |
| H  | 1.554243  | -0.071299 | -1.535996 |
| H  | -0.958876 | -0.080462 | -0.594875 |
| H  | -0.822701 | -6.422063 | 4.568569  |
| H  | -1.968307 | -5.291095 | 3.841254  |
| H  | -0.490172 | -5.750895 | 2.972825  |



|   |           |           |          |
|---|-----------|-----------|----------|
| H | -0.708528 | -4.939781 | 6.640458 |
| H | -0.265550 | -3.238741 | 6.510855 |
| H | -1.837516 | -3.799153 | 5.911670 |
| H | 1.385373  | -5.644245 | 5.467836 |
| H | 1.798711  | -5.019410 | 3.876057 |
| H | 1.899926  | -3.964264 | 5.302830 |
| H | -2.967515 | 2.713156  | 4.531437 |
| H | -3.728733 | 1.436375  | 3.580970 |
| H | -2.746449 | 1.033927  | 4.999015 |
| H | -0.463100 | 3.034346  | 4.495734 |
| H | -0.181125 | 1.344452  | 4.903077 |
| H | 0.559864  | 2.051957  | 3.455274 |
| H | -1.859564 | 3.675711  | 2.508798 |
| H | -0.874143 | 2.678065  | 1.440542 |
| H | -2.631735 | 2.453346  | 1.498233 |

49

isomer-1 of 9 SCF done: -2990.102092

|    |           |           |           |
|----|-----------|-----------|-----------|
| C  | 0.000949  | -0.004954 | 0.019765  |
| C  | 0.015671  | -0.003720 | 1.435388  |
| C  | 1.370952  | -0.003903 | 1.858111  |
| C  | 2.192595  | 0.000577  | 0.703632  |
| C  | 1.350275  | -0.003373 | -0.451749 |
| Fe | 0.998116  | 1.658215  | 0.704765  |
| C  | 0.069924  | 3.362124  | 0.022973  |
| C  | 0.084545  | 3.357604  | 1.438590  |
| C  | 1.438685  | 3.301476  | 1.861243  |
| C  | 2.259485  | 3.265535  | 0.706716  |
| C  | 1.418065  | 3.306175  | -0.448613 |
| P  | 1.813772  | 3.249609  | -2.224386 |
| P  | 3.322029  | 1.613360  | -2.189354 |
| P  | 1.748057  | 0.040291  | -2.227422 |
| C  | 2.730141  | -1.548008 | -2.490490 |
| C  | 3.234012  | -1.517687 | -3.937319 |
| C  | 1.714737  | -2.685872 | -2.330407 |
| C  | 3.905081  | -1.782786 | -1.543638 |
| C  | 2.860043  | 4.796876  | -2.484547 |
| C  | 1.892040  | 5.975041  | -2.322370 |
| C  | 3.362341  | 4.748615  | -3.931436 |
| C  | 4.043550  | 4.981650  | -1.537286 |
| H  | 3.474997  | 1.611562  | -3.599880 |
| H  | -0.873105 | 0.016524  | -0.611480 |
| H  | -0.848647 | 0.018954  | 2.079183  |
| H  | 1.715907  | 0.022615  | 2.879303  |
| H  | 3.269272  | 0.043479  | 0.695329  |
| H  | -0.804261 | 3.377660  | -0.608266 |
| H  | -0.779993 | 3.369128  | 2.082385  |
| H  | 1.782237  | 3.258915  | 2.882366  |
| H  | 3.333502  | 3.178586  | 0.698276  |
| H  | 4.438690  | -2.690405 | -1.842206 |
| H  | 4.617202  | -0.955569 | -1.562281 |
| H  | 3.567813  | -1.923499 | -0.517036 |
| H  | 3.662009  | -2.489321 | -4.199041 |
| H  | 2.425875  | -1.304571 | -4.640500 |

|   |          |           |           |
|---|----------|-----------|-----------|
| H | 4.014162 | -0.766489 | -4.076963 |
| H | 2.201818 | -3.644549 | -2.530873 |
| H | 1.312114 | -2.720561 | -1.315911 |
| H | 0.879702 | -2.578762 | -3.025816 |
| H | 4.613869 | 5.867216  | -1.834208 |
| H | 3.712261 | 5.134178  | -0.510425 |
| H | 4.721226 | 4.126021  | -1.557448 |
| H | 3.829763 | 5.702396  | -4.191378 |
| H | 4.111102 | 3.966373  | -4.072469 |
| H | 2.546204 | 4.570044  | -4.634997 |
| H | 2.417953 | 6.913349  | -2.521092 |
| H | 1.053362 | 5.903459  | -3.017960 |
| H | 1.491115 | 6.024325  | -1.307805 |

49

isomer-2 of **9** SCF done: -2990.103707

|    |           |           |           |
|----|-----------|-----------|-----------|
| C  | 0.014211  | -0.003234 | 0.016369  |
| C  | 0.007111  | -0.004577 | 1.445299  |
| C  | 1.373550  | -0.004577 | 1.864771  |
| C  | 2.201381  | -0.000592 | 0.716320  |
| C  | 1.360513  | -0.004026 | -0.427108 |
| Fe | 0.969990  | 1.657125  | 0.722524  |
| C  | -0.053142 | 3.260290  | -0.020457 |
| C  | -0.060874 | 3.293619  | 1.408083  |
| C  | 1.304232  | 3.359430  | 1.826731  |
| C  | 2.131990  | 3.363634  | 0.678227  |
| C  | 1.292160  | 3.306568  | -0.464545 |
| P  | -1.425589 | 3.240425  | 2.611373  |
| P  | -2.714640 | 1.594798  | 1.928678  |
| P  | -1.359249 | 0.019429  | 2.647658  |
| C  | -2.310637 | -1.561693 | 2.270823  |
| C  | -1.333068 | -2.716490 | 2.515673  |
| C  | -2.881879 | -1.669954 | 0.858315  |
| C  | -3.451384 | -1.635583 | 3.291277  |
| C  | -2.441134 | 4.772157  | 2.199585  |
| C  | -3.584047 | 4.822256  | 3.219060  |
| C  | -3.016210 | 4.824789  | 0.785465  |
| C  | -1.511868 | 5.971399  | 2.417370  |
| H  | -2.432986 | 1.584949  | 0.539775  |
| H  | 1.702847  | 0.017030  | 2.891424  |
| H  | 3.279004  | 0.027110  | 0.710240  |
| H  | 1.687377  | 0.022425  | -1.454249 |
| H  | -0.854406 | 0.037106  | -0.619984 |
| H  | 1.633726  | 3.374611  | 2.853435  |
| H  | 3.209841  | 3.380254  | 0.672208  |
| H  | 1.620255  | 3.270417  | -1.490998 |
| H  | -0.919100 | 3.169809  | -0.655278 |
| H  | -3.442694 | -2.604560 | 0.759655  |
| H  | -3.568362 | -0.850863 | 0.633421  |
| H  | -2.094060 | -1.681324 | 0.105531  |
| H  | -3.987802 | -2.581474 | 3.174650  |
| H  | -3.074864 | -1.583286 | 4.314607  |
| H  | -4.169081 | -0.824717 | 3.151537  |
| H  | -1.857268 | -3.670239 | 2.407376  |

|   |           |           |          |
|---|-----------|-----------|----------|
| H | -0.508874 | -2.702463 | 1.800039 |
| H | -0.911295 | -2.676762 | 3.522368 |
| H | -3.614981 | 5.733066  | 0.666131 |
| H | -2.229456 | 4.851481  | 0.031958 |
| H | -3.668403 | 3.973275  | 0.579760 |
| H | -4.158846 | 5.742438  | 3.081489 |
| H | -4.267825 | 3.979648  | 3.098329 |
| H | -3.205791 | 4.808674  | 4.242997 |
| H | -2.074799 | 6.900105  | 2.287884 |
| H | -1.088937 | 5.971899  | 3.424361 |
| H | -0.687711 | 5.974994  | 1.701564 |

49

isomer-3 of 9 SCF done: -2990.0782739

|    |          |          |          |
|----|----------|----------|----------|
| C  | -1.85251 | 0.61390  | -0.64931 |
| C  | -2.14258 | -0.38508 | -1.63172 |
| C  | -3.13521 | -1.25450 | -1.12013 |
| C  | -3.47613 | -0.80968 | 0.18020  |
| C  | -2.69501 | 0.33849  | 0.46828  |
| Fe | -1.47333 | -1.27504 | 0.09676  |
| C  | 0.07969  | -1.36411 | 1.43428  |
| C  | 0.55639  | -1.65104 | 0.11687  |
| C  | -0.16057 | -2.80435 | -0.33103 |
| C  | -1.05786 | -3.20973 | 0.68301  |
| C  | -0.90339 | -2.32263 | 1.77939  |
| P  | 1.85363  | -0.91708 | -0.92225 |
| P  | 0.93695  | 0.89888  | -1.84475 |
| P  | -0.73896 | 2.01835  | -0.96902 |
| C  | -0.45035 | 2.93055  | 0.65085  |
| C  | -1.72999 | 3.74827  | 0.88641  |
| C  | -0.12052 | 2.11149  | 1.89071  |
| C  | 0.70053  | 3.90370  | 0.37089  |
| C  | 3.30671  | -0.50299 | 0.20039  |
| C  | 3.10162  | 0.54617  | 1.28329  |
| C  | 3.72019  | -1.83323 | 0.84210  |
| C  | 4.41991  | -0.03044 | -0.74367 |
| H  | -1.66562 | -0.47043 | -2.59520 |
| H  | -4.18537 | -1.27159 | 0.84779  |
| H  | -0.03822 | -3.26581 | -1.29811 |
| H  | -2.73331 | 0.88823  | 1.39233  |
| H  | -1.75314 | -4.03149 | 0.62412  |
| H  | -3.53350 | -2.12130 | -1.62215 |
| H  | 0.39514  | -0.54980 | 2.06033  |
| H  | -1.59865 | 4.37955  | 1.77008  |
| H  | -1.95032 | 4.39633  | 0.03659  |
| H  | -2.60055 | 3.11384  | 1.05715  |
| H  | 0.81322  | 4.58883  | 1.21535  |
| H  | 1.64842  | 3.37955  | 0.23821  |
| H  | 0.51468  | 4.50012  | -0.52499 |
| H  | 0.04834  | 2.78313  | 2.73836  |
| H  | -0.91801 | 1.42453  | 2.16382  |
| H  | 0.78566  | 1.53452  | 1.73946  |
| H  | 4.05078  | 0.74021  | 1.79236  |

|   |          |          |          |
|---|----------|----------|----------|
| H | 2.75310  | 1.49011  | 0.86309  |
| H | 2.39280  | 0.21361  | 2.04026  |
| H | 4.64964  | -1.69491 | 1.40201  |
| H | 2.95919  | -2.19757 | 1.53422  |
| H | 3.89250  | -2.60493 | 0.08905  |
| H | 5.34408  | 0.11471  | -0.17747 |
| H | 4.61377  | -0.75941 | -1.53220 |
| H | 4.17024  | 0.92230  | -1.21630 |
| H | -1.45826 | -2.35161 | 2.70345  |
| H | 1.97020  | 1.84913  | -1.68197 |

97

Fc'(TipP)<sub>2</sub> SCF done: -3503.396618

|    |           |           |           |
|----|-----------|-----------|-----------|
| C  | 1.489339  | 1.271962  | 1.541533  |
| C  | 0.440058  | 1.660260  | 0.682089  |
| C  | 0.649002  | 2.752898  | -0.182359 |
| C  | 1.823136  | 3.483828  | -0.091733 |
| C  | 2.833411  | 3.155456  | 0.797726  |
| C  | 2.650404  | 2.036293  | 1.587493  |
| P  | -1.108365 | 0.664792  | 0.886339  |
| C  | -2.679380 | 1.510114  | 0.437050  |
| C  | -3.314340 | 1.839697  | -0.810159 |
| C  | -4.706705 | 1.972234  | -0.592151 |
| C  | -4.965820 | 1.724573  | 0.779911  |
| C  | -3.729379 | 1.453123  | 1.411494  |
| Fe | -4.021326 | 0.084813  | -0.090754 |
| C  | -3.478873 | -1.710591 | 0.669055  |
| C  | -2.740457 | -1.422953 | -0.530931 |
| C  | -3.716074 | -1.299272 | -1.574209 |
| C  | -5.007454 | -1.489849 | -1.029079 |
| C  | -4.858769 | -1.753660 | 0.356281  |
| P  | -1.091650 | -0.680093 | -0.870501 |
| C  | 0.373906  | -1.769477 | -0.562056 |
| C  | 1.504686  | -1.445685 | -1.346367 |
| C  | 2.615192  | -2.277023 | -1.316392 |
| C  | 2.671912  | -3.410448 | -0.522417 |
| C  | 1.585654  | -3.676730 | 0.290211  |
| C  | 0.453600  | -2.871526 | 0.307024  |
| C  | 1.588842  | -0.204922 | -2.225399 |
| C  | 1.416126  | -0.565080 | -3.700090 |
| C  | -0.651313 | -3.216550 | 1.280521  |
| C  | -0.144711 | -3.560960 | 2.681715  |
| C  | 3.906586  | -4.282610 | -0.482116 |
| C  | 4.294808  | -4.801495 | -1.866430 |
| C  | -0.364755 | 3.161454  | -1.228087 |
| C  | 0.254343  | 3.474047  | -2.590967 |
| C  | 4.121010  | 3.946513  | 0.851432  |
| C  | 4.918215  | 3.774573  | -0.443798 |
| C  | 1.438317  | 0.033949  | 2.426709  |
| C  | 2.685490  | -0.836698 | 2.267594  |
| C  | -1.215945 | 4.333552  | -0.739029 |
| C  | 1.195549  | 0.412772  | 3.886826  |
| C  | 3.875981  | 5.424102  | 1.157347  |
| C  | -1.536710 | -4.336960 | 0.734433  |

|   |           |           |           |
|---|-----------|-----------|-----------|
| C | 5.071057  | -3.538965 | 0.176806  |
| C | 2.875593  | 0.584944  | -1.983041 |
| H | -3.489101 | -1.036779 | -2.595285 |
| H | -5.656841 | -1.933438 | 1.058580  |
| H | -5.932965 | 1.730927  | 1.255811  |
| H | -5.442095 | 2.200067  | -1.346981 |
| H | -2.002906 | 4.570128  | -1.458769 |
| H | 2.861498  | -1.078421 | 1.218610  |
| H | -1.005562 | 2.300397  | -1.383396 |
| H | 1.630339  | -4.535705 | 0.949715  |
| H | 0.767922  | 0.458859  | -1.959780 |
| H | 3.471591  | -2.021079 | -1.928264 |
| H | -1.248280 | -2.318087 | 1.392673  |
| H | 0.595764  | -0.578521 | 2.110668  |
| H | 3.668304  | -5.148217 | 0.142998  |
| H | -3.074947 | -1.820774 | 1.660430  |
| H | 3.447798  | 1.740501  | 2.259240  |
| H | -5.938321 | -1.433997 | -1.569675 |
| H | 0.852942  | 4.386744  | -2.576559 |
| H | -0.537884 | 3.619772  | -3.328330 |
| H | 0.888961  | 2.656641  | -2.935599 |
| H | 2.205608  | -1.244055 | -4.031574 |
| H | 1.457670  | 0.332342  | -4.321922 |
| H | 0.455137  | -1.054324 | -3.868779 |
| H | 0.402378  | -4.505175 | 2.705481  |
| H | -0.992112 | -3.661006 | 3.363256  |
| H | 0.509465  | -2.779356 | 3.070191  |
| H | -3.589697 | 1.181023  | 2.445654  |
| H | 4.719472  | 3.531978  | 1.667959  |
| H | -1.929385 | -4.088093 | -0.251384 |
| H | -2.383845 | -4.521909 | 1.398860  |
| H | -0.962941 | -5.263155 | 0.648172  |
| H | 3.466469  | -5.337026 | -2.332525 |
| H | 5.146760  | -5.480737 | -1.795280 |
| H | 4.579868  | -3.982061 | -2.529977 |
| H | 1.961125  | 4.329313  | -0.754837 |
| H | -0.593776 | 5.222778  | -0.609628 |
| H | -1.689478 | 4.108788  | 0.216576  |
| H | -2.837608 | 1.919600  | -1.771643 |
| H | 3.000908  | 0.810172  | -0.923208 |
| H | 2.840040  | 1.533233  | -2.522586 |
| H | 3.761132  | 0.047920  | -2.329116 |
| H | 5.110711  | 2.720183  | -0.648324 |
| H | 5.876190  | 4.295001  | -0.380447 |
| H | 4.368807  | 4.183841  | -1.294955 |
| H | 5.356180  | -2.665155 | -0.413974 |
| H | 5.945605  | -4.187320 | 0.263076  |
| H | 4.798781  | -3.191281 | 1.174696  |
| H | 2.556132  | -1.775907 | 2.809014  |
| H | 3.580148  | -0.352980 | 2.664762  |
| H | 2.003233  | 1.042885  | 4.267162  |
| H | 1.141320  | -0.481988 | 4.511475  |
| H | 0.258232  | 0.961840  | 3.993080  |
| H | 3.305990  | 5.902969  | 0.358006  |

|   |          |          |          |
|---|----------|----------|----------|
| H | 4.823777 | 5.957651 | 1.253790 |
| H | 3.316997 | 5.546038 | 2.086243 |

132

6<sup>+</sup> SCF done: -4880.934862

|    |           |           |           |
|----|-----------|-----------|-----------|
| C  | -0.903868 | -3.442281 | -1.968696 |
| C  | -1.358465 | -2.753978 | -0.846408 |
| C  | -2.727779 | -2.637507 | -0.619907 |
| C  | -3.629645 | -3.184379 | -1.512988 |
| C  | -3.174413 | -3.854735 | -2.637365 |
| C  | -1.812944 | -3.988388 | -2.859462 |
| P  | -0.213187 | -1.955470 | 0.298595  |
| C  | 1.406034  | -2.723106 | 0.115378  |
| C  | 2.139006  | -2.518341 | -1.054364 |
| C  | 3.355814  | -3.147272 | -1.227413 |
| C  | 3.855915  | -3.975306 | -0.234623 |
| C  | 3.139150  | -4.169665 | 0.934669  |
| C  | 1.916088  | -3.544449 | 1.115820  |
| P  | 0.073749  | 0.119061  | -0.375238 |
| P  | 1.772192  | 0.616009  | 1.023763  |
| C  | 3.281837  | 0.342776  | 0.002303  |
| C  | 4.327873  | -0.326699 | 0.689615  |
| C  | 5.465740  | -0.691260 | -0.009581 |
| C  | 5.616833  | -0.445038 | -1.366235 |
| C  | 4.602547  | 0.233873  | -2.012423 |
| C  | 3.450389  | 0.661173  | -1.359209 |
| C  | 4.276531  | -0.594808 | 2.188573  |
| C  | 4.550436  | 0.698747  | 2.965455  |
| C  | 6.869188  | -0.867796 | -2.101294 |
| C  | 8.091660  | -0.106062 | -1.584598 |
| C  | 2.488527  | 1.508253  | -2.177496 |
| C  | 1.822620  | 0.739577  | -3.321167 |
| C  | 1.668915  | 2.405306  | 1.297657  |
| C  | 0.995411  | 2.975514  | 2.425830  |
| C  | 1.249881  | 4.365796  | 2.444095  |
| C  | 2.092401  | 4.671933  | 1.344908  |
| C  | 2.353796  | 3.473913  | 0.642751  |
| Fe | 0.326642  | 3.816564  | 0.683102  |
| C  | -0.564087 | 3.372548  | -1.104893 |
| C  | -1.319168 | 2.850995  | -0.007577 |
| C  | -1.703530 | 3.970644  | 0.798195  |
| C  | -1.190567 | 5.147403  | 0.206183  |
| C  | -0.482430 | 4.777439  | -0.964180 |
| P  | -1.612738 | 1.184547  | 0.639535  |
| C  | -3.151034 | 0.584598  | -0.172931 |
| C  | -3.430333 | 0.629892  | -1.551364 |
| C  | -4.702715 | 0.288490  | -1.992505 |
| C  | -5.710611 | -0.101268 | -1.130270 |
| C  | -5.407104 | -0.183614 | 0.220626  |
| C  | -4.156482 | 0.142985  | 0.721705  |
| C  | -2.423741 | 1.026852  | -2.612599 |
| C  | -2.176775 | -0.107733 | -3.608022 |
| C  | -3.951190 | 0.038603  | 2.227441  |
| C  | -4.566244 | -1.219600 | 2.839463  |

|   |           |           |           |
|---|-----------|-----------|-----------|
| C | -7.100846 | -0.409020 | -1.640645 |
| C | -7.492713 | -1.866029 | -1.392842 |
| C | 5.223561  | -1.690193 | 2.671752  |
| C | 7.093488  | -2.378735 | -2.026176 |
| C | 3.187994  | 2.745494  | -2.758308 |
| C | -4.473166 | 1.297467  | 2.921612  |
| C | -8.130795 | 0.547837  | -1.036201 |
| C | -2.834344 | 2.318001  | -3.320964 |
| C | -0.815377 | -2.280523 | 1.965810  |
| C | -1.453537 | -3.493093 | 2.231004  |
| C | -1.861338 | -3.790971 | 3.518780  |
| C | -1.639958 | -2.884364 | 4.544946  |
| C | -1.003087 | -1.681521 | 4.284889  |
| C | -0.584440 | -1.378132 | 3.000215  |
| H | 4.723837  | 0.465514  | -3.064652 |
| H | -2.881857 | -0.016430 | 2.421522  |
| H | 3.262492  | -0.919592 | 2.430413  |
| H | 6.265068  | -1.193777 | 0.516925  |
| H | 1.711541  | 1.870458  | -1.507660 |
| H | -1.473092 | 1.212487  | -2.125463 |
| H | 6.732092  | -0.603244 | -3.153465 |
| H | 2.970065  | 3.381293  | -0.231914 |
| H | -4.919525 | 0.337691  | -3.053340 |
| H | 0.851534  | 5.071998  | 3.154314  |
| H | -5.657030 | -1.198255 | 2.832825  |
| H | -4.251983 | -1.309054 | 3.880423  |
| H | -4.241505 | -2.121564 | 2.317044  |
| H | -1.293496 | 6.147106  | 0.595443  |
| H | 5.552630  | 1.069078  | 2.738207  |
| H | 4.490726  | 0.517932  | 4.040182  |
| H | 3.842632  | 1.490957  | 2.718259  |
| H | 2.569009  | 0.357114  | -4.019839 |
| H | 1.158070  | 1.401894  | -3.881371 |
| H | 1.222993  | -0.095922 | -2.963873 |
| H | -0.119632 | 2.804812  | -1.904888 |
| H | -7.090595 | -0.246790 | -2.721788 |
| H | 0.374722  | 2.433493  | 3.121844  |
| H | 3.824288  | 3.246088  | -2.029030 |
| H | 2.445490  | 3.461976  | -3.114969 |
| H | 3.820603  | 2.479266  | -3.606413 |
| H | 0.045249  | 5.446336  | -1.624559 |
| H | 7.941636  | 0.972042  | -1.653366 |
| H | 8.977907  | -0.366406 | -2.165322 |
| H | 8.292893  | -0.351522 | -0.539563 |
| H | 2.456210  | 5.650600  | 1.077318  |
| H | -6.179688 | -0.497873 | 0.910763  |
| H | -5.545065 | 1.417835  | 2.750444  |
| H | -3.973446 | 2.190457  | 2.541469  |
| H | -4.304153 | 1.242965  | 3.998690  |
| H | -2.252071 | 3.913837  | 1.724978  |
| H | 5.122738  | -2.602849 | 2.084450  |
| H | 4.997758  | -1.929957 | 3.711746  |
| H | 6.268030  | -1.373547 | 2.638078  |
| H | -6.814651 | -2.551515 | -1.904031 |

|   |           |           |           |
|---|-----------|-----------|-----------|
| H | -8.500471 | -2.057901 | -1.764114 |
| H | -7.479787 | -2.104697 | -0.327078 |
| H | 7.232603  | -2.706801 | -0.993683 |
| H | 7.986796  | -2.659493 | -2.585879 |
| H | 6.249076  | -2.928329 | -2.445578 |
| H | -1.866691 | -1.019471 | -3.095187 |
| H | -1.388666 | 0.173851  | -4.309110 |
| H | -3.070496 | -0.339594 | -4.189686 |
| H | -3.759344 | 2.185183  | -3.885011 |
| H | -2.058395 | 2.626945  | -4.024523 |
| H | -2.986173 | 3.126561  | -2.605225 |
| H | -8.214438 | 0.405412  | 0.043389  |
| H | -9.115421 | 0.372194  | -1.471974 |
| H | -7.856554 | 1.587641  | -1.217954 |
| H | 1.366294  | -3.698303 | 2.034508  |
| H | 3.532640  | -4.807363 | 1.715032  |
| H | 4.814493  | -4.459438 | -0.369581 |
| H | 3.920588  | -2.972325 | -2.132306 |
| H | 1.771500  | -1.857029 | -1.826979 |
| H | -1.634051 | -4.203793 | 1.435241  |
| H | -2.356519 | -4.731642 | 3.719490  |
| H | -1.965206 | -3.117880 | 5.550462  |
| H | -0.827296 | -0.974203 | 5.084472  |
| H | -0.074274 | -0.445712 | 2.806589  |
| H | 0.153499  | -3.569278 | -2.150683 |
| H | -1.452547 | -4.523417 | -3.727926 |
| H | -3.880833 | -4.280826 | -3.337798 |
| H | -4.688528 | -3.079545 | -1.321822 |
| H | -3.100647 | -2.120026 | 0.250814  |

38

1,6-Diphosphatricyclo[4.4.4.0]tetradecanedium HF=-1153.9761582

|   |           |           |           |
|---|-----------|-----------|-----------|
| C | -0.094190 | 1.739127  | -1.563622 |
| P | 0.000399  | 0.000297  | -1.089343 |
| C | -1.457796 | -0.950890 | -1.565006 |
| C | -1.655671 | -2.238246 | -0.746740 |
| C | -1.913265 | -2.023447 | 0.744583  |
| C | -0.681183 | -1.603123 | 1.563776  |
| P | -0.000297 | -0.000438 | 1.089305  |
| C | 1.727810  | 0.210918  | 1.565089  |
| C | 2.708334  | -0.645562 | 0.746070  |
| C | 2.766767  | -0.314158 | -0.744968 |
| C | 1.553773  | -0.786243 | -1.564464 |
| C | -1.110379 | 2.553629  | -0.745226 |
| C | -0.796099 | 2.668102  | 0.746268  |
| C | -1.048247 | 1.390133  | 1.564283  |
| H | -0.340173 | 1.756939  | -2.629628 |
| H | 0.911730  | 2.156530  | -1.463290 |
| H | 1.787753  | -0.029685 | 2.630784  |
| H | 1.962366  | 1.274577  | 1.466480  |
| H | -0.871511 | 1.561887  | 2.630333  |
| H | -2.086456 | 1.061197  | 1.463972  |
| H | -0.919455 | -1.535687 | 2.629545  |



|   |           |           |           |
|---|-----------|-----------|-----------|
| H | 0.122722  | -2.337987 | 1.464466  |
| H | 1.692410  | -0.580420 | -2.630113 |
| H | 1.412585  | -1.866267 | -1.465828 |
| H | -1.349290 | -1.172799 | -2.630923 |
| H | -2.322288 | -0.288393 | -1.465431 |
| H | 3.696058  | -0.479865 | 1.176407  |
| H | 2.498423  | -1.708930 | 0.889325  |
| H | 3.639451  | -0.805969 | -1.174828 |
| H | 2.931177  | 0.757188  | -0.888303 |
| H | -2.518089 | -2.747473 | -1.177041 |
| H | -0.810172 | -2.916318 | -0.890779 |
| H | -2.263428 | -2.962164 | 1.174051  |
| H | -2.729328 | -1.310257 | 0.888683  |
| H | -1.119972 | 3.555443  | -1.174788 |
| H | -2.120302 | 2.160589  | -0.889951 |
| H | -1.434311 | 3.440201  | 1.176149  |
| H | 0.229453  | 3.018337  | 0.891015  |

39

1,6-Diphosphatricyclo[4.4.4.0]tetradecanedium+F HF=-1254.2091912

|   |           |           |           |
|---|-----------|-----------|-----------|
| C | 1.221742  | -0.357549 | -1.790425 |
| P | 1.294020  | -0.009515 | 0.010704  |
| F | 2.940531  | -0.021892 | 0.024065  |
| C | 0.458956  | -1.607923 | -2.259375 |
| C | -1.059251 | -1.472402 | -2.352513 |
| C | -1.768275 | -1.364932 | -1.001251 |
| P | -1.117494 | 0.008309  | -0.009255 |
| C | -1.749241 | 1.556534  | -0.714443 |
| C | -1.046425 | 2.777557  | -0.118319 |
| C | 0.474492  | 2.758865  | -0.254096 |
| C | 1.217798  | 1.724839  | 0.608146  |
| C | -1.781826 | -0.152544 | 1.671834  |
| C | -1.097968 | -1.282133 | 2.444187  |
| C | 0.422151  | -1.160935 | 2.524826  |
| C | 1.189700  | -1.393424 | 1.212615  |
| H | -1.307956 | -0.608853 | -2.975887 |
| H | 2.255245  | 2.029754  | 0.730884  |
| H | 0.779528  | 1.695022  | 1.610132  |
| H | -2.862932 | -0.301439 | 1.618959  |
| H | -1.614096 | 0.801947  | 2.177430  |
| H | -2.830555 | 1.605101  | -0.565563 |
| H | -1.575857 | 1.513969  | -1.792831 |
| H | -2.846792 | -1.240691 | -1.124232 |
| H | -1.614924 | -2.280360 | -0.423925 |
| H | 2.222145  | -1.655961 | 1.435024  |
| H | 0.758405  | -2.244780 | 0.677735  |
| H | 2.259974  | -0.421670 | -2.110250 |
| H | 0.801467  | 0.532717  | -2.267616 |
| H | -1.503726 | -1.292643 | 3.456629  |
| H | -1.361303 | -2.248861 | 2.005693  |
| H | 0.781022  | -1.915292 | 3.226079  |
| H | 0.699094  | -0.199403 | 2.965570  |
| H | 0.835798  | -1.839446 | -3.256355 |

|   |           |           |           |
|---|-----------|-----------|-----------|
| H | 0.721572  | -2.471136 | -1.641806 |
| H | -1.458279 | -2.342940 | -2.874746 |
| H | 0.849422  | 3.736650  | 0.050810  |
| H | 0.756171  | 2.654560  | -1.305432 |
| H | -1.432774 | 3.666756  | -0.618169 |
| H | -1.314434 | 2.886399  | 0.936429  |

32

Ligand-Stabilized Trimethylphosphane Dication HF= -842.8605961

|   |           |           |           |
|---|-----------|-----------|-----------|
| C | 1.253930  | -1.197588 | 0.000013  |
| C | -0.089896 | -1.147875 | -0.000011 |
| N | -0.790802 | 0.040727  | -0.000031 |
| C | -0.065897 | 1.212316  | 0.000039  |
| C | 1.280158  | 1.227902  | 0.000064  |
| C | 2.034429  | 0.007748  | 0.000062  |
| P | -2.509070 | -0.005300 | -0.000008 |
| C | -3.033562 | -0.862540 | -1.470793 |
| N | 3.346045  | -0.007467 | 0.000008  |
| C | 4.084744  | -1.275792 | 0.000030  |
| C | -3.120789 | 1.665995  | -0.000599 |
| C | -3.033579 | -0.861488 | 1.471376  |
| C | 4.112562  | 1.244179  | -0.000096 |
| H | -2.665024 | -1.887632 | 1.481640  |
| H | -2.677811 | -0.333805 | 2.357319  |
| H | -4.126064 | -0.886423 | 1.482099  |
| H | -0.625329 | 2.135198  | 0.000057  |
| H | 1.769259  | 2.189409  | 0.000086  |
| H | 1.722109  | -2.169549 | -0.000023 |
| H | -0.673580 | -2.058608 | -0.000033 |
| H | -2.677591 | -0.335633 | -2.357113 |
| H | -2.665258 | -1.888779 | -1.480201 |
| H | -4.126053 | -0.887238 | -1.481610 |
| H | -2.814922 | 2.203190  | -0.898842 |
| H | -4.211919 | 1.593801  | -0.000789 |
| H | -2.815274 | 2.203678  | 0.897473  |
| H | 5.147811  | -1.063227 | 0.000192  |
| H | 3.851275  | -1.855635 | 0.893444  |
| H | 3.851525  | -1.855521 | -0.893526 |
| H | 5.170723  | 1.008416  | -0.000466 |
| H | 3.891155  | 1.829043  | -0.893328 |
| H | 3.891707  | 1.828856  | 0.893399  |

32

Ligand-Stabilized Trimethylphosphane Dication HF= -943.096735

|   |           |           |           |
|---|-----------|-----------|-----------|
| C | -0.005896 | -0.024441 | 0.025807  |
| N | -0.018288 | -0.033256 | 1.369723  |
| C | 1.183139  | -0.024150 | 1.972235  |
| C | 2.376163  | -0.045292 | 1.307991  |
| C | 2.399380  | -0.069587 | -0.106965 |
| C | 1.129954  | -0.045627 | -0.732245 |
| N | 3.540820  | -0.104899 | -0.804188 |
| C | 4.821541  | -0.115085 | -0.114935 |
| C | 3.512142  | -0.116509 | -2.258301 |
| P | -1.821880 | 0.280747  | 2.479491  |

|   |           |           |           |
|---|-----------|-----------|-----------|
| F | -3.169832 | 0.638201  | 3.313861  |
| C | -2.712990 | -0.677131 | 1.237392  |
| C | -1.398916 | 2.025884  | 2.237907  |
| C | -1.127796 | -0.708853 | 3.818944  |
| H | -3.102711 | -0.014095 | 0.464545  |
| H | -2.104784 | -1.456493 | 0.789882  |
| H | -3.564515 | -1.121245 | 1.749141  |
| H | 1.186398  | 0.005480  | 3.053284  |
| H | 3.285555  | -0.041303 | 1.887993  |
| H | 1.029092  | -0.041846 | -1.806130 |
| H | -0.965982 | 0.004892  | -0.470835 |
| H | -0.424718 | 2.231990  | 2.678500  |
| H | -1.336841 | 2.244884  | 1.173173  |
| H | -2.157238 | 2.648916  | 2.703474  |
| H | -0.624619 | -0.061112 | 4.537351  |
| H | -1.974232 | -1.166622 | 4.327295  |
| H | -0.448139 | -1.478535 | 3.468324  |
| H | 4.529375  | -0.166023 | -2.633495 |
| H | 2.970372  | -0.986702 | -2.635308 |
| H | 3.048673  | 0.790350  | -2.653786 |
| H | 5.619756  | -0.162687 | -0.848809 |
| H | 4.960460  | 0.791559  | 0.478594  |
| H | 4.911119  | -0.985629 | 0.538548  |

49

threecoordinate phosphorus dications isoelectronic to silylium cation scf done: -1419.768829

|   |           |           |           |
|---|-----------|-----------|-----------|
| N | 0.000664  | 0.001627  | 0.000190  |
| C | -0.000139 | -0.000456 | 1.343437  |
| N | 1.277977  | -0.002098 | 1.748741  |
| C | 2.100741  | 0.017789  | 0.642195  |
| C | 1.307431  | 0.017833  | -0.444865 |
| N | -1.055559 | -0.096611 | 2.174767  |
| P | -2.284132 | 0.817741  | 2.376060  |
| N | -2.482668 | 2.054470  | 1.472313  |
| C | -3.430540 | 3.011260  | 1.465407  |
| N | -3.173182 | 4.324269  | 1.553155  |
| C | -4.354624 | 5.023739  | 1.424435  |
| C | -5.335448 | 4.120336  | 1.242951  |
| N | -4.751232 | 2.869576  | 1.265405  |
| C | -1.859903 | 4.908966  | 1.770748  |
| C | -5.444707 | 1.609902  | 1.058428  |
| C | 1.718442  | -0.003447 | 3.134354  |
| C | -1.178910 | -0.051294 | -0.846111 |
| N | -3.333416 | 0.474385  | 3.456315  |
| C | -3.376012 | -0.507665 | 4.377169  |
| N | -3.405601 | -1.835128 | 4.174095  |
| C | -3.547219 | -2.469456 | 5.392197  |
| C | -3.610985 | -1.512971 | 6.336688  |
| N | -3.511933 | -0.296772 | 5.694319  |
| C | -3.346046 | -2.494161 | 2.880809  |
| C | -3.529850 | 1.007085  | 6.337413  |
| H | 1.551942  | 0.019145  | -1.492208 |
| H | 3.172806  | 0.023567  | 0.729067  |
| H | -0.871625 | -0.337703 | -1.848088 |

|   |           |           |           |
|---|-----------|-----------|-----------|
| H | -1.867425 | -0.804054 | -0.464457 |
| H | -1.669132 | 0.920149  | -0.875765 |
| H | 2.659582  | -0.543230 | 3.201704  |
| H | 1.858630  | 1.016738  | 3.489655  |
| H | 0.970320  | -0.505783 | 3.741975  |
| H | -6.392098 | 4.252301  | 1.091961  |
| H | -4.388555 | 6.097930  | 1.467416  |
| H | -6.423727 | 1.820725  | 0.637179  |
| H | -4.885849 | 0.998033  | 0.351546  |
| H | -5.557447 | 1.078944  | 2.001961  |
| H | -1.816872 | 5.870381  | 1.265283  |
| H | -1.678262 | 5.049921  | 2.835550  |
| H | -1.105558 | 4.247634  | 1.352640  |
| H | -3.597959 | -3.540684 | 5.473536  |
| H | -3.723708 | -1.586357 | 7.403832  |
| H | -3.685835 | -3.519169 | 3.000385  |
| H | -4.009877 | -1.986393 | 2.182322  |
| H | -2.327242 | -2.487254 | 2.497557  |
| H | -4.169759 | 0.955739  | 7.214632  |
| H | -2.523645 | 1.296376  | 6.638285  |
| H | -3.930802 | 1.738705  | 5.640850  |

50

threecoordinate phosphorus dications isoelectronic to silylium cation+F scf done: -1520.0063

|   |           |           |           |
|---|-----------|-----------|-----------|
| N | 3.260399  | -0.841168 | -1.028078 |
| C | 2.359564  | -0.930172 | -0.016345 |
| N | 2.577945  | -2.132381 | 0.574259  |
| C | 3.609297  | -2.785131 | -0.076074 |
| C | 4.035533  | -1.983464 | -1.065236 |
| N | 1.524773  | 0.031160  | 0.299528  |
| P | -0.000008 | -0.000831 | 0.731604  |
| F | 0.001610  | -0.002894 | 2.320638  |
| C | 1.903074  | -2.614083 | 1.763875  |
| C | 3.388581  | 0.296836  | -1.910412 |
| N | -0.790267 | 1.304959  | 0.304104  |
| C | -0.374010 | 2.507447  | -0.014241 |
| N | -0.901292 | 3.242438  | -1.026465 |
| C | -0.297856 | 4.484034  | -1.065703 |
| C | 0.610498  | 4.515565  | -0.077443 |
| N | 0.559636  | 3.296836  | 0.574296  |
| C | -1.951904 | 2.784281  | -1.907592 |
| C | 1.315532  | 2.952741  | 1.762888  |
| N | -0.736024 | -1.336985 | 0.300316  |
| C | -1.986356 | -1.577481 | -0.015227 |
| N | -3.136136 | -1.163468 | 0.575153  |
| C | -4.217924 | -1.728076 | -0.075595 |
| C | -3.738005 | -2.498925 | -1.064580 |
| N | -2.361067 | -2.401064 | -1.027318 |
| C | -3.215248 | -0.336480 | 1.763607  |
| C | -1.440822 | -3.082374 | -1.909971 |
| H | -5.229398 | -1.530721 | 0.230335  |
| H | -4.247606 | -3.105982 | -1.790878 |
| H | -4.223435 | -0.408130 | 2.163802  |

|   |           |           |           |
|---|-----------|-----------|-----------|
| H | -2.510498 | -0.699967 | 2.509743  |
| H | -2.979925 | 0.699860  | 1.528572  |
| H | -1.716305 | -2.897758 | -2.947470 |
| H | -0.443931 | -2.692550 | -1.721273 |
| H | -1.450485 | -4.155344 | -1.717528 |
| H | 1.286939  | 5.293485  | 0.227329  |
| H | -0.569766 | 5.228218  | -1.792333 |
| H | 1.758825  | 3.861753  | 2.161496  |
| H | 0.648177  | 2.526092  | 2.509976  |
| H | 2.094260  | 2.229367  | 1.528386  |
| H | -1.652720 | 2.922636  | -2.945751 |
| H | -2.116485 | 1.727832  | -1.711871 |
| H | -2.874491 | 3.333694  | -1.719608 |
| H | 3.946009  | -3.758967 | 0.230324  |
| H | 4.816498  | -2.120002 | -1.791289 |
| H | 2.462637  | -3.459577 | 2.155905  |
| H | 1.878255  | -1.826023 | 2.514873  |
| H | 0.883417  | -2.916397 | 1.532561  |
| H | 3.368470  | -0.034024 | -2.947957 |
| H | 2.550604  | 0.963128  | -1.722564 |
| H | 4.321083  | 0.827288  | -1.716840 |

XYZ coordinates of the investigated systems and their total energies, which were obtained after the geometry optimization at  $\omega$ B97X-D/def2-SVP

103

Tip\_triphosponiumcation+alcl4 scf done: -5925.459141

|    |           |           |           |
|----|-----------|-----------|-----------|
| C  | -1.422801 | -1.802332 | 2.911846  |
| C  | -1.532623 | -0.690045 | 2.000660  |
| C  | -1.684852 | 0.510213  | 2.774515  |
| C  | -1.657459 | 0.136487  | 4.142159  |
| C  | -1.500713 | -1.277691 | 4.227977  |
| P  | -1.478663 | -0.781227 | 0.222627  |
| P  | 0.152841  | -1.243157 | -0.863767 |
| P  | 1.786248  | -1.603531 | 0.469255  |
| C  | 1.735470  | -0.727996 | 2.051593  |
| C  | 1.591056  | 0.663681  | 2.377331  |
| C  | 1.613678  | 0.781765  | 3.790359  |
| C  | 1.775870  | -0.516515 | 4.354905  |
| C  | 1.854492  | -1.451847 | 3.289682  |
| Fe | 0.077532  | -0.454292 | 3.186142  |
| C  | -3.050355 | -1.191237 | -0.567803 |
| C  | -3.505831 | -2.529081 | -0.588735 |
| C  | -4.724732 | -2.788312 | -1.211094 |
| C  | -5.490374 | -1.777414 | -1.798934 |
| C  | -5.014081 | -0.468225 | -1.749478 |
| C  | -3.801423 | -0.143256 | -1.139271 |
| C  | -2.738592 | -3.684156 | 0.035268  |
| C  | -3.540342 | -4.356382 | 1.153729  |
| C  | -3.294371 | 1.285143  | -1.143622 |
| C  | -4.381773 | 2.328993  | -0.890214 |
| C  | -6.813460 | -2.097306 | -2.468946 |

|    |           |           |           |
|----|-----------|-----------|-----------|
| C  | -7.830189 | -2.647338 | -1.462742 |
| C  | 3.281418  | -1.138591 | -0.487237 |
| C  | 3.476958  | 0.129441  | -1.080205 |
| C  | 4.642687  | 0.339002  | -1.825376 |
| C  | 5.614730  | -0.640429 | -1.988401 |
| C  | 5.407975  | -1.879226 | -1.376678 |
| C  | 4.264488  | -2.157249 | -0.632792 |
| C  | 2.516717  | 1.299873  | -0.954696 |
| C  | 3.182469  | 2.480865  | -0.238690 |
| C  | 6.867412  | -0.370570 | -2.800389 |
| C  | 6.961147  | -1.301601 | -4.013807 |
| C  | 4.152141  | -3.509669 | 0.063589  |
| C  | 4.789185  | -4.666268 | -0.708900 |
| C  | 1.932098  | 1.718324  | -2.307714 |
| C  | 8.126319  | -0.450147 | -1.930208 |
| C  | 4.726948  | -3.414098 | 1.483591  |
| C  | -2.519656 | 1.573791  | -2.433698 |
| C  | -6.626050 | -3.045352 | -3.658109 |
| C  | -2.273282 | -4.683265 | -1.028055 |
| Cl | -0.446428 | 2.680163  | 0.398720  |
| Al | -0.608837 | 4.809869  | -0.172672 |
| Cl | -0.496335 | 4.880329  | -2.321340 |
| Cl | -2.516071 | 5.478059  | 0.551027  |
| Cl | 1.050569  | 5.799723  | 0.753075  |
| H  | 4.796192  | 1.314642  | -2.293601 |
| H  | -1.826921 | -3.275810 | 0.496668  |
| H  | 3.080830  | -3.745626 | 0.158101  |
| H  | 6.169456  | -2.653439 | -1.485689 |
| H  | 1.665134  | 0.994072  | -0.333114 |
| H  | -2.570072 | 1.384697  | -0.315726 |
| H  | 6.788620  | 0.662165  | -3.178056 |
| H  | 1.427560  | 1.485439  | 1.683704  |
| H  | -5.607379 | 0.329494  | -2.201802 |
| H  | 1.810057  | -0.754810 | 5.416142  |
| H  | -3.127923 | -5.152210 | -1.539870 |
| H  | -1.674536 | -5.485294 | -0.570178 |
| H  | -1.656394 | -4.186490 | -1.792099 |
| H  | -1.424817 | -1.857881 | 5.145507  |
| H  | 5.801807  | -3.175926 | 1.449670  |
| H  | 4.603954  | -4.366638 | 2.022291  |
| H  | 4.234540  | -2.622033 | 2.068069  |
| H  | 2.712892  | 2.092686  | -2.987937 |
| H  | 1.193994  | 2.521653  | -2.169818 |
| H  | 1.432341  | 0.872611  | -2.806840 |
| H  | -1.747377 | 1.519689  | 2.369666  |
| H  | -7.212573 | -1.147161 | -2.859987 |
| H  | 1.963129  | -2.531292 | 3.383736  |
| H  | 3.634545  | 2.165232  | 0.714035  |
| H  | 2.445178  | 3.268389  | -0.025949 |
| H  | 3.977690  | 2.928071  | -0.855000 |
| H  | -1.717697 | 0.824776  | 4.982693  |
| H  | 8.061409  | 0.235725  | -1.072731 |
| H  | 9.019702  | -0.184119 | -2.515573 |
| H  | 8.276669  | -1.468307 | -1.537084 |

|   |           |           |           |
|---|-----------|-----------|-----------|
| H | 1.491773  | 1.711904  | 4.342111  |
| H | -5.092509 | -3.817512 | -1.237024 |
| H | -4.451417 | -4.837585 | 0.766017  |
| H | -3.845746 | -3.624777 | 1.916837  |
| H | -2.937268 | -5.136217 | 1.644124  |
| H | -1.293396 | -2.848325 | 2.641577  |
| H | 4.441351  | -4.695968 | -1.752053 |
| H | 4.525079  | -5.622742 | -0.233346 |
| H | 5.888536  | -4.606719 | -0.716980 |
| H | -5.908466 | -2.636752 | -4.384696 |
| H | -7.583130 | -3.208865 | -4.176243 |
| H | -6.252670 | -4.029060 | -3.331650 |
| H | 7.065663  | -2.353584 | -3.703713 |
| H | 7.837023  | -1.047775 | -4.630219 |
| H | 6.063685  | -1.224396 | -4.645120 |
| H | -1.679345 | 0.873378  | -2.561969 |
| H | -2.106024 | 2.592275  | -2.416518 |
| H | -3.177319 | 1.475898  | -3.312357 |
| H | -5.055309 | 2.438449  | -1.754934 |
| H | -3.917979 | 3.308746  | -0.705105 |
| H | -4.989977 | 2.071079  | -0.010135 |
| H | -7.500635 | -3.613634 | -1.048718 |
| H | -8.805339 | -2.808057 | -1.947004 |
| H | -7.975176 | -1.952578 | -0.622433 |

106

[IV]2[AlCl4]2 scf done: -10142.2377503

|    |           |           |           |
|----|-----------|-----------|-----------|
| C  | -4.409918 | -2.006461 | 2.880305  |
| C  | -4.253970 | -3.403296 | 2.650396  |
| C  | -3.622549 | -3.573965 | 1.387885  |
| C  | -3.378997 | -2.271577 | 0.831698  |
| C  | -3.890004 | -1.307823 | 1.760724  |
| Fe | -2.411883 | -2.477643 | 2.586657  |
| C  | -1.139757 | -1.513134 | 3.861260  |
| C  | -0.634767 | -1.509993 | 2.504844  |
| C  | -0.485615 | -2.888025 | 2.110882  |
| C  | -0.872149 | -3.703360 | 3.203123  |
| C  | -1.271107 | -2.859462 | 4.276850  |
| P  | -0.351877 | -0.063136 | 1.474442  |
| C  | -0.568857 | 1.489967  | 2.508836  |
| C  | -2.052548 | 1.624649  | 2.883725  |
| P  | -2.368728 | -2.080153 | -0.665036 |
| C  | -3.639163 | -1.855920 | -2.044019 |
| C  | -4.071585 | -3.299451 | -2.358737 |
| P  | -1.631842 | 0.062075  | -0.385817 |
| P  | 0.352193  | -0.064054 | -1.474616 |
| P  | 1.632159  | 0.062240  | 0.385546  |
| P  | 2.369161  | -2.079779 | 0.666052  |
| C  | 3.639663  | -1.854428 | 2.044776  |
| C  | 4.072211  | -3.297679 | 2.360604  |
| C  | 0.634854  | -1.511701 | -2.503966 |
| C  | 1.139496  | -1.515933 | -3.860504 |
| C  | 1.270791  | -2.862592 | -4.275031 |
| C  | 0.872115  | -3.705628 | -3.200523 |

|    |           |           |           |
|----|-----------|-----------|-----------|
| C  | 0.485815  | -2.889416 | -2.108859 |
| Fe | 2.411965  | -2.479376 | -2.585370 |
| C  | 4.409960  | -2.008373 | -2.879586 |
| C  | 4.254032  | -3.405061 | -2.648763 |
| C  | 3.622769  | -3.574916 | -1.386065 |
| C  | 3.379307  | -2.272172 | -0.830660 |
| C  | 3.890206  | -1.309019 | -1.760374 |
| C  | 0.569166  | 1.488224  | -2.510262 |
| C  | 2.052679  | 1.622283  | -2.886073 |
| C  | -0.366150 | 1.413324  | -3.729228 |
| C  | 0.157431  | 2.704829  | -1.680701 |
| C  | 2.921749  | -1.253064 | 3.257344  |
| C  | 4.852245  | -1.018118 | 1.644690  |
| C  | -2.921250 | -1.255439 | -3.257021 |
| C  | -4.851807 | -1.019360 | -1.644655 |
| C  | 0.365855  | 1.415923  | 3.728308  |
| C  | -0.156384 | 2.705717  | 1.678397  |
| Cl | -2.752011 | 4.429217  | 0.043675  |
| Al | -4.419120 | 3.349531  | -0.792644 |
| Cl | -6.076828 | 4.602112  | -1.251456 |
| Cl | -5.013828 | 1.823426  | 0.655951  |
| Cl | -3.724277 | 2.323738  | -2.590745 |
| Cl | 2.751362  | 4.430886  | -0.044046 |
| Al | 4.418511  | 3.350654  | 0.791420  |
| Cl | 3.724458  | 2.325247  | 2.590014  |
| Cl | 5.011661  | 1.824067  | -0.657367 |
| Cl | 6.077108  | 4.602500  | 1.249001  |
| H  | -1.388388 | -0.651235 | 4.470259  |
| H  | -1.643524 | -3.184156 | 5.246075  |
| H  | -0.889066 | -4.791101 | 3.201821  |
| H  | -0.149634 | -3.242060 | 1.142767  |
| H  | -3.894908 | -0.226782 | 1.623705  |
| H  | -4.845598 | -1.546434 | 3.765116  |
| H  | -4.545551 | -4.201697 | 3.329957  |
| H  | -3.327119 | -4.522666 | 0.941546  |
| H  | -2.454727 | 0.770556  | 3.442933  |
| H  | -2.156414 | 2.521016  | 3.513173  |
| H  | -2.684848 | 1.796161  | 1.999763  |
| H  | 0.136542  | 2.285136  | 4.363016  |
| H  | 0.261810  | 0.515178  | 4.342695  |
| H  | 1.415966  | 1.522523  | 3.424579  |
| H  | 0.904876  | 2.689191  | 1.393194  |
| H  | -0.799227 | 2.850813  | 0.803709  |
| H  | -0.296147 | 3.598113  | 2.306299  |
| H  | -4.810765 | -3.279220 | -3.175380 |
| H  | -3.224948 | -3.924894 | -2.682943 |
| H  | -4.554806 | -3.781000 | -1.493791 |
| H  | -2.010164 | -1.816267 | -3.522971 |
| H  | -3.594688 | -1.274066 | -4.128225 |
| H  | -2.668187 | -0.198948 | -3.087163 |
| H  | -5.538112 | -0.939718 | -2.503012 |
| H  | -5.403816 | -1.480261 | -0.812536 |
| H  | -4.581161 | 0.003022  | -1.352845 |
| H  | 1.387864  | -0.654525 | -4.470301 |



|   |           |           |           |
|---|-----------|-----------|-----------|
| H | 0.150091  | -3.242683 | -1.140378 |
| H | 2.454340  | 0.767683  | -3.444875 |
| H | 2.156345  | 2.518127  | -3.516302 |
| H | 2.685612  | 1.794290  | -2.002660 |
| H | -0.136785 | 2.281786  | -4.364944 |
| H | -0.262748 | 0.511898  | -4.342735 |
| H | -1.416074 | 1.520649  | -3.425107 |
| H | -0.903625 | 2.688712  | -1.394677 |
| H | 0.800995  | 2.850830  | -0.806673 |
| H | 0.296755  | 3.596546  | -2.309669 |
| H | 3.895146  | -0.227897 | -1.624014 |
| H | 3.327389  | -4.523332 | -0.939088 |
| H | 4.811506  | -3.276751 | 3.177126  |
| H | 3.225653  | -3.922904 | 2.685436  |
| H | 4.555331  | -3.779903 | 1.495977  |
| H | 2.010731  | -1.813778 | 3.523766  |
| H | 3.595224  | -1.270942 | 4.128534  |
| H | 2.668573  | -0.196727 | 3.086685  |
| H | 5.538453  | -0.937508 | 2.503032  |
| H | 5.404380  | -1.479853 | 0.813112  |
| H | 4.581561  | 0.003930  | 1.351744  |
| H | 1.642977  | -3.188063 | -5.244084 |
| H | 0.889071  | -4.793367 | -3.198337 |
| H | 4.845538  | -1.548913 | -3.764742 |
| H | 4.545522  | -4.203899 | -3.327850 |

97

Fc'(TipP)2 scf done: -3501.371906

|    |           |           |           |
|----|-----------|-----------|-----------|
| C  | 1.501538  | 1.227537  | 1.545986  |
| C  | 0.441557  | 1.651062  | 0.703940  |
| C  | 0.655344  | 2.760364  | -0.149360 |
| C  | 1.850502  | 3.473983  | -0.063964 |
| C  | 2.874476  | 3.111460  | 0.808915  |
| C  | 2.682977  | 1.974788  | 1.586783  |
| P  | -1.120267 | 0.657926  | 0.904210  |
| C  | -2.694655 | 1.510262  | 0.438475  |
| C  | -3.310254 | 1.823845  | -0.828176 |
| C  | -4.711751 | 1.961705  | -0.632947 |
| C  | -4.993310 | 1.732817  | 0.744098  |
| C  | -3.762245 | 1.466603  | 1.401875  |
| Fe | -4.034688 | 0.088648  | -0.089544 |
| C  | -3.476630 | -1.687906 | 0.691530  |
| C  | -2.758498 | -1.417441 | -0.530541 |
| C  | -3.754492 | -1.305875 | -1.562757 |
| C  | -5.041468 | -1.490346 | -0.989178 |
| C  | -4.867893 | -1.735198 | 0.402822  |
| P  | -1.104487 | -0.670181 | -0.889106 |
| C  | 0.373253  | -1.760952 | -0.586885 |
| C  | 1.514717  | -1.405751 | -1.354646 |
| C  | 2.644884  | -2.224253 | -1.318474 |
| C  | 2.708194  | -3.375349 | -0.536205 |
| C  | 1.607587  | -3.671812 | 0.260930  |
| C  | 0.456429  | -2.880031 | 0.272364  |

|   |           |           |           |
|---|-----------|-----------|-----------|
| C | 1.580109  | -0.156555 | -2.231579 |
| C | 1.346585  | -0.510170 | -3.702517 |
| C | -0.664845 | -3.255954 | 1.222422  |
| C | -0.179339 | -3.654997 | 2.618891  |
| C | 3.959456  | -4.232226 | -0.493679 |
| C | 4.377281  | -4.719113 | -1.884084 |
| C | -0.374799 | 3.204488  | -1.170673 |
| C | 0.225507  | 3.573901  | -2.530091 |
| C | 4.180297  | 3.882337  | 0.854928  |
| C | 4.971607  | 3.691836  | -0.444551 |
| C | 1.429505  | -0.019601 | 2.425006  |
| C | 2.683988  | -0.889622 | 2.306537  |
| C | -1.240045 | 4.343409  | -0.622445 |
| C | 1.122306  | 0.352868  | 3.877618  |
| C | 3.965558  | 5.365597  | 1.169447  |
| C | -1.561010 | -4.341573 | 0.618675  |
| C | 5.102405  | -3.490392 | 0.209623  |
| C | 2.876035  | 0.632976  | -2.027930 |
| H | -3.544696 | -1.058695 | -2.602427 |
| H | -5.660870 | -1.908021 | 1.128123  |
| H | -5.976661 | 1.750015  | 1.209938  |
| H | -5.441745 | 2.184100  | -1.409086 |
| H | -2.051452 | 4.595237  | -1.323378 |
| H | 2.909561  | -1.113922 | 1.253562  |
| H | -1.012293 | 2.334512  | -1.351858 |
| H | 1.655690  | -4.547733 | 0.912833  |
| H | 0.765944  | 0.515024  | -1.929603 |
| H | 3.512742  | -1.944834 | -1.920112 |
| H | -1.257718 | -2.347307 | 1.360347  |
| H | 0.596055  | -0.639155 | 2.069148  |
| H | 3.718890  | -5.122364 | 0.111779  |
| H | -3.049209 | -1.785739 | 1.686199  |
| H | 3.491719  | 1.652516  | 2.247371  |
| H | -5.990585 | -1.443814 | -1.519547 |
| H | 0.815770  | 4.502540  | -2.492817 |
| H | -0.580691 | 3.734886  | -3.262430 |
| H | 0.874752  | 2.772845  | -2.913167 |
| H | 2.121284  | -1.201596 | -4.071475 |
| H | 1.370527  | 0.394664  | -4.330377 |
| H | 0.367218  | -0.993961 | -3.835910 |
| H | 0.356178  | -4.616912 | 2.620768  |
| H | -1.040591 | -3.764580 | 3.295993  |
| H | 0.489461  | -2.892155 | 3.044090  |
| H | -3.638716 | 1.209188  | 2.452838  |
| H | 4.779333  | 3.451641  | 1.674920  |
| H | -1.937587 | -4.045789 | -0.370580 |
| H | -2.430216 | -4.540178 | 1.265325  |
| H | -0.998533 | -5.282108 | 0.501839  |
| H | 3.556020  | -5.256661 | -2.380781 |
| H | 5.240904  | -5.398455 | -1.814783 |
| H | 4.669597  | -3.878610 | -2.533209 |
| H | 1.992794  | 4.336288  | -0.719422 |
| H | -0.629116 | 5.247216  | -0.465634 |
| H | -1.697823 | 4.071919  | 0.339115  |

|   |           |           |           |
|---|-----------|-----------|-----------|
| H | -2.812038 | 1.890739  | -1.791966 |
| H | 3.042708  | 0.846166  | -0.961769 |
| H | 2.818685  | 1.597723  | -2.554886 |
| H | 3.758309  | 0.102769  | -2.419582 |
| H | 5.149529  | 2.625287  | -0.647434 |
| H | 5.946871  | 4.200270  | -0.389388 |
| H | 4.423293  | 4.107827  | -1.304998 |
| H | 5.389113  | -2.586351 | -0.351254 |
| H | 5.993991  | -4.131138 | 0.294759  |
| H | 4.806402  | -3.174906 | 1.221181  |
| H | 2.529487  | -1.847890 | 2.825979  |
| H | 3.569242  | -0.415135 | 2.758156  |
| H | 1.912556  | 0.995851  | 4.297581  |
| H | 1.048587  | -0.549702 | 4.504865  |
| H | 0.168232  | 0.896925  | 3.946540  |
| H | 3.399874  | 5.867869  | 0.368747  |
| H | 4.930754  | 5.885946  | 1.268638  |
| H | 3.406464  | 5.496381  | 2.107755  |

109

[4<sup>2+</sup>]<sub>2</sub> [AlCl<sub>4</sub>]-scf done: -8349.544325

|    |           |           |           |
|----|-----------|-----------|-----------|
| C  | 0.001360  | 4.875559  | 2.080575  |
| C  | -0.226502 | 3.489524  | 2.286383  |
| C  | 0.203606  | 2.804239  | 1.097629  |
| C  | 0.718996  | 3.779180  | 0.178420  |
| C  | 0.579792  | 5.051623  | 0.790886  |
| Fe | -1.244417 | 4.092171  | 0.630145  |
| C  | -2.247515 | 3.832705  | -1.119513 |
| C  | -2.687895 | 2.929243  | -0.091164 |
| C  | -3.210268 | 3.706488  | 0.999584  |
| C  | -3.063599 | 5.074851  | 0.649190  |
| C  | -2.475959 | 5.151834  | -0.646457 |
| P  | -2.622919 | 1.150760  | -0.155277 |
| C  | -4.131107 | 0.403185  | -0.771122 |
| C  | -5.114782 | -0.051218 | 0.136020  |
| C  | -6.147678 | -0.831055 | -0.373501 |
| C  | -6.244187 | -1.143167 | -1.731344 |
| C  | -5.317087 | -0.581055 | -2.608674 |
| C  | -4.249720 | 0.193139  | -2.163103 |
| C  | -5.143597 | 0.336560  | 1.605989  |
| C  | -6.288463 | 1.324770  | 1.864395  |
| C  | -7.296435 | -2.107417 | -2.237529 |
| C  | -8.713864 | -1.728409 | -1.801353 |
| C  | -3.303966 | 0.802840  | -3.186111 |
| C  | -4.017031 | 1.905340  | -3.978493 |
| P  | 0.178854  | 1.032367  | 0.885640  |
| P  | -1.659884 | -0.069832 | 1.415632  |
| P  | -0.860430 | -0.043111 | -0.737541 |
| C  | 1.702323  | 0.214002  | 1.294383  |
| C  | 1.903930  | -0.378209 | 2.562805  |
| C  | 3.052902  | -1.140912 | 2.730311  |
| C  | 3.983095  | -1.328344 | 1.701561  |
| C  | 3.776023  | -0.678591 | 0.484995  |
| C  | 2.657216  | 0.111340  | 0.253990  |

|    |           |           |           |
|----|-----------|-----------|-----------|
| C  | 0.957638  | -0.195546 | 3.737501  |
| C  | 0.324182  | -1.522441 | 4.166338  |
| C  | 2.565608  | 0.891935  | -1.045000 |
| C  | 3.544048  | 2.072402  | -1.003767 |
| C  | 5.201163  | -2.205682 | 1.892257  |
| C  | 4.783722  | -3.656095 | 2.157855  |
| C  | -5.203828 | -0.874257 | 2.539932  |
| C  | -6.927409 | -3.534174 | -1.807838 |
| C  | -2.662263 | -0.245257 | -4.100412 |
| C  | 2.752533  | 0.007900  | -2.280488 |
| C  | 6.119900  | -1.654596 | 2.986441  |
| C  | 1.654607  | 0.515398  | 4.903024  |
| Cl | 0.455526  | -2.744527 | 0.214452  |
| Al | -1.480838 | -3.752686 | 0.240508  |
| Cl | -1.351018 | -5.807723 | -0.241670 |
| Cl | -2.358325 | -3.377794 | 2.188520  |
| Cl | -2.715965 | -2.644182 | -1.192036 |
| Cl | 6.933698  | 0.800444  | 0.154515  |
| Al | 7.231840  | -0.034011 | -1.839336 |
| Cl | 6.237980  | 1.260328  | -3.263416 |
| Cl | 6.217954  | -1.962166 | -1.879953 |
| Cl | 9.315702  | -0.246233 | -2.262685 |
| H  | 4.524880  | -0.795845 | -0.298367 |
| H  | -4.213643 | 0.881156  | 1.840656  |
| H  | 0.140059  | 0.477385  | 3.422475  |
| H  | 3.230831  | -1.617417 | 3.697454  |
| H  | 1.550737  | 1.329865  | -1.120696 |
| H  | -2.480995 | 1.300714  | -2.646208 |
| H  | 5.761336  | -2.180566 | 0.945425  |
| H  | 1.132989  | 3.579945  | -0.807820 |
| H  | -5.416849 | -0.781411 | -3.678112 |
| H  | -0.241376 | 5.668193  | 2.785319  |
| H  | -6.157324 | -1.413108 | 2.432111  |
| H  | -5.128536 | -0.550852 | 3.588966  |
| H  | -4.392805 | -1.588905 | 2.336573  |
| H  | -3.337955 | 5.920752  | 1.276141  |
| H  | 2.471786  | -0.097636 | 5.311382  |
| H  | 0.940890  | 0.704119  | 5.719656  |
| H  | 2.085956  | 1.476517  | 4.585170  |
| H  | 3.768103  | -0.410892 | -2.328116 |
| H  | 2.609043  | 0.599744  | -3.196385 |
| H  | 2.039273  | -0.831277 | -2.278517 |
| H  | -1.802708 | 3.556112  | -2.073883 |
| H  | -7.263722 | -2.069522 | -3.338798 |
| H  | -0.656119 | 3.028408  | 3.174277  |
| H  | 3.354928  | 2.713620  | -0.128136 |
| H  | 3.458900  | 2.676955  | -1.919839 |
| H  | 4.583972  | 1.725089  | -0.939236 |
| H  | -2.221999 | 6.066211  | -1.178723 |
| H  | 6.446566  | -0.634876 | 2.738161  |
| H  | 7.018361  | -2.283481 | 3.074585  |
| H  | 5.622734  | -1.641166 | 3.970805  |
| H  | 0.855544  | 6.001881  | 0.338349  |
| H  | -6.899474 | -1.219203 | 0.316769  |

|   |           |           |           |
|---|-----------|-----------|-----------|
| H | -7.265680 | 0.854030  | 1.677969  |
| H | -6.212518 | 2.207388  | 1.210887  |
| H | -6.274819 | 1.663377  | 2.911716  |
| H | -3.623481 | 3.316506  | 1.928226  |
| H | -0.164750 | -2.037935 | 3.326954  |
| H | -0.424758 | -1.360669 | 4.956568  |
| H | 1.088919  | -2.205840 | 4.565479  |
| H | -5.904812 | -3.792903 | -2.117902 |
| H | -7.623010 | -4.262916 | -2.250170 |
| H | -6.976894 | -3.639537 | -0.712523 |
| H | 4.253464  | -3.757885 | 3.119203  |
| H | 5.671587  | -4.304644 | 2.195395  |
| H | 4.120639  | -4.030038 | 1.363925  |
| H | -2.184701 | -1.048240 | -3.520462 |
| H | -1.905466 | 0.223448  | -4.746719 |
| H | -3.411322 | -0.713031 | -4.756853 |
| H | -4.849770 | 1.492574  | -4.567879 |
| H | -3.318602 | 2.387965  | -4.678984 |
| H | -4.428557 | 2.676627  | -3.309575 |
| H | -8.838532 | -1.806105 | -0.709871 |
| H | -9.446591 | -2.408480 | -2.260337 |
| H | -8.967556 | -0.700652 | -2.101268 |

196

starting komplex of the formation of  $4^{2+}$  SCF done: -7684.757027

|    |           |           |           |
|----|-----------|-----------|-----------|
| C  | -4.442513 | 0.382581  | 2.834317  |
| C  | -3.312162 | -0.354489 | 2.414113  |
| C  | -2.072904 | -0.242282 | 3.087185  |
| C  | -1.966594 | 0.692890  | 4.113443  |
| C  | -3.047115 | 1.483137  | 4.514897  |
| C  | -4.272908 | 1.290486  | 3.880079  |
| P  | -3.407362 | -1.461213 | 0.987654  |
| C  | -4.182550 | -3.044586 | 1.356722  |
| C  | -5.457760 | -3.279969 | 1.979116  |
| C  | -5.833916 | -4.618451 | 1.695760  |
| C  | -4.808893 | -5.220183 | 0.912351  |
| C  | -3.785110 | -4.262150 | 0.698164  |
| Fe | -5.524975 | -3.524843 | -0.050701 |
| C  | -5.338496 | -1.995249 | -1.331000 |
| C  | -5.149445 | -3.230589 | -2.034496 |
| C  | -6.344029 | -3.988926 | -1.898214 |
| C  | -7.272387 | -3.233807 | -1.126442 |
| C  | -6.663010 | -1.998559 | -0.771664 |
| P  | -4.043256 | -0.773584 | -0.978595 |
| P  | -2.071517 | -1.557234 | -0.701535 |
| C  | -0.869137 | -1.110252 | 2.750003  |
| C  | -0.266183 | -1.765966 | 3.996646  |
| C  | -2.907311 | 2.489836  | 5.639216  |
| C  | -2.718784 | 1.781710  | 6.986226  |
| C  | -5.837919 | 0.205080  | 2.254379  |
| C  | -6.824112 | -0.248116 | 3.340970  |
| C  | -4.446272 | 0.898548  | -1.589969 |
| C  | -3.878165 | 2.041775  | -0.970469 |

|    |           |           |           |
|----|-----------|-----------|-----------|
| C  | -4.334065 | 3.303516  | -1.353541 |
| C  | -5.301907 | 3.481407  | -2.334537 |
| C  | -5.759508 | 2.345939  | -3.006576 |
| C  | -5.344357 | 1.054102  | -2.693839 |
| C  | -2.713842 | 1.995726  | 0.005688  |
| C  | -2.800497 | 3.000995  | 1.154716  |
| C  | -5.756146 | -0.084975 | -3.628517 |
| C  | -6.822375 | 0.285668  | -4.659869 |
| C  | -5.814294 | 4.860710  | -2.694024 |
| C  | -5.486532 | 5.223781  | -4.146723 |
| C  | -1.409967 | 2.170596  | -0.781007 |
| C  | -7.314889 | 4.981691  | -2.404485 |
| C  | -4.517857 | -0.648853 | -4.342211 |
| C  | 0.175325  | -0.314931 | 1.964526  |
| C  | -6.359739 | 1.460227  | 1.548266  |
| C  | -1.784743 | 3.496406  | 5.369774  |
| C  | 1.229518  | 0.590905  | -2.210995 |
| C  | 1.084932  | 0.839164  | -3.602443 |
| C  | 2.027636  | 1.840589  | -3.974425 |
| C  | 2.760498  | 2.215301  | -2.816807 |
| C  | 2.277983  | 1.438515  | -1.713932 |
| Fe | 2.986617  | 0.200713  | -3.167947 |
| C  | 3.217862  | -1.822297 | -3.090637 |
| C  | 4.191225  | -1.134486 | -2.287340 |
| C  | 4.971753  | -0.290212 | -3.156257 |
| C  | 4.461454  | -0.448523 | -4.469243 |
| C  | 3.390917  | -1.386838 | -4.429771 |
| P  | 4.417521  | -1.284110 | -0.532664 |
| C  | 5.033984  | -2.878527 | 0.009106  |
| C  | 6.426117  | -3.057078 | 0.136557  |
| C  | 6.881227  | -4.304226 | 0.564358  |
| C  | 6.007465  | -5.354714 | 0.850532  |
| C  | 4.633223  | -5.143404 | 0.689822  |
| C  | 4.118007  | -3.921875 | 0.267653  |
| P  | 2.639734  | 1.582023  | 0.055186  |
| P  | 3.946591  | 0.061783  | 0.878125  |
| C  | 7.410608  | -1.933941 | -0.141956 |
| C  | 8.556560  | -2.360156 | -1.061499 |
| C  | 6.534653  | -6.698441 | 1.314448  |
| C  | 6.214365  | -7.801452 | 0.299246  |
| C  | 2.615703  | -3.744384 | 0.112560  |
| C  | 1.994125  | -4.793895 | -0.812512 |
| C  | 3.498299  | 3.167354  | 0.393178  |
| C  | 4.799700  | 3.490848  | -0.068166 |
| C  | 5.354401  | 4.712058  | 0.309417  |
| C  | 4.675563  | 5.628039  | 1.114126  |
| C  | 3.390696  | 5.295958  | 1.538704  |
| C  | 2.779906  | 4.087781  | 1.199075  |
| C  | 5.647049  | 2.569908  | -0.936031 |
| C  | 6.207110  | 3.276417  | -2.176733 |
| C  | 1.390425  | 3.788448  | 1.751768  |
| C  | 0.468882  | 5.008157  | 1.803888  |
| C  | 5.314328  | 6.945606  | 1.506908  |
| C  | 5.579670  | 7.823568  | 0.278738  |

|   |           |           |           |
|---|-----------|-----------|-----------|
| C | 1.498154  | 3.116596  | 3.125087  |
| C | 6.587578  | 6.726395  | 2.331337  |
| C | 6.787874  | 1.942232  | -0.125635 |
| C | 7.916906  | -1.324603 | 1.169323  |
| C | 6.018861  | -7.048541 | 2.714586  |
| C | 1.926908  | -3.703103 | 1.479209  |
| H | 0.649932  | -0.117102 | -1.618828 |
| H | 0.391342  | 0.335069  | -4.272770 |
| H | 3.547278  | 2.962688  | -2.772456 |
| H | 2.176264  | 2.240040  | -4.975744 |
| H | 4.820331  | 0.072660  | -5.354426 |
| H | 2.789309  | -1.702175 | -5.279818 |
| H | 2.473860  | -2.531908 | -2.734515 |
| H | 5.799737  | 0.348027  | -2.856488 |
| H | -7.120330 | -1.198526 | -0.192306 |
| H | -8.272528 | -3.552492 | -0.839427 |
| H | -4.239656 | -3.537799 | -2.547016 |
| H | -6.510790 | -4.987010 | -2.298332 |
| H | -4.814315 | -6.238422 | 0.528752  |
| H | -6.757997 | -5.095837 | 2.015648  |
| H | -6.042181 | -2.566513 | 2.551198  |
| H | -2.880274 | -4.400132 | 0.109645  |
| H | -1.010993 | 0.798525  | 4.631920  |
| H | -5.132439 | 1.876112  | 4.215955  |
| H | -6.460268 | 2.484059  | -3.828331 |
| H | -3.913272 | 4.185272  | -0.867049 |
| H | 7.955214  | -4.468241 | 0.680503  |
| H | 3.943446  | -5.964322 | 0.900939  |
| H | 2.850289  | 6.010336  | 2.162622  |
| H | 6.360396  | 4.961577  | -0.035719 |
| H | -1.211925 | -1.940173 | 2.107436  |
| H | -3.854598 | 3.051128  | 5.685939  |
| H | -5.793163 | -0.597559 | 1.502541  |
| H | 0.511226  | -2.486662 | 3.706022  |
| H | 0.207567  | -1.026052 | 4.658651  |
| H | -1.030150 | -2.302122 | 4.577653  |
| H | 1.026069  | -0.956277 | 1.688654  |
| H | -0.247206 | 0.106745  | 1.040824  |
| H | 0.564643  | 0.520290  | 2.564867  |
| H | -1.785394 | 4.283570  | 6.137617  |
| H | -0.795154 | 3.013987  | 5.400044  |
| H | -1.901058 | 3.979792  | 4.387770  |
| H | -2.679529 | 2.515698  | 7.804345  |
| H | -3.544690 | 1.085526  | 7.192214  |
| H | -1.778803 | 1.207670  | 7.005934  |
| H | -7.772672 | -0.572961 | 2.887185  |
| H | -6.424266 | -1.074540 | 3.946946  |
| H | -7.058971 | 0.574130  | 4.032883  |
| H | -7.366423 | 1.278417  | 1.141972  |
| H | -6.438495 | 2.305395  | 2.249118  |
| H | -5.712185 | 1.767262  | 0.717940  |
| H | -2.676177 | 1.004771  | 0.465109  |
| H | -6.197420 | -0.888583 | -3.030204 |
| H | -7.109638 | -0.615164 | -5.220541 |

|   |           |           |           |
|---|-----------|-----------|-----------|
| H | -7.732581 | 0.683258  | -4.188489 |
| H | -6.458620 | 1.021308  | -5.393230 |
| H | -4.795958 | -1.499301 | -4.981835 |
| H | -4.054709 | 0.122172  | -4.977241 |
| H | -3.741640 | -1.004197 | -3.644384 |
| H | -5.288447 | 5.578523  | -2.043280 |
| H | -7.661537 | 6.006760  | -2.600851 |
| H | -7.902449 | 4.304630  | -3.044370 |
| H | -7.542279 | 4.740081  | -1.355682 |
| H | -5.798161 | 6.256345  | -4.361495 |
| H | -4.407913 | 5.144376  | -4.347228 |
| H | -6.013868 | 4.566540  | -4.855797 |
| H | -2.043834 | 2.750657  | 1.914136  |
| H | -2.602944 | 4.030578  | 0.820535  |
| H | -3.782890 | 2.981950  | 1.644998  |
| H | -0.539205 | 2.043439  | -0.119536 |
| H | -1.330763 | 1.432537  | -1.590760 |
| H | -1.353384 | 3.173867  | -1.231026 |
| H | 0.911978  | 3.064001  | 1.073903  |
| H | 4.999779  | 1.757864  | -1.294291 |
| H | -0.550452 | 4.690595  | 2.066756  |
| H | 0.782395  | 5.736845  | 2.566236  |
| H | 0.427132  | 5.525453  | 0.834098  |
| H | 0.500422  | 2.835057  | 3.495526  |
| H | 2.120367  | 2.209119  | 3.081191  |
| H | 1.955445  | 3.797551  | 3.859662  |
| H | 4.589834  | 7.476155  | 2.146193  |
| H | 6.995616  | 7.689964  | 2.670036  |
| H | 6.389491  | 6.108816  | 3.219701  |
| H | 7.369918  | 6.227060  | 1.738035  |
| H | 5.976193  | 8.802592  | 0.585364  |
| H | 6.321189  | 7.361539  | -0.392188 |
| H | 4.659451  | 7.994093  | -0.299164 |
| H | 7.631324  | -6.609641 | 1.375534  |
| H | 6.666271  | -8.753412 | 0.613949  |
| H | 5.128297  | -7.963519 | 0.211029  |
| H | 6.603003  | -7.553650 | -0.699331 |
| H | 6.471919  | -7.987544 | 3.064517  |
| H | 6.263676  | -6.260659 | 3.441941  |
| H | 4.926084  | -7.187925 | 2.718171  |
| H | 2.439346  | -2.759789 | -0.358864 |
| H | 0.932659  | -4.563764 | -0.992131 |
| H | 2.510945  | -4.831644 | -1.783075 |
| H | 2.042548  | -5.801510 | -0.373169 |
| H | 0.848195  | -3.511466 | 1.365893  |
| H | 2.046298  | -4.659004 | 2.011935  |
| H | 2.356957  | -2.913349 | 2.114153  |
| H | 6.857977  | -1.136519 | -0.675114 |
| H | 6.672086  | 2.548238  | -2.859281 |
| H | 5.430821  | 3.819109  | -2.735427 |
| H | 6.986299  | 4.006193  | -1.912458 |
| H | 7.357397  | 1.226499  | -0.740231 |
| H | 7.491523  | 2.712837  | 0.224029  |
| H | 6.420255  | 1.410900  | 0.765138  |



|   |          |           |           |
|---|----------|-----------|-----------|
| H | 8.594566 | -0.480963 | 0.971409  |
| H | 7.083624 | -0.960399 | 1.790045  |
| H | 8.469991 | -2.071530 | 1.759158  |
| H | 9.174659 | -1.489021 | -1.324125 |
| H | 9.219281 | -3.091337 | -0.574964 |
| H | 8.179808 | -2.808810 | -1.992142 |

196

intermediar during the formation of  $4^{2+}$  scf done: -7684.794477

|   |           |           |           |
|---|-----------|-----------|-----------|
| C | -2.015880 | -2.360779 | 2.290461  |
| C | -1.774295 | -1.101818 | 1.648228  |
| C | -1.567456 | 0.065841  | 2.443946  |
| C | -1.611579 | -0.064934 | 3.834688  |
| C | -1.854472 | -1.268182 | 4.479953  |
| C | -2.050947 | -2.393305 | 3.679429  |
| P | -1.760876 | -0.966309 | -0.180284 |
| P | -2.472202 | 0.952002  | -1.207319 |
| C | -3.966476 | 1.737053  | -0.493732 |
| C | -3.958429 | 3.148755  | -0.681276 |
| C | -5.077637 | 3.880616  | -0.281235 |
| C | -6.181434 | 3.292064  | 0.329146  |
| C | -6.142573 | 1.915397  | 0.544853  |
| C | -5.069444 | 1.119045  | 0.149500  |
| C | -2.796413 | 3.903455  | -1.327356 |
| C | -2.636889 | 5.336473  | -0.816013 |
| C | -7.371548 | 4.120346  | 0.769353  |
| C | -7.526758 | 4.098434  | 2.294331  |
| C | -5.143064 | -0.350189 | 0.533733  |
| C | -5.089054 | -0.543322 | 2.055253  |
| C | -1.333656 | 1.502682  | 1.971257  |
| C | -0.076164 | 2.131670  | 2.602544  |
| C | -1.871524 | -1.405411 | 5.989216  |
| C | -2.236977 | -0.117733 | 6.725671  |
| C | -2.197816 | -3.685884 | 1.557442  |
| C | -2.872395 | -4.788862 | 2.375263  |
| P | 0.222594  | -0.528819 | -1.194831 |
| P | 1.514065  | 0.290958  | 0.388931  |
| P | 1.915903  | 2.226821  | -0.612343 |
| C | 3.087454  | 3.224389  | 0.379982  |
| C | 4.378947  | 2.830352  | 0.803294  |
| C | 5.173342  | 3.751986  | 1.487446  |
| C | 4.746106  | 5.047389  | 1.767035  |
| C | 3.467884  | 5.414556  | 1.346596  |
| C | 2.623373  | 4.541527  | 0.663223  |
| C | 4.928723  | 1.422068  | 0.640003  |
| C | 6.356135  | 1.371094  | 0.083909  |
| C | 5.638933  | 6.026288  | 2.503548  |
| C | 5.987868  | 7.231576  | 1.623066  |
| C | 1.280527  | 5.076985  | 0.168710  |
| C | 0.651832  | 6.116814  | 1.098615  |
| P | 2.106646  | -1.583175 | -0.637581 |
| C | 3.131568  | -1.369085 | -2.088647 |
| C | 4.539136  | -1.080068 | -2.051545 |
| C | 5.009263  | -1.066497 | -3.388859 |

|    |           |           |           |
|----|-----------|-----------|-----------|
| C  | 3.914923  | -1.344446 | -4.256596 |
| C  | 2.750330  | -1.522693 | -3.468233 |
| Fe | 3.504052  | 0.333124  | -3.138450 |
| C  | 2.890712  | 1.729646  | -4.517531 |
| C  | 1.978913  | 1.674194  | -3.431403 |
| C  | 2.700528  | 1.978729  | -2.227407 |
| C  | 4.056142  | 2.245488  | -2.599177 |
| C  | 4.170762  | 2.082494  | -4.004105 |
| C  | 2.313319  | -3.175189 | 0.221654  |
| C  | 2.603343  | -3.256027 | 1.610523  |
| C  | 2.671263  | -4.520426 | 2.192091  |
| C  | 2.489011  | -5.698868 | 1.472131  |
| C  | 2.241136  | -5.588927 | 0.105979  |
| C  | 2.133737  | -4.361777 | -0.542603 |
| C  | 2.811682  | -2.065009 | 2.529022  |
| C  | 1.522555  | -1.741951 | 3.289179  |
| C  | 1.867952  | -4.386344 | -2.038644 |
| C  | 0.786597  | -5.392573 | -2.446879 |
| C  | 2.505330  | -7.049386 | 2.156462  |
| C  | 1.224022  | -7.229759 | 2.982232  |
| C  | -2.358048 | -2.355308 | -1.205704 |
| C  | -3.706828 | -2.841500 | -1.361438 |
| C  | -3.731957 | -3.710416 | -2.483321 |
| C  | -2.423972 | -3.777030 | -3.033698 |
| C  | -1.569406 | -2.960600 | -2.248412 |
| Fe | -3.077569 | -1.806558 | -2.975960 |
| C  | -2.972786 | -0.866750 | -4.817961 |
| C  | -2.187358 | -0.191831 | -3.844886 |
| C  | -3.051361 | 0.178151  | -2.755349 |
| C  | -4.378227 | -0.237135 | -3.101426 |
| C  | -4.321533 | -0.891244 | -4.361057 |
| C  | -2.914529 | 3.891647  | -2.858133 |
| C  | -8.656409 | 3.675553  | 0.062403  |
| C  | -6.381703 | -1.055369 | -0.031446 |
| C  | 3.171547  | -4.648355 | -2.804914 |
| C  | 3.761891  | -7.264623 | 3.004297  |
| C  | 3.985715  | -2.249634 | 3.495062  |
| C  | 1.436506  | 5.627242  | -1.256181 |
| C  | 5.014939  | 6.460110  | 3.834485  |
| C  | -2.529078 | 2.407317  | 2.314998  |
| C  | -0.525087 | -1.961613 | 6.476023  |
| C  | -0.858498 | -4.183113 | 1.011803  |
| C  | 4.871231  | 0.696128  | 1.987407  |
| H  | 0.916016  | 1.448472  | -3.493480 |
| H  | 2.656409  | 1.520826  | -5.559702 |
| H  | 4.852517  | 2.536351  | -1.921023 |
| H  | 5.084431  | 2.193971  | -4.584813 |
| H  | 6.030982  | -0.854610 | -3.697515 |
| H  | 3.955970  | -1.379687 | -5.343384 |
| H  | 1.750172  | -1.735747 | -3.840947 |
| H  | 5.139071  | -0.913878 | -1.159965 |
| H  | -5.265074 | -0.080564 | -2.493237 |
| H  | -5.164854 | -1.337621 | -4.884316 |
| H  | -1.115196 | -0.012338 | -3.898486 |

|   |           |           |           |
|---|-----------|-----------|-----------|
| H | -2.607935 | -1.292029 | -5.750746 |
| H | -2.124686 | -4.347241 | -3.910357 |
| H | -4.614716 | -4.220427 | -2.863322 |
| H | -4.564280 | -2.603859 | -0.742733 |
| H | -0.508095 | -2.812688 | -2.425422 |
| H | -5.090446 | 4.959899  | -0.438129 |
| H | -6.984628 | 1.442437  | 1.055349  |
| H | 3.121128  | 6.427453  | 1.554705  |
| H | 6.167227  | 3.451072  | 1.827093  |
| H | 2.111609  | -6.504194 | -0.474421 |
| H | 2.874761  | -4.585988 | 3.261453  |
| H | -2.242182 | -3.343242 | 4.177859  |
| H | -1.458776 | 0.830342  | 4.436168  |
| H | -4.256332 | -0.837419 | 0.106713  |
| H | -1.867197 | 3.373314  | -1.061062 |
| H | -7.167714 | 5.161087  | 0.469282  |
| H | -9.492724 | 4.334252  | 0.338242  |
| H | -8.544762 | 3.707298  | -1.031285 |
| H | -8.937679 | 2.648996  | 0.346279  |
| H | -8.348053 | 4.760165  | 2.605938  |
| H | -7.761263 | 3.085823  | 2.659451  |
| H | -6.607855 | 4.436299  | 2.795992  |
| H | -2.055577 | 4.405212  | -3.315689 |
| H | -2.955173 | 2.871357  | -3.269130 |
| H | -3.831564 | 4.409844  | -3.178182 |
| H | -1.687351 | 5.751472  | -1.182467 |
| H | -3.433175 | 6.003034  | -1.178554 |
| H | -2.628026 | 5.381392  | 0.283387  |
| H | -6.395328 | -2.114186 | 0.271596  |
| H | -7.307445 | -0.608582 | 0.357911  |
| H | -6.431590 | -1.014638 | -1.128183 |
| H | -5.020198 | -1.613651 | 2.303598  |
| H | -4.226728 | -0.038803 | 2.508577  |
| H | -5.999238 | -0.148783 | 2.531593  |
| H | -2.863087 | -3.508851 | 0.709629  |
| H | -3.101308 | -5.636640 | 1.713549  |
| H | -2.225166 | -5.175798 | 3.176809  |
| H | -3.817862 | -4.452322 | 2.825108  |
| H | -0.995698 | -5.094756 | 0.411731  |
| H | -0.366420 | -3.438941 | 0.371435  |
| H | -0.162376 | -4.413630 | 1.832608  |
| H | -2.643879 | -2.157734 | 6.222496  |
| H | -0.544836 | -2.118022 | 7.564290  |
| H | -0.288325 | -2.925063 | 6.000069  |
| H | 0.291492  | -1.258649 | 6.247952  |
| H | -2.369177 | -0.322548 | 7.797333  |
| H | -1.444156 | 0.642119  | 6.640177  |
| H | -3.174520 | 0.316592  | 6.347918  |
| H | -1.192590 | 1.518054  | 0.878445  |
| H | 0.215487  | 3.033299  | 2.043484  |
| H | -0.269722 | 2.449916  | 3.637235  |
| H | 0.779496  | 1.445671  | 2.626785  |
| H | -3.484757 | 2.011984  | 1.958655  |
| H | -2.604988 | 2.544120  | 3.404000  |

|   |           |           |           |
|---|-----------|-----------|-----------|
| H | -2.387749 | 3.400742  | 1.864048  |
| H | 0.575045  | 4.232178  | 0.115334  |
| H | 6.578458  | 5.496598  | 2.731828  |
| H | -0.377145 | 6.329548  | 0.777012  |
| H | 0.618105  | 5.762907  | 2.140003  |
| H | 1.192144  | 7.074911  | 1.082343  |
| H | 0.477175  | 6.006215  | -1.639339 |
| H | 2.159020  | 6.457596  | -1.273883 |
| H | 1.799432  | 4.857985  | -1.956126 |
| H | 6.693366  | 7.895454  | 2.143796  |
| H | 6.451387  | 6.916759  | 0.676594  |
| H | 5.091841  | 7.824766  | 1.381376  |
| H | 5.706435  | 7.112645  | 4.387351  |
| H | 4.082828  | 7.025086  | 3.675853  |
| H | 4.782194  | 5.593273  | 4.470493  |
| H | 1.495206  | -3.394444 | -2.332914 |
| H | 2.501055  | -7.813460 | 1.362228  |
| H | 3.061439  | -1.199738 | 1.905206  |
| H | 3.777812  | -8.288706 | 3.404015  |
| H | 4.676951  | -7.117194 | 2.412542  |
| H | 3.797058  | -6.578632 | 3.864991  |
| H | 1.195387  | -8.231607 | 3.434870  |
| H | 1.173257  | -6.491442 | 3.798831  |
| H | 0.324617  | -7.111679 | 2.359182  |
| H | 4.188794  | -1.303632 | 4.017366  |
| H | 3.772457  | -3.000066 | 4.270077  |
| H | 4.902901  | -2.555755 | 2.970822  |
| H | 1.647353  | -0.834108 | 3.899141  |
| H | 0.676504  | -1.576626 | 2.608471  |
| H | 1.250425  | -2.567689 | 3.964256  |
| H | 0.508694  | -5.232454 | -3.499454 |
| H | 1.141553  | -6.430101 | -2.369077 |
| H | -0.118990 | -5.294458 | -1.832305 |
| H | 3.004682  | -4.578536 | -3.889983 |
| H | 3.960718  | -3.934405 | -2.532232 |
| H | 3.543375  | -5.660254 | -2.583593 |
| H | 4.281210  | 0.886055  | -0.071223 |
| H | 5.191400  | -0.350921 | 1.883429  |
| H | 5.540999  | 1.176415  | 2.716628  |
| H | 3.857164  | 0.718517  | 2.415275  |
| H | 6.670937  | 0.327070  | -0.068820 |
| H | 6.458107  | 1.896494  | -0.875670 |
| H | 7.080671  | 1.815248  | 0.781316  |

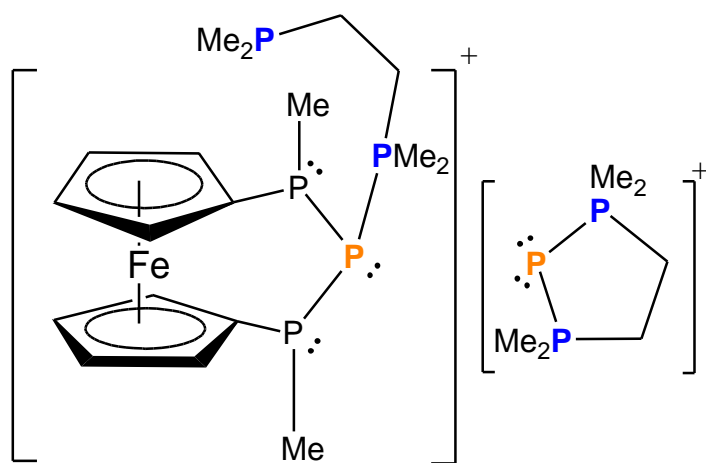

scf done: -4934.492702

|    |           |           |           |
|----|-----------|-----------|-----------|
| C  | -2.007727 | -3.112357 | -2.698858 |
| C  | -2.119275 | -1.756079 | -2.292871 |
| C  | -0.869852 | -1.359465 | -1.703542 |
| C  | 0.009678  | -2.496222 | -1.772676 |
| C  | -0.697384 | -3.567862 | -2.377991 |
| Fe | -1.655713 | -2.924144 | -0.670423 |
| C  | -2.961086 | -2.568505 | 0.860407  |
| C  | -3.155877 | -3.889388 | 0.371652  |
| C  | -1.930290 | -4.597242 | 0.509198  |
| C  | -0.970467 | -3.717689 | 1.075527  |
| C  | -1.598170 | -2.442772 | 1.293841  |
| P  | -0.629281 | -1.045098 | 1.921551  |
| C  | -1.293764 | -0.765845 | 3.622128  |
| P  | -0.278623 | 0.259028  | -1.135408 |
| C  | -1.072476 | 1.386000  | -2.359103 |
| P  | -1.146564 | 0.816129  | 0.847486  |
| P  | -3.335177 | 1.251192  | 0.746736  |
| C  | -4.322976 | 0.596310  | -0.626485 |
| C  | -3.569115 | 3.066980  | 0.766575  |
| C  | -2.964665 | 3.925434  | -0.347789 |
| P  | -1.129841 | 4.292419  | -0.220555 |
| C  | -1.067259 | 5.696618  | -1.414382 |
| C  | -4.142505 | 0.726101  | 2.284966  |
| C  | -1.079506 | 5.195967  | 1.385885  |
| P  | 3.105004  | -0.608368 | 0.265547  |
| P  | 5.157726  | -0.739617 | 0.898028  |
| C  | 6.171902  | -1.949341 | 0.000736  |
| P  | 3.565922  | 1.176548  | -0.839518 |
| C  | 5.378035  | 1.480103  | -0.686388 |
| C  | 5.900169  | 0.916960  | 0.634232  |
| C  | 3.207880  | 1.089367  | -2.614440 |
| C  | 2.703700  | 2.645847  | -0.213292 |
| C  | 5.294579  | -1.165333 | 2.652321  |
| H  | -0.860168 | -1.554317 | 4.255480  |
| H  | -0.815692 | 2.426131  | -2.119321 |
| H  | -2.384768 | -0.834793 | 3.706519  |
| H  | -0.943912 | 0.202379  | 4.008740  |
| H  | -2.161709 | 1.277624  | -2.441205 |
| H  | -0.642443 | 1.129398  | -3.339354 |
| H  | 0.072435  | -3.953139 | 1.281913  |

|   |           |           |           |
|---|-----------|-----------|-----------|
| H | -1.751815 | -5.627341 | 0.207055  |
| H | -4.078904 | -4.286074 | -0.046929 |
| H | -3.729284 | -1.802006 | 0.896135  |
| H | 1.034555  | -2.521223 | -1.403084 |
| H | -0.313172 | -4.571894 | -2.547158 |
| H | -2.793990 | -3.704284 | -3.163579 |
| H | -2.996536 | -1.130729 | -2.438290 |
| H | -4.666577 | 3.186308  | 0.776256  |
| H | -3.220382 | 3.399751  | 1.757941  |
| H | -5.386198 | 0.788991  | -0.419138 |
| H | -4.050522 | 1.097561  | -1.564150 |
| H | -4.154571 | -0.482969 | -0.731326 |
| H | -5.173011 | 1.111515  | 2.286055  |
| H | -4.167397 | -0.367087 | 2.371702  |
| H | -3.603995 | 1.145457  | 3.145609  |
| H | -3.504816 | 4.886451  | -0.343604 |
| H | -3.154648 | 3.481783  | -1.339453 |
| H | -0.058743 | 6.135411  | -1.405927 |
| H | -1.262791 | 5.331962  | -2.434022 |
| H | -1.794966 | 6.488104  | -1.176298 |
| H | -0.115625 | 5.720934  | 1.461484  |
| H | -1.885642 | 5.940405  | 1.482984  |
| H | -1.128066 | 4.491166  | 2.229232  |
| H | 3.511512  | 2.021417  | -3.113689 |
| H | 3.743590  | 0.235560  | -3.050741 |
| H | 2.128855  | 0.934177  | -2.747989 |
| H | 2.969766  | 3.530232  | -0.811087 |
| H | 1.615827  | 2.486585  | -0.264661 |
| H | 2.981948  | 2.804410  | 0.837553  |
| H | 5.578394  | 2.558530  | -0.778060 |
| H | 5.861054  | 0.988116  | -1.545246 |
| H | 6.998879  | 0.848477  | 0.642270  |
| H | 5.599508  | 1.545182  | 1.486968  |
| H | 5.715537  | -2.944185 | 0.105985  |
| H | 6.193780  | -1.694819 | -1.067780 |
| H | 7.196842  | -1.976312 | 0.399595  |
| H | 4.854971  | -2.159101 | 2.819649  |
| H | 6.350785  | -1.186775 | 2.958257  |
| H | 4.741850  | -0.428220 | 3.249810  |

79

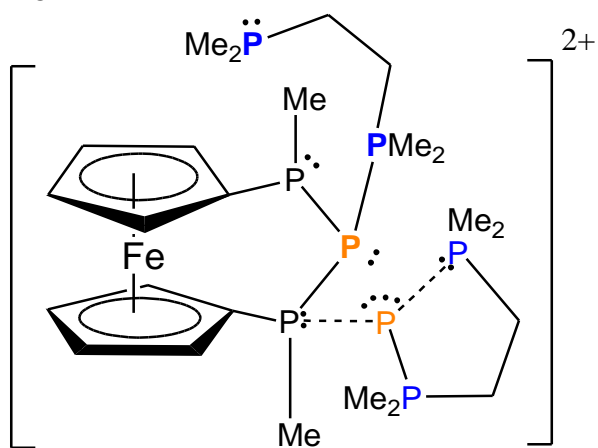

scf done: -4934.457916

|    |           |           |           |
|----|-----------|-----------|-----------|
| C  | -3.245973 | -0.772432 | 1.250243  |
| C  | -3.897093 | -0.359978 | 0.036174  |
| C  | -4.813275 | -1.376724 | -0.349702 |
| C  | -4.748104 | -2.418318 | 0.615587  |
| C  | -3.789456 | -2.056267 | 1.598416  |
| Fe | -2.877615 | -2.088168 | -0.228712 |
| C  | -1.812704 | -3.837289 | -0.520632 |
| C  | -2.373333 | -3.397462 | -1.754039 |
| C  | -1.898519 | -2.086453 | -2.019780 |
| C  | -1.027855 | -1.702193 | -0.936245 |
| C  | -0.979425 | -2.805712 | -0.013827 |
| P  | -0.009671 | -0.216451 | -0.815903 |
| P  | 2.125015  | -0.322104 | 0.261984  |
| P  | 3.004758  | -1.768046 | -1.106920 |
| C  | 4.054915  | -0.974769 | -2.363154 |
| P  | -1.775228 | -0.143819 | 2.113753  |
| P  | -0.694012 | 1.237022  | 0.782281  |
| P  | -1.977793 | 2.908996  | -0.009605 |
| C  | -3.510891 | 3.054625  | 0.952256  |
| C  | -2.403252 | 0.949922  | 3.461964  |
| C  | -0.191953 | 0.546198  | -2.465944 |
| C  | -2.440600 | 2.968444  | -1.761811 |
| C  | -1.084983 | 4.462325  | 0.390805  |
| C  | 0.024456  | 4.901369  | -0.564637 |
| P  | 1.298356  | 3.590155  | -0.912182 |
| C  | 2.293783  | 3.607721  | 0.633646  |
| C  | 2.392487  | 4.510139  | -2.070077 |
| C  | 4.089096  | -2.948304 | -0.205913 |
| C  | 5.202907  | -2.239633 | 0.567516  |
| P  | 4.490094  | -0.794910 | 1.477667  |
| C  | 5.913844  | 0.310787  | 1.783384  |
| C  | 1.869738  | -2.837564 | -2.040563 |
| C  | 4.055017  | -1.449313 | 3.126986  |
| H  | -2.712147 | 0.279181  | 4.277800  |
| H  | 0.333823  | 1.509856  | -2.460019 |
| H  | -3.265710 | 1.569873  | 3.193593  |
| H  | -1.584645 | 1.575811  | 3.846625  |
| H  | -1.240952 | 0.667122  | -2.763585 |
| H  | 0.294799  | -0.125699 | -3.188430 |
| H  | -3.488237 | -2.667052 | 2.448704  |
| H  | -5.315720 | -3.346556 | 0.592521  |
| H  | -5.439300 | -1.369121 | -1.239953 |
| H  | -3.688742 | 0.540054  | -0.536517 |
| H  | -0.417841 | -2.821419 | 0.919851  |
| H  | -2.011572 | -4.790633 | -0.034570 |
| H  | -3.067161 | -3.958688 | -2.377085 |
| H  | -2.158573 | -1.488693 | -2.891041 |
| H  | -1.868610 | 5.236476  | 0.451649  |
| H  | -0.704196 | 4.323645  | 1.416624  |
| H  | -3.033096 | 3.882905  | -1.918591 |
| H  | -1.542088 | 3.009711  | -2.389180 |
| H  | -3.049675 | 2.098258  | -2.041350 |
| H  | -4.124229 | 3.845550  | 0.495205  |
| H  | -4.079792 | 2.116980  | 0.970349  |

|   |           |           |           |
|---|-----------|-----------|-----------|
| H | -3.265051 | 3.355000  | 1.979472  |
| H | 0.493697  | 5.810852  | -0.154788 |
| H | -0.410418 | 5.192933  | -1.535054 |
| H | 3.283396  | 3.901877  | -2.283816 |
| H | 1.872403  | 4.688670  | -3.022490 |
| H | 2.718907  | 5.476090  | -1.655047 |
| H | 3.161124  | 2.945896  | 0.492980  |
| H | 2.645735  | 4.618258  | 0.892066  |
| H | 1.706183  | 3.194789  | 1.466484  |
| H | 2.471554  | -3.517971 | -2.660914 |
| H | 1.245106  | -3.423471 | -1.353999 |
| H | 1.215384  | -2.252512 | -2.699401 |
| H | 4.562726  | -1.723000 | -2.990033 |
| H | 3.426707  | -0.329675 | -2.993494 |
| H | 4.800676  | -0.338170 | -1.867504 |
| H | 4.494433  | -3.665567 | -0.937920 |
| H | 3.425097  | -3.511117 | 0.469926  |
| H | 5.717260  | -2.940589 | 1.243246  |
| H | 5.966108  | -1.852479 | -0.126475 |
| H | 3.620174  | -0.641412 | 3.733233  |
| H | 3.293237  | -2.234038 | 3.018551  |
| H | 4.933407  | -1.856463 | 3.649614  |
| H | 5.588652  | 1.157429  | 2.404902  |
| H | 6.727723  | -0.217124 | 2.303183  |
| H | 6.291708  | 0.709240  | 0.831149  |

55

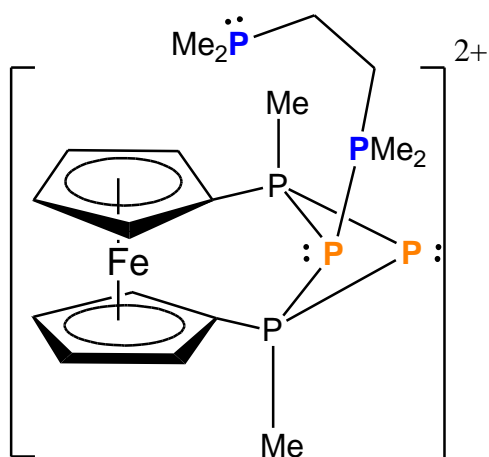

scf done: -4013.863614

|    |           |           |           |
|----|-----------|-----------|-----------|
| C  | -2.150950 | 1.558790  | -1.027159 |
| C  | -2.230995 | 1.186193  | 0.359877  |
| C  | -3.526571 | 0.598675  | 0.576870  |
| C  | -4.217658 | 0.609671  | -0.661458 |
| C  | -3.375780 | 1.194591  | -1.646446 |
| Fe | -2.443642 | -0.453719 | -0.795937 |
| C  | -0.870184 | -1.511035 | -1.591016 |
| C  | -1.035788 | -1.754998 | -0.186778 |
| C  | -2.345512 | -2.318420 | 0.014625  |
| C  | -2.969120 | -2.404314 | -1.256503 |
| C  | -2.070600 | -1.903424 | -2.239173 |
| P  | 0.050771  | -1.331524 | 1.166647  |
| C  | 1.144256  | -2.719759 | 1.533385  |
| P  | -0.966611 | 1.224697  | 1.633303  |



|   |           |           |           |
|---|-----------|-----------|-----------|
| C | -1.031706 | 2.792624  | 2.534409  |
| P | -0.907480 | -0.514432 | 2.911621  |
| P | 1.088930  | 0.622370  | 0.973436  |
| P | 1.706666  | 1.703457  | -0.933180 |
| C | 3.533959  | 1.814815  | -0.884876 |
| C | 4.244680  | 0.502784  | -1.219648 |
| P | 3.595917  | -0.891593 | -0.183067 |
| C | 4.642443  | -0.798551 | 1.321190  |
| C | 1.237031  | 1.150510  | -2.591512 |
| C | 1.121534  | 3.403669  | -0.678504 |
| C | 4.240512  | -2.371798 | -1.052300 |
| H | -1.999665 | 2.847959  | 3.055627  |
| H | 1.891689  | -2.425787 | 2.281859  |
| H | -0.966192 | 3.638597  | 1.836139  |
| H | -0.218471 | 2.833265  | 3.271591  |
| H | 1.621240  | -3.078061 | 0.611960  |
| H | 0.513647  | -3.524793 | 1.943501  |
| H | -3.897572 | 0.192084  | 1.516777  |
| H | -5.217045 | 0.212936  | -0.830505 |
| H | -3.622982 | 1.334025  | -2.697199 |
| H | -1.325268 | 2.055559  | -1.527055 |
| H | -2.786195 | -2.601106 | 0.969657  |
| H | -3.978060 | -2.768584 | -1.441332 |
| H | -2.271231 | -1.829137 | -3.306404 |
| H | 0.021771  | -1.126027 | -2.074224 |
| H | 3.810998  | 2.617844  | -1.588938 |
| H | 3.796075  | 2.175948  | 0.123640  |
| H | 1.616755  | 1.887637  | -3.316281 |
| H | 1.700926  | 0.177012  | -2.800477 |
| H | 0.148285  | 1.062136  | -2.692278 |
| H | 1.516866  | 4.044883  | -1.480955 |
| H | 0.025284  | 3.465850  | -0.686192 |
| H | 1.500431  | 3.777570  | 0.284328  |
| H | 5.330848  | 0.629831  | -1.088142 |
| H | 4.093186  | 0.241394  | -2.279366 |
| H | 4.053546  | -3.268542 | -0.443605 |
| H | 3.731927  | -2.502557 | -2.018231 |
| H | 5.324667  | -2.293362 | -1.225006 |
| H | 4.407282  | -1.641149 | 1.988002  |
| H | 5.713402  | -0.843531 | 1.072328  |
| H | 4.438346  | 0.130018  | 1.873822  |

24

Me2P(CH2)2PMe2 scf done: -920.534643

|   |           |           |           |
|---|-----------|-----------|-----------|
| P | 0.028256  | -0.236320 | 0.230358  |
| C | 0.430323  | 0.289364  | 1.959881  |
| C | 1.734019  | -0.064922 | -0.509641 |
| C | -0.751630 | 1.317932  | -0.398441 |
| H | -0.986350 | 1.198745  | -1.466782 |
| H | -1.700267 | 1.489021  | 0.132451  |
| H | -0.106313 | 2.201920  | -0.264813 |
| C | 1.778524  | -0.033727 | -2.040401 |
| H | 2.223423  | 0.840643  | -0.109645 |
| H | 2.316899  | -0.924287 | -0.136400 |

|   |           |           |           |
|---|-----------|-----------|-----------|
| H | -0.497003 | 0.357023  | 2.548452  |
| H | 1.070052  | -0.470114 | 2.434674  |
| H | 0.947510  | 1.262202  | 1.999369  |
| H | 2.824668  | -0.134465 | -2.379474 |
| P | 0.716439  | -1.313125 | -2.890752 |
| H | 1.426361  | 0.946538  | -2.404583 |
| C | 1.483156  | -1.224550 | -4.574065 |
| C | 1.512968  | -2.859665 | -2.262534 |
| H | 1.049845  | -2.005604 | -5.216818 |
| H | 1.250805  | -0.251094 | -5.032191 |
| H | 2.578000  | -1.351771 | -4.549997 |
| H | 1.147305  | -3.718978 | -2.844676 |
| H | 2.613095  | -2.828635 | -2.329296 |
| H | 1.217707  | -3.019175 | -1.214675 |

79

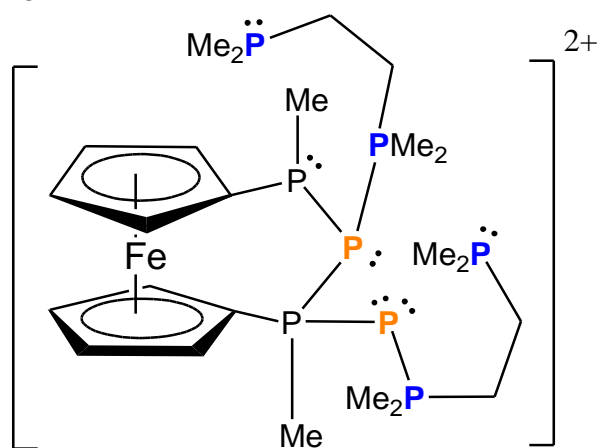

scf done: -4934.466337

|    |           |           |           |
|----|-----------|-----------|-----------|
| C  | -2.307967 | 2.722969  | -1.196773 |
| C  | -1.808119 | 1.630181  | -0.444940 |
| C  | -0.739289 | 1.033210  | -1.200408 |
| C  | -0.594341 | 1.785760  | -2.425297 |
| C  | -1.568035 | 2.817389  | -2.410580 |
| Fe | -0.293485 | 2.956193  | -0.781159 |
| C  | -0.020337 | 4.075047  | 0.905523  |
| C  | 0.922262  | 2.994101  | 0.824642  |
| C  | 1.679059  | 3.190519  | -0.382548 |
| C  | 1.200100  | 4.364223  | -1.026182 |
| C  | 0.156904  | 4.909172  | -0.229632 |
| P  | 0.769661  | 1.577468  | 1.952367  |
| C  | 1.931171  | 1.902706  | 3.349319  |
| P  | 0.166007  | -0.443812 | -0.727114 |
| P  | -0.947677 | -1.910414 | 0.338974  |
| P  | -2.628802 | -2.230850 | -0.998429 |
| C  | -3.944585 | -2.954844 | 0.055279  |
| C  | -4.218721 | -2.276188 | 1.399962  |
| P  | -4.708565 | -0.476670 | 1.321281  |
| C  | -4.974269 | -0.173814 | 3.117146  |
| P  | 1.633105  | -0.205938 | 0.979853  |
| P  | 3.757503  | 0.066401  | 0.269379  |
| C  | 4.127970  | 0.150946  | -1.502869 |
| C  | 4.715444  | -1.321402 | 0.993126  |

|   |           |           |           |
|---|-----------|-----------|-----------|
| C | 4.693348  | -2.653176 | 0.244197  |
| P | 2.983314  | -3.279136 | -0.135164 |
| C | 2.437320  | -3.910515 | 1.502181  |
| C | 4.493302  | 1.531756  | 1.047721  |
| C | 3.396569  | -4.834976 | -1.023128 |
| C | 1.003677  | -0.946234 | -2.260819 |
| C | -3.331496 | -0.854503 | -1.952452 |
| C | -2.259168 | -3.515576 | -2.230867 |
| C | -6.447788 | -0.632919 | 0.723081  |
| H | 1.410168  | 2.609046  | 4.013280  |
| H | 1.616407  | -1.832122 | -2.047896 |
| H | 2.888269  | 2.353673  | 3.065034  |
| H | 2.094338  | 0.978690  | 3.923392  |
| H | 1.607360  | -0.131291 | -2.680000 |
| H | 0.214824  | -1.203356 | -2.983168 |
| H | -0.772464 | 4.208976  | 1.682196  |
| H | -0.426738 | 5.797645  | -0.462854 |
| H | 1.555549  | 4.764133  | -1.973968 |
| H | 2.449326  | 2.534223  | -0.779277 |
| H | -2.179490 | 1.281304  | 0.518724  |
| H | -3.107081 | 3.392159  | -0.883790 |
| H | -1.704522 | 3.568449  | -3.186473 |
| H | 0.120438  | 1.606303  | -3.225848 |
| H | 5.747772  | -0.940939 | 1.075753  |
| H | 4.340951  | -1.430012 | 2.025036  |
| H | 5.218638  | 0.258469  | -1.608071 |
| H | 3.808857  | -0.773264 | -1.999824 |
| H | 3.640201  | 1.016611  | -1.971057 |
| H | 5.506855  | 1.658970  | 0.638538  |
| H | 3.908367  | 2.440727  | 0.861638  |
| H | 4.574702  | 1.361949  | 2.129727  |
| H | 5.263644  | -3.390131 | 0.833137  |
| H | 5.224293  | -2.552775 | -0.716909 |
| H | 2.471270  | -5.397963 | -1.213144 |
| H | 3.857488  | -4.607558 | -1.995330 |
| H | 4.080975  | -5.472726 | -0.443037 |
| H | 1.473482  | -4.425224 | 1.376369  |
| H | 3.162935  | -4.613410 | 1.939219  |
| H | 2.268082  | -3.075752 | 2.197841  |
| H | -4.189869 | -1.246818 | -2.518436 |
| H | -3.665682 | -0.062914 | -1.269591 |
| H | -2.593296 | -0.448514 | -2.657403 |
| H | -3.176379 | -3.803236 | -2.766800 |
| H | -1.524126 | -3.139672 | -2.956067 |
| H | -1.837563 | -4.395064 | -1.725603 |
| H | -3.647084 | -4.004017 | 0.217047  |
| H | -4.847087 | -2.987064 | -0.579035 |
| H | -5.001667 | -2.855504 | 1.917115  |
| H | -3.318708 | -2.331098 | 2.033760  |
| H | -6.938285 | 0.350316  | 0.776870  |
| H | -6.467984 | -0.946523 | -0.331871 |
| H | -7.035097 | -1.349282 | 1.318640  |
| H | -5.419821 | 0.822259  | 3.254262  |
| H | -5.640018 | -0.922005 | 3.574549  |

H -4.007852 -0.185418 3.642175

31

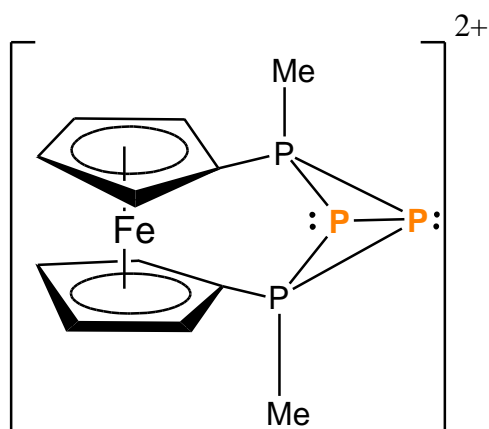

scf done: -3093.225177

|    |           |           |           |
|----|-----------|-----------|-----------|
| C  | 0.234582  | 0.240678  | -0.133904 |
| C  | -0.026352 | 0.000224  | 1.237624  |
| C  | 1.211211  | -0.114301 | 1.932272  |
| C  | 2.274665  | 0.051833  | 1.011189  |
| C  | 1.670851  | 0.277259  | -0.281330 |
| Fe | 1.105957  | 1.722976  | 0.963524  |
| C  | 0.280964  | 3.472794  | 0.316941  |
| C  | 0.020676  | 3.335749  | 1.702721  |
| C  | 1.257839  | 3.221127  | 2.398052  |
| C  | 2.320369  | 3.283912  | 1.463164  |
| C  | 1.716351  | 3.437641  | 0.160273  |
| P  | 2.583867  | 3.531352  | -1.368645 |
| C  | 3.033768  | 5.198311  | -1.893207 |
| P  | 2.541240  | 0.582893  | -1.780748 |
| C  | 2.945923  | -0.888260 | -2.744293 |
| P  | 4.136293  | 2.085045  | -1.937549 |
| H  | 2.006004  | -1.405106 | -2.992581 |
| H  | 3.569522  | 5.185232  | -2.852991 |
| H  | 3.562929  | -1.550119 | -2.117008 |
| H  | 3.487783  | -0.627919 | -3.664603 |
| H  | 3.668859  | 5.644266  | -1.112171 |
| H  | 2.110032  | 5.790469  | -1.984210 |
| H  | -0.509592 | 0.364055  | -0.919662 |
| H  | -1.016254 | -0.065391 | 1.686545  |
| H  | 1.327114  | -0.282306 | 3.001890  |
| H  | 3.338644  | 0.007795  | 1.240199  |
| H  | -0.462835 | 3.590297  | -0.470077 |
| H  | -0.969020 | 3.303418  | 2.155710  |
| H  | 1.373648  | 3.086376  | 3.472378  |
| H  | 3.384098  | 3.233311  | 1.691976  |
| P  | 2.071336  | 2.277083  | -3.097519 |
